# Supplementary material for: Bioactive Platinum(IV) Complexes Incorporating Halogenated Phenylacetates
Source: MDPI journal article supplement (doi:10.3390/molecules27207120), 2022-10-21
Supplement: s1 [file s1]

## **SUPPLEMENTARY MATERIALS**

### **Bioactive Platinum(IV) Complexes Incorporating Halogenated Phenylacetates**

Angelico D. Aputen <sup>1</sup>, Maria George Elias <sup>1,2</sup>, Jayne Gilbert <sup>3</sup>, Jennette A. Sakoff <sup>3</sup>, Christopher P. Gordon <sup>1</sup>, Kieran F. Scott <sup>2</sup> and Janice R. Aldrich-Wright <sup>1,\*</sup>

<sup>1</sup> School of Science, Western Sydney University, Locked Bag 1797, Penrith South, Sydney, NSW 2751, Australia

<sup>2</sup> Ingham Institute, Liverpool, Sydney, NSW 2170, Australia

<sup>3</sup> Calvary Mater Newcastle Hospital, Waratah, Newcastle, NSW 2298, Australia

\*Correspondence: [j.aldrich-wright@westernsydney.edu.au](mailto:j.aldrich-wright@westernsydney.edu.au) (J.R.A.-W.);

Tel.: +61-246203218

## Table of contents

| <b>HPLC chromatograms of NHS esters</b>        |                                                                                                                                                                                                                                                                        |           |
|------------------------------------------------|------------------------------------------------------------------------------------------------------------------------------------------------------------------------------------------------------------------------------------------------------------------------|-----------|
| <b>Figure S1:</b>                              | HPLC chromatogram of NHS-4-CPA within the collection wavelength of 254 nm obtained at 298 K, by an Agilent ZORBAX RX-C <sub>18</sub> column (100 × 4.6 mm, 3.5 µm pore size) using a 0 – 100% linear gradient over 15 min with a flow rate of 1 mL.min <sup>-1</sup> . | <b>11</b> |
| <b>Figure S2:</b>                              | HPLC chromatogram of NHS-4-FPA within the collection wavelength of 254 nm obtained at 298 K, by an Agilent ZORBAX RX-C <sub>18</sub> column (100 × 4.6 mm, 3.5 µm pore size) using a 0 – 100% linear gradient over 15 min with a flow rate of 1 mL.min <sup>-1</sup> . | <b>11</b> |
| <b>Figure S3:</b>                              | HPLC chromatogram of NHS-4-BPA within the collection wavelength of 254 nm obtained at 298 K, by an Agilent ZORBAX RX-C <sub>18</sub> column (100 × 4.6 mm, 3.5 µm pore size) using a 0 – 100% linear gradient over 15 min with a flow rate of 1 mL.min <sup>-1</sup> . | <b>11</b> |
| <b>Figure S4:</b>                              | HPLC chromatogram of NHS-4-IPA within the collection wavelength of 254 nm obtained at 298 K, by an Agilent ZORBAX RX-C <sub>18</sub> column (100 × 4.6 mm, 3.5 µm pore size) using a 0 – 100% linear gradient over 15 min with a flow rate of 1 mL.min <sup>-1</sup> . | <b>12</b> |
| <b><sup>1</sup>H-NMR spectra of NHS esters</b> |                                                                                                                                                                                                                                                                        |           |
| <b>Figure S5:</b>                              | <sup>1</sup> H-NMR spectrum of NHS-4-CPA in CD <sub>3</sub> CN obtained at 298 K. Inset: structure of NHS-4-CPA with proton labelling system.                                                                                                                          | <b>13</b> |
| <b>Figure S6:</b>                              | <sup>1</sup> H-NMR spectrum of NHS-4-FPA in CD <sub>3</sub> CN obtained at 298 K. Inset: expanded <sup>19</sup> F-NMR and structure of NHS-4-FPA with proton labelling system.                                                                                         | <b>14</b> |
| <b>Figure S7:</b>                              | <sup>1</sup> H-NMR spectrum of NHS-4-BPA in CD <sub>3</sub> CN obtained at 298 K. Inset: expanded <sup>19</sup> F-NMR and structure of NHS-4-BPA with proton labelling system.                                                                                         | <b>15</b> |
| <b>Figure S8:</b>                              | <sup>1</sup> H-NMR spectrum of NHS-4-IPA in CD <sub>3</sub> CN obtained at 298 K. Inset: expanded <sup>19</sup> F-NMR and structure of NHS-4-IPA with proton labelling system.                                                                                         | <b>16</b> |
|                                                |                                                                                                                                                                                                                                                                        |           |

| <b>ESI-MS spectra of NHS esters</b>                      |                                                                                                                                                                                                                                                                                |           |
|----------------------------------------------------------|--------------------------------------------------------------------------------------------------------------------------------------------------------------------------------------------------------------------------------------------------------------------------------|-----------|
| <b>Figure S9:</b>                                        | ESI-MS spectrum of NHS-4-CPA obtained at 298 K, using a Waters SYNAPT G2-Si quadrupole time-of-flight (QTOF) HDMS. Inset: structure of NHS-4-CPA.                                                                                                                              | <b>17</b> |
| <b>Figure S10:</b>                                       | ESI-MS spectrum of NHS-4-FPA obtained at 298 K, using a Waters SYNAPT G2-Si quadrupole time-of-flight (QTOF) HDMS. Inset: structure of NHS-4-FPA.                                                                                                                              | <b>17</b> |
| <b>Figure S11:</b>                                       | ESI-MS spectrum of NHS-4-BPA obtained at 298 K, using a Waters SYNAPT G2-Si quadrupole time-of-flight (QTOF) HDMS. Inset: structure of NHS-4-BPA.                                                                                                                              | <b>18</b> |
| <b>Figure S12:</b>                                       | ESI-MS spectrum of NHS-4-IPA obtained at 298 K, using a Waters SYNAPT G2-Si quadrupole time-of-flight (QTOF) HDMS. Inset: structure of NHS-4-IPA.                                                                                                                              | <b>18</b> |
| <b>HPLC chromatograms of platinum(IV) complexes, 1–8</b> |                                                                                                                                                                                                                                                                                |           |
| <b>Figure S13:</b>                                       | HPLC chromatogram of <b>1</b> within the collection wavelength of 254 nm obtained at 298 K, by a Phenomenex Onyx™ Monolithic C18-reverse phase column (100 × 4.6 mm, 5 µm pore size) using a 0 – 100% linear gradient over 15 min with a flow rate of 1 mL.min <sup>-1</sup> . | <b>19</b> |
| <b>Figure S14:</b>                                       | HPLC chromatogram of <b>2</b> within the collection wavelength of 254 nm obtained at 298 K, by a Phenomenex Onyx™ Monolithic C18-reverse phase column (100 × 4.6 mm, 5 µm pore size) using a 0 – 100% linear gradient over 15 min with a flow rate of 1 mL.min <sup>-1</sup> . | <b>19</b> |
| <b>Figure S15:</b>                                       | HPLC chromatogram of <b>3</b> within the collection wavelength of 254 nm obtained at 298 K, by a Phenomenex Onyx™ Monolithic C18-reverse phase column (100 × 4.6 mm, 5 µm pore size) using a 0 – 100% linear gradient over 15 min with a flow rate of 1 mL.min <sup>-1</sup> . | <b>20</b> |
| <b>Figure S16:</b>                                       | HPLC chromatogram of <b>4</b> within the collection wavelength of 254 nm obtained at 298 K, by a Phenomenex Onyx™ Monolithic C18-reverse phase column (100 × 4.6 mm, 5 µm pore size) using a 0 – 100% linear gradient over 15 min with a flow rate of 1 mL.min <sup>-1</sup> . | <b>20</b> |
| <b>Figure S17:</b>                                       | HPLC chromatogram of <b>5</b> within the collection wavelength of 254 nm obtained at 298 K, by a Phenomenex Onyx™ Monolithic C18-reverse                                                                                                                                       | <b>21</b> |

|                                                                                          |                                                                                                                                                                                                                                                                                |           |
|------------------------------------------------------------------------------------------|--------------------------------------------------------------------------------------------------------------------------------------------------------------------------------------------------------------------------------------------------------------------------------|-----------|
|                                                                                          | phase column (100 × 4.6 mm, 5 µm pore size) using a 0 – 100% linear gradient over 15 min with a flow rate of 1 mL.min <sup>-1</sup> .                                                                                                                                          |           |
| <b>Figure S18:</b>                                                                       | HPLC chromatogram of <b>6</b> within the collection wavelength of 254 nm obtained at 298 K, by a Phenomenex Onyx™ Monolithic C18-reverse phase column (100 × 4.6 mm, 5 µm pore size) using a 0 – 100% linear gradient over 15 min with a flow rate of 1 mL.min <sup>-1</sup> . | <b>21</b> |
| <b>Figure S19:</b>                                                                       | HPLC chromatogram of <b>7</b> within the collection wavelength of 254 nm obtained at 298 K, by a Phenomenex Onyx™ Monolithic C18-reverse phase column (100 × 4.6 mm, 5 µm pore size) using a 0 – 100% linear gradient over 15 min with a flow rate of 1 mL.min <sup>-1</sup> . | <b>22</b> |
| <b>Figure S20:</b>                                                                       | HPLC chromatogram of <b>8</b> within the collection wavelength of 254 nm obtained at 298 K, by a Phenomenex Onyx™ Monolithic C18-reverse phase column (100 × 4.6 mm, 5 µm pore size) using a 0 – 100% linear gradient over 15 min with a flow rate of 1 mL.min <sup>-1</sup> . | <b>22</b> |
| <b><sup>1</sup>H-NMR, 2D-COSY and <sup>1</sup>H-<sup>195</sup>Pt-HMQC spectra of 1–8</b> |                                                                                                                                                                                                                                                                                |           |
| <b>Figure S21:</b>                                                                       | <sup>1</sup> H-NMR spectrum of <b>1</b> in D <sub>2</sub> O obtained at 298 K Inset: structure of <b>1</b> with proton labelling system.                                                                                                                                       | <b>23</b> |
| <b>Figure S22:</b>                                                                       | 2D-COSY spectrum of <b>1</b> in D <sub>2</sub> O obtained at 298 K. Inset: structure of <b>1</b> with proton labelling system.                                                                                                                                                 | <b>24</b> |
| <b>Figure S23:</b>                                                                       | <sup>1</sup> H- <sup>195</sup> Pt-HMQC spectrum of <b>1</b> in D <sub>2</sub> O obtained at 298 K. Region: 400 ppm. Inset: structure of <b>1</b> with proton labelling system and arrows that indicate coupling.                                                               | <b>25</b> |
| <b>Figure S24:</b>                                                                       | <sup>1</sup> H- <sup>195</sup> Pt-HMQC spectrum of <b>1</b> in D <sub>2</sub> O obtained at 298 K. Region: -2800 ppm. Absence of platinum(II) resonance.                                                                                                                       | <b>26</b> |
| <b>Figure S25:</b>                                                                       | <sup>1</sup> H-NMR spectrum of <b>2</b> in D <sub>2</sub> O obtained at 298 K Inset: structure of <b>2</b> with proton labelling system.                                                                                                                                       | <b>27</b> |
| <b>Figure S26:</b>                                                                       | 2D-COSY spectrum of <b>2</b> in D <sub>2</sub> O obtained at 298 K. Inset: structure of <b>2</b> with proton labelling system.                                                                                                                                                 | <b>28</b> |
| <b>Figure S27:</b>                                                                       | <sup>1</sup> H- <sup>195</sup> Pt-HMQC spectrum of <b>2</b> in D <sub>2</sub> O obtained at 298 K. Region: 400 ppm. Inset: structure of <b>2</b> with proton labelling system and arrows that indicate coupling.                                                               | <b>29</b> |
| <b>Figure S28:</b>                                                                       | <sup>1</sup> H- <sup>195</sup> Pt-HMQC spectrum of <b>2</b> in D <sub>2</sub> O obtained at 298 K. Region: -2800 ppm. Absence of platinum(II) resonance.                                                                                                                       | <b>30</b> |



|                    |                                                                                                                                                                                                                  |           |
|--------------------|------------------------------------------------------------------------------------------------------------------------------------------------------------------------------------------------------------------|-----------|
| <b>Figure S29:</b> | <sup>19</sup> F-NMR spectrum of <b>3</b> in D <sub>2</sub> O obtained at 298 K.                                                                                                                                  | <b>31</b> |
| <b>Figure S30:</b> | <sup>1</sup> H-NMR spectrum of <b>3</b> in D <sub>2</sub> O obtained at 298 K Inset: structure of <b>3</b> with proton labelling system.                                                                         | <b>32</b> |
| <b>Figure S31:</b> | 2D-COSY spectrum of <b>3</b> in D <sub>2</sub> O obtained at 298 K. Inset: structure of <b>3</b> with proton labelling system.                                                                                   | <b>33</b> |
| <b>Figure S32:</b> | <sup>1</sup> H- <sup>195</sup> Pt-HMQC spectrum of <b>3</b> in D <sub>2</sub> O obtained at 298 K. Region: 400 ppm. Inset: structure of <b>3</b> with proton labelling system and arrows that indicate coupling. | <b>34</b> |
| <b>Figure S33:</b> | <sup>1</sup> H- <sup>195</sup> Pt-HMQC spectrum of <b>3</b> in D <sub>2</sub> O obtained at 298 K. Region: -2800 ppm. Absence of platinum(II) resonance.                                                         | <b>35</b> |
| <b>Figure S34:</b> | <sup>19</sup> F-NMR spectrum of <b>4</b> in D <sub>2</sub> O obtained at 298 K.                                                                                                                                  | <b>35</b> |
| <b>Figure S35:</b> | <sup>1</sup> H-NMR spectrum of <b>4</b> in D <sub>2</sub> O obtained at 298 K Inset: structure of <b>4</b> with proton labelling system.                                                                         | <b>36</b> |
| <b>Figure S36:</b> | 2D-COSY spectrum of <b>4</b> in D <sub>2</sub> O obtained at 298 K. Inset: structure of <b>4</b> with proton labelling system.                                                                                   | <b>37</b> |
| <b>Figure S37:</b> | <sup>1</sup> H- <sup>195</sup> Pt-HMQC spectrum of <b>4</b> in D <sub>2</sub> O obtained at 298 K. Region: 400 ppm. Inset: structure of <b>4</b> with proton labelling system and arrows that indicate coupling. | <b>38</b> |
| <b>Figure S38:</b> | <sup>1</sup> H- <sup>195</sup> Pt-HMQC spectrum of <b>4</b> in D <sub>2</sub> O obtained at 298 K. Region: -2800 ppm. Absence of platinum(II) resonance.                                                         | <b>39</b> |
| <b>Figure S39:</b> | <sup>1</sup> H-NMR spectrum of <b>5</b> in D <sub>2</sub> O obtained at 298 K Inset: structure of <b>5</b> with proton labelling system.                                                                         | <b>40</b> |
| <b>Figure S40:</b> | 2D-COSY spectrum of <b>5</b> in D <sub>2</sub> O obtained at 298 K. Inset: structure of <b>5</b> with proton labelling system.                                                                                   | <b>41</b> |
| <b>Figure S41:</b> | <sup>1</sup> H- <sup>195</sup> Pt-HMQC spectrum of <b>5</b> in D <sub>2</sub> O obtained at 298 K. Region: 400 ppm. Inset: structure of <b>5</b> with proton labelling system and arrows that indicate coupling. | <b>42</b> |
| <b>Figure S42:</b> | <sup>1</sup> H- <sup>195</sup> Pt-HMQC spectrum of <b>5</b> in D <sub>2</sub> O obtained at 298 K. Region: -2800 ppm. Absence of platinum(II) resonance.                                                         | <b>43</b> |
| <b>Figure S43:</b> | <sup>1</sup> H-NMR spectrum of <b>6</b> in D <sub>2</sub> O obtained at 298 K Inset: structure of <b>6</b> with proton labelling system.                                                                         | <b>44</b> |
| <b>Figure S44:</b> | 2D-COSY spectrum of <b>6</b> in D <sub>2</sub> O obtained at 298 K. Inset: structure of <b>6</b> with proton labelling system.                                                                                   | <b>45</b> |

|                          |                                                                                                                                                                                                                      |           |
|--------------------------|----------------------------------------------------------------------------------------------------------------------------------------------------------------------------------------------------------------------|-----------|
| <b>Figure S45:</b>       | $^1\text{H}$ - $^{195}\text{Pt}$ -HMQC spectrum of <b>6</b> in $\text{D}_2\text{O}$ obtained at 298 K. Region: 400 ppm. Inset: structure of <b>6</b> with proton labelling system and arrows that indicate coupling. | <b>46</b> |
| <b>Figure S46:</b>       | $^1\text{H}$ - $^{195}\text{Pt}$ -HMQC spectrum of <b>6</b> in $\text{D}_2\text{O}$ obtained at 298 K. Region: -2800 ppm. Absence of platinum(II) resonance.                                                         | <b>47</b> |
| <b>Figure S47:</b>       | $^1\text{H}$ -NMR spectrum of <b>7</b> in $\text{D}_2\text{O}$ obtained at 298 K Inset: structure of <b>7</b> with proton labelling system.                                                                          | <b>48</b> |
| <b>Figure S48:</b>       | 2D-COSY spectrum of <b>7</b> in $\text{D}_2\text{O}$ obtained at 298 K. Inset: structure of <b>7</b> with proton labelling system.                                                                                   | <b>49</b> |
| <b>Figure S49:</b>       | $^1\text{H}$ - $^{195}\text{Pt}$ -HMQC spectrum of <b>7</b> in $\text{D}_2\text{O}$ obtained at 298 K. Region: 400 ppm. Inset: structure of <b>7</b> with proton labelling system and arrows that indicate coupling. | <b>50</b> |
| <b>Figure S50:</b>       | $^1\text{H}$ - $^{195}\text{Pt}$ -HMQC spectrum of <b>7</b> in $\text{D}_2\text{O}$ obtained at 298 K. Region: -2800 ppm. Absence of platinum(II) resonance.                                                         | <b>51</b> |
| <b>Figure S51:</b>       | $^1\text{H}$ -NMR spectrum of <b>8</b> in $\text{D}_2\text{O}$ obtained at 298 K Inset: structure of <b>8</b> with proton labelling system.                                                                          | <b>52</b> |
| <b>Figure S52:</b>       | 2D-COSY spectrum of <b>8</b> in $\text{D}_2\text{O}$ obtained at 298 K. Inset: structure of <b>8</b> with proton labelling system.                                                                                   | <b>53</b> |
| <b>Figure S53:</b>       | $^1\text{H}$ - $^{195}\text{Pt}$ -HMQC spectrum of <b>8</b> in $\text{D}_2\text{O}$ obtained at 298 K. Region: 400 ppm. Inset: structure of <b>8</b> with proton labelling system and arrows that indicate coupling. | <b>54</b> |
| <b>Figure S54:</b>       | $^1\text{H}$ - $^{195}\text{Pt}$ -HMQC spectrum of <b>8</b> in $\text{D}_2\text{O}$ obtained at 298 K. Region: -2800 ppm. Absence of platinum(II) resonance.                                                         | <b>55</b> |
| <b>UV spectra of 1–8</b> |                                                                                                                                                                                                                      |           |
| <b>Figure S55:</b>       | UV spectra of <b>1</b> obtained at 298 K. Inset: structure of <b>1</b> and generated plot curves within the wavelengths 279 and 304 nm.                                                                              | <b>56</b> |
| <b>Figure S56:</b>       | UV spectra of <b>2</b> obtained at 298 K. Inset: structure of <b>2</b> and generated plot curves within the wavelengths 239, 287 and 317 nm.                                                                         | <b>57</b> |
| <b>Figure S57:</b>       | UV spectra of <b>3</b> at 298 K. Inset: structure of <b>3</b> and generated plot curves within the wavelengths 204 and 279 nm.                                                                                       | <b>57</b> |
| <b>Figure S58:</b>       | UV spectra of <b>4</b> obtained at 298 K. Inset: structure of <b>4</b> and generated plot curves within the wavelengths 248, 293 and 317 nm.                                                                         | <b>58</b> |

|                              |                                                                                                                                                  |           |
|------------------------------|--------------------------------------------------------------------------------------------------------------------------------------------------|-----------|
| <b>Figure S59:</b>           | UV spectra of <b>5</b> obtained at 298 K. Inset: structure of <b>5</b> and generated plot curves within the wavelengths 279 and 307 nm.          | <b>58</b> |
| <b>Figure S60:</b>           | UV spectra of <b>6</b> obtained at 298 K. Inset: structure of <b>6</b> and generated plot curves within the wavelengths 248, 291 and 317 nm.     | <b>59</b> |
| <b>Figure S61:</b>           | UV spectra of <b>7</b> obtained at 298 K. Inset: structure of <b>7</b> and generated plot curves within the wavelengths 280 and 306 nm.          | <b>59</b> |
| <b>Figure S62:</b>           | UV spectra of <b>8</b> obtained at 298 K. Inset: structure of <b>8</b> and generated plot curves within the wavelengths 230, 290 and 317 nm.     | <b>60</b> |
| <b>CD spectra of 1–8</b>     |                                                                                                                                                  |           |
| <b>Figure S63:</b>           | CD spectrum of <b>1</b> obtained at 298 K. Inset: structure of <b>1</b> .                                                                        | <b>61</b> |
| <b>Figure S64:</b>           | CD spectrum of <b>2</b> obtained at 298 K. Inset: structure of <b>2</b> .                                                                        | <b>61</b> |
| <b>Figure S65:</b>           | CD spectrum of <b>3</b> obtained at 298 K. Inset: structure of <b>3</b> .                                                                        | <b>62</b> |
| <b>Figure S66:</b>           | CD spectrum of <b>4</b> obtained at 298 K. Inset: structure of <b>4</b> .                                                                        | <b>62</b> |
| <b>Figure S67:</b>           | CD spectrum of <b>5</b> obtained at 298 K. Inset: structure of <b>5</b> .                                                                        | <b>63</b> |
| <b>Figure S68:</b>           | CD spectrum of <b>6</b> obtained at 298 K. Inset: structure of <b>6</b> .                                                                        | <b>63</b> |
| <b>Figure S69:</b>           | CD spectrum of <b>7</b> obtained at 298 K. Inset: structure of <b>7</b> .                                                                        | <b>64</b> |
| <b>Figure S70:</b>           | CD spectrum of <b>8</b> obtained at 298 K. Inset: structure of <b>8</b> .                                                                        | <b>64</b> |
| <b>ESI-MS spectra of 1–8</b> |                                                                                                                                                  |           |
| <b>Figure S71:</b>           | ESI-MS spectrum of <b>1</b> obtained at 298 K, using a Waters SYNAPT G2-Si quadrupole time-of-flight (QTOF) HDMS. Inset: structure of <b>1</b> . | <b>65</b> |
| <b>Figure S72:</b>           | ESI-MS spectrum of <b>2</b> obtained at 298 K, using a Waters SYNAPT G2-Si quadrupole time-of-flight (QTOF) HDMS. Inset: structure of <b>2</b> . | <b>66</b> |
| <b>Figure S73:</b>           | ESI-MS spectrum of <b>3</b> obtained at 298 K, using a Waters SYNAPT G2-Si quadrupole time-of-flight (QTOF) HDMS. Inset: structure of <b>3</b> . | <b>67</b> |
| <b>Figure S74:</b>           | ESI-MS spectrum of <b>4</b> obtained at 298 K, using a Waters SYNAPT G2-Si quadrupole time-of-flight (QTOF) HDMS. Inset: structure of <b>4</b> . | <b>68</b> |
| <b>Figure S75:</b>           | ESI-MS spectrum of <b>5</b> obtained at 298 K, using a Waters SYNAPT G2-Si quadrupole time-of-flight (QTOF) HDMS. Inset: structure of <b>5</b> . | <b>69</b> |
| <b>Figure S76:</b>           | ESI-MS spectrum of <b>6</b> obtained at 298 K, using a Waters SYNAPT G2-Si quadrupole time-of-flight (QTOF) HDMS. Inset: structure of <b>6</b> . | <b>70</b> |

|                                       |                                                                                                                                                                                                                                                                                                                             |           |
|---------------------------------------|-----------------------------------------------------------------------------------------------------------------------------------------------------------------------------------------------------------------------------------------------------------------------------------------------------------------------------|-----------|
| <b>Figure S77:</b>                    | ESI-MS spectrum of <b>7</b> obtained at 298 K, using a Waters SYNAPT G2-Si quadrupole time-of-flight (QTOF) HDMS. Inset: structure of <b>7</b> .                                                                                                                                                                            | <b>71</b> |
| <b>Figure S78:</b>                    | ESI-MS spectrum of <b>8</b> obtained at 298 K, using a Waters SYNAPT G2-Si quadrupole time-of-flight (QTOF) HDMS. Inset: structure of <b>8</b> .                                                                                                                                                                            | <b>72</b> |
| <b>Stability studies</b>              |                                                                                                                                                                                                                                                                                                                             |           |
| <b>Figure S79:</b>                    | HPLC chromatograms of <b>1–8</b> in 10 mM PBS (~7.4 pH) pre- and post-incubation (36 h) obtained at 298 K. Inset: structures of <b>1–8</b> .                                                                                                                                                                                | <b>73</b> |
| <b>Lipophilicity measurements</b>     |                                                                                                                                                                                                                                                                                                                             |           |
| <b>Figure S80:</b>                    | Generated plot curves of log k versus concentration of organic solvent, CH <sub>3</sub> CN to determine the chromatographic lipophilicity index, log kw of <b>1–8</b> .                                                                                                                                                     | <b>74</b> |
| <b>Reduction reaction experiments</b> |                                                                                                                                                                                                                                                                                                                             |           |
| <b>Figure S81:</b>                    | Preliminary 1D- <sup>195</sup> Pt-NMR spectra of <b>1, 2, 3</b> and <b>4</b> in 10 mM PBS (~7.4 pH) within the regions of -2800 and 400 ppm at 37 °C.                                                                                                                                                                       | <b>75</b> |
| <b>Figure S82:</b>                    | Preliminary 1D- <sup>195</sup> Pt-NMR spectra of <b>5, 6, 7</b> and <b>8</b> in 10 mM PBS (~7.4 pH) within the regions of -2800 and 400 ppm at 37 °C.                                                                                                                                                                       | <b>76</b> |
| <b>Figure S83:</b>                    | <sup>1</sup> H-NMR spectra of <b>3</b> with 10 mM PBS (~7.4 pH) and AsA in D <sub>2</sub> O at 310.15 K, in different time intervals, highlighting the movement of resonances from the phenanthroline protons and the aromatic protons of the 4-FPA ligand as indicated by the red arrows. <b>T</b> represents time in min. | <b>77</b> |
| <b>Figure S84:</b>                    | 1D- <sup>195</sup> Pt-NMR spectra of <b>3</b> with 10 mM PBS (~7.4 pH) and AsA in D <sub>2</sub> O, within the regions of -2800 and 400 ppm at 310.15 K, highlighting its complete reduction after 1 h from the final <sup>1</sup> H-NMR experiment.                                                                        | <b>77</b> |
| <b>Figure S85:</b>                    | <sup>1</sup> H-NMR spectra of <b>4</b> with 10 mM PBS (~7.4 pH) and AsA in D <sub>2</sub> O at 310.15 K, in different time intervals, highlighting the movement of resonances from the phenanthroline protons and the aromatic protons of the 4-FPA ligand as indicated by the red arrows. <b>T</b> represents time in min. | <b>78</b> |
| <b>Figure S86:</b>                    | 1D- <sup>195</sup> Pt-NMR spectra of <b>4</b> with 10 mM PBS (~7.4 pH) and AsA in D <sub>2</sub> O, within the regions of -2800 and 400 ppm at 310.15 K, highlighting                                                                                                                                                       | <b>78</b> |

|                    |                                                                                                                                                                                                                                                                                                                                |           |
|--------------------|--------------------------------------------------------------------------------------------------------------------------------------------------------------------------------------------------------------------------------------------------------------------------------------------------------------------------------|-----------|
|                    | its partial reduction after 1 h from the final $^1\text{H}$ -NMR experiment as indicated by *.                                                                                                                                                                                                                                 |           |
| <b>Figure S87:</b> | $^1\text{H}$ -NMR spectra of <b>5</b> with 10 mM PBS (~7.4 pH) and AsA in $\text{D}_2\text{O}$ at 310.15 K, in different time intervals, highlighting the movement of resonances from the phenanthroline protons and the aromatic protons of the 4-FPA ligand as indicated by the red arrows. <b>T</b> represents time in min. | <b>79</b> |
| <b>Figure S88:</b> | $1\text{D-}^{195}\text{Pt}$ -NMR spectra of <b>5</b> with 10 mM PBS (~7.4 pH) and AsA in $\text{D}_2\text{O}$ , within the regions of -2800 and 400 ppm at 310.15 K, highlighting its partial reduction after 1 h from the final $^1\text{H}$ -NMR experiment as indicated by *.                                               | <b>79</b> |
| <b>Figure S89:</b> | $^1\text{H}$ -NMR spectra of <b>6</b> with 10 mM PBS (~7.4 pH) and AsA in $\text{D}_2\text{O}$ at 310.15 K, in different time intervals, highlighting the movement of resonances from the phenanthroline protons and the aromatic protons of the 4-FPA ligand as indicated by the red arrows. <b>T</b> represents time in min. | <b>80</b> |
| <b>Figure S90:</b> | $1\text{D-}^{195}\text{Pt}$ -NMR spectra of <b>6</b> with 10 mM PBS (~7.4 pH) and AsA in $\text{D}_2\text{O}$ , within the regions of -2800 and 400 ppm at 310.15 K, highlighting its partial reduction after 1 h from the final $^1\text{H}$ -NMR experiment as indicated by *.                                               | <b>80</b> |
| <b>Figure S91:</b> | $^1\text{H}$ -NMR spectra of <b>7</b> with 10 mM PBS (~7.4 pH) and AsA in $\text{D}_2\text{O}$ at 310.15 K, in different time intervals, highlighting the movement of resonances from the phenanthroline protons and the aromatic protons of the 4-FPA ligand as indicated by the red arrows. <b>T</b> represents time in min. | <b>81</b> |
| <b>Figure S92:</b> | $1\text{D-}^{195}\text{Pt}$ -NMR spectra of <b>7</b> with 10 mM PBS (~7.4 pH) and AsA in $\text{D}_2\text{O}$ , within the regions of -2800 and 400 ppm at 310.15 K, highlighting its partial reduction after 1 h from the final $^1\text{H}$ -NMR experiment as indicated by *.                                               | <b>81</b> |
| <b>Figure S93:</b> | $^1\text{H}$ -NMR spectra of <b>8</b> with 10 mM PBS (~7.4 pH) and AsA in $\text{D}_2\text{O}$ at 310.15 K, in different time intervals, highlighting the movement of resonances from the phenanthroline protons and the aromatic protons                                                                                      | <b>82</b> |

|                        |                                                                                                                                                                                                                                                                                                                                                                                                                                                                                                                                                                                       |           |
|------------------------|---------------------------------------------------------------------------------------------------------------------------------------------------------------------------------------------------------------------------------------------------------------------------------------------------------------------------------------------------------------------------------------------------------------------------------------------------------------------------------------------------------------------------------------------------------------------------------------|-----------|
|                        | of the 4-FPA ligand as indicated by the red arrows. <b>T</b> represents time in min.                                                                                                                                                                                                                                                                                                                                                                                                                                                                                                  |           |
| <b>Figure S94:</b>     | <sup>1</sup> D- <sup>195</sup> Pt-NMR spectra of <b>8</b> with 10 mM PBS (~7.4 pH) and AsA in D <sub>2</sub> O, within the regions of -2800 and 400 ppm at 310.15 K, highlighting its complete reduction after 1 h from the final <sup>1</sup> H-NMR experiment.                                                                                                                                                                                                                                                                                                                      | <b>82</b> |
| <b>ROS experiments</b> |                                                                                                                                                                                                                                                                                                                                                                                                                                                                                                                                                                                       |           |
| <b>Figure S95:</b>     | ROS production upon treatment with <b>1–8</b> , 4-CPA, 4-FPA, 4-BPA, 4-IPA and cisplatin in HT29 colon cells at 0, 0.25, 0.5, 1, 3, 6, 12, 24, 48 and 72 h. <b>PHENSS(IV)-4CPA (1)</b> , <b>56MESS(IV)-4CPA (2)</b> , <b>PHENSS(IV)-4FPA (3)</b> , <b>56MESS(IV)-4FPA (4)</b> , <b>PHENSS(IV)-4BPA (5)</b> , <b>56MESS(IV)-4BPA (6)</b> , <b>PHENSS(IV)-4IPA (7)</b> , <b>56MESS(IV)-4IPA (8)</b> . TBHP: t-butyl hydroperoxide, NAC: <i>N</i> -acetylcysteine. Data points denote mean ± SEM. <i>n</i> = 3 from three independent experiments where samples were run in triplicates. | <b>83</b> |

### HPLC chromatograms of NHS esters

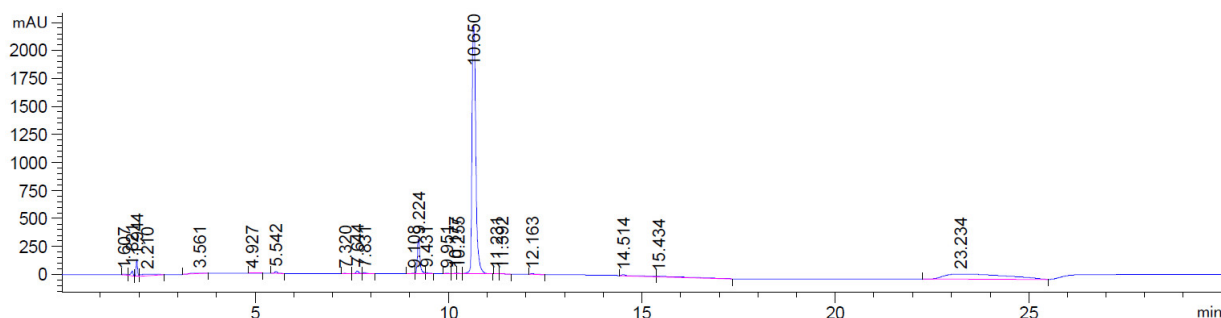

**Figure S1:** HPLC chromatogram of NHS-4-CPA within the collection wavelength of 254 nm obtained at 298 K, by an Agilent ZORBAX RX-C<sub>18</sub> column (100 × 4.6 mm, 3.5 μm pore size) using a 0 – 100% linear gradient over 15 min with a flow rate of 1 mL.min<sup>-1</sup>.

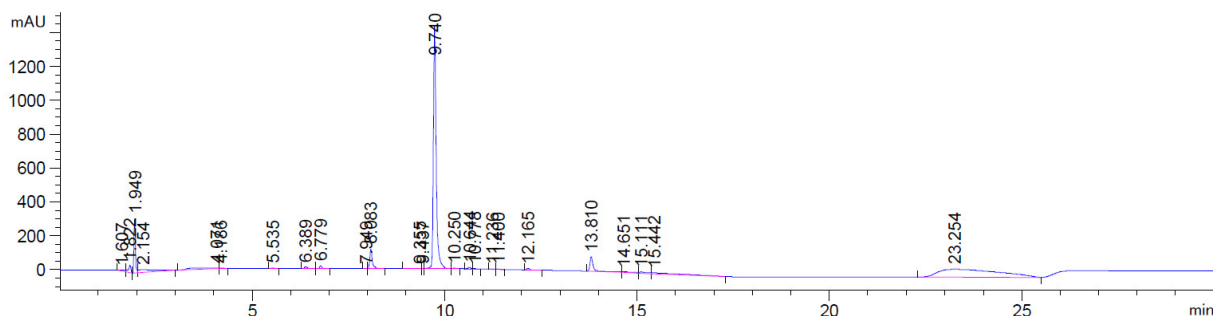

**Figure S2:** HPLC chromatogram of NHS-4-FPA within the collection wavelength of 254 nm obtained at 298 K, by an Agilent ZORBAX RX-C<sub>18</sub> column (100 × 4.6 mm, 3.5 μm pore size) using a 0 – 100% linear gradient over 15 min with a flow rate of 1 mL.min<sup>-1</sup>.

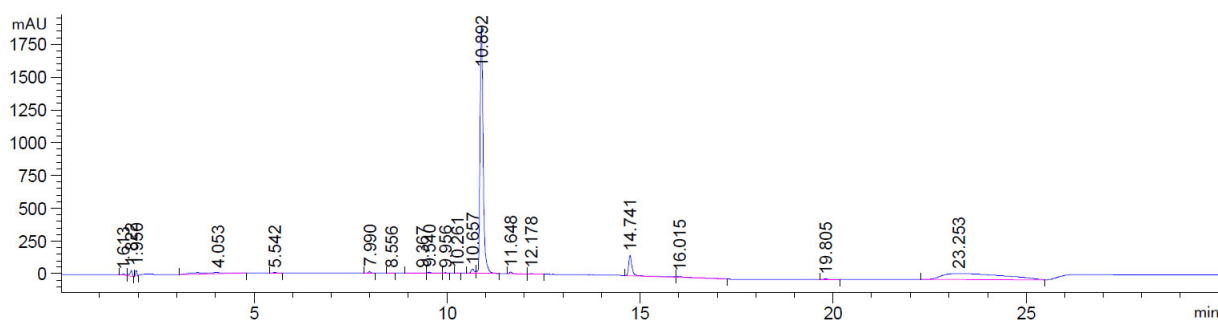

**Figure S3:** HPLC chromatogram of NHS-4-BPA within the collection wavelength of 254 nm obtained at 298 K, by an Agilent ZORBAX RX-C<sub>18</sub> column (100 × 4.6 mm, 3.5 μm pore size) using a 0 – 100% linear gradient over 15 min with a flow rate of 1 mL.min<sup>-1</sup>.

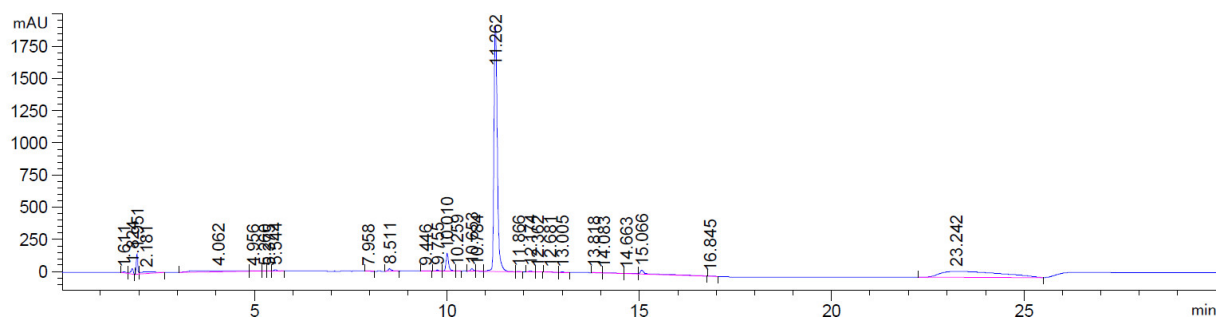

**Figure S4:** HPLC chromatogram of NHS-4-IPA within the collection wavelength of 254 nm obtained at 298 K, by an Agilent ZORBAX RX-C<sub>18</sub> column (100 × 4.6 mm, 3.5 μm pore size) using a 0 – 100% linear gradient over 15 min with a flow rate of 1 mL.min<sup>-1</sup>.



### <sup>1</sup>H-NMR spectra of NHS esters

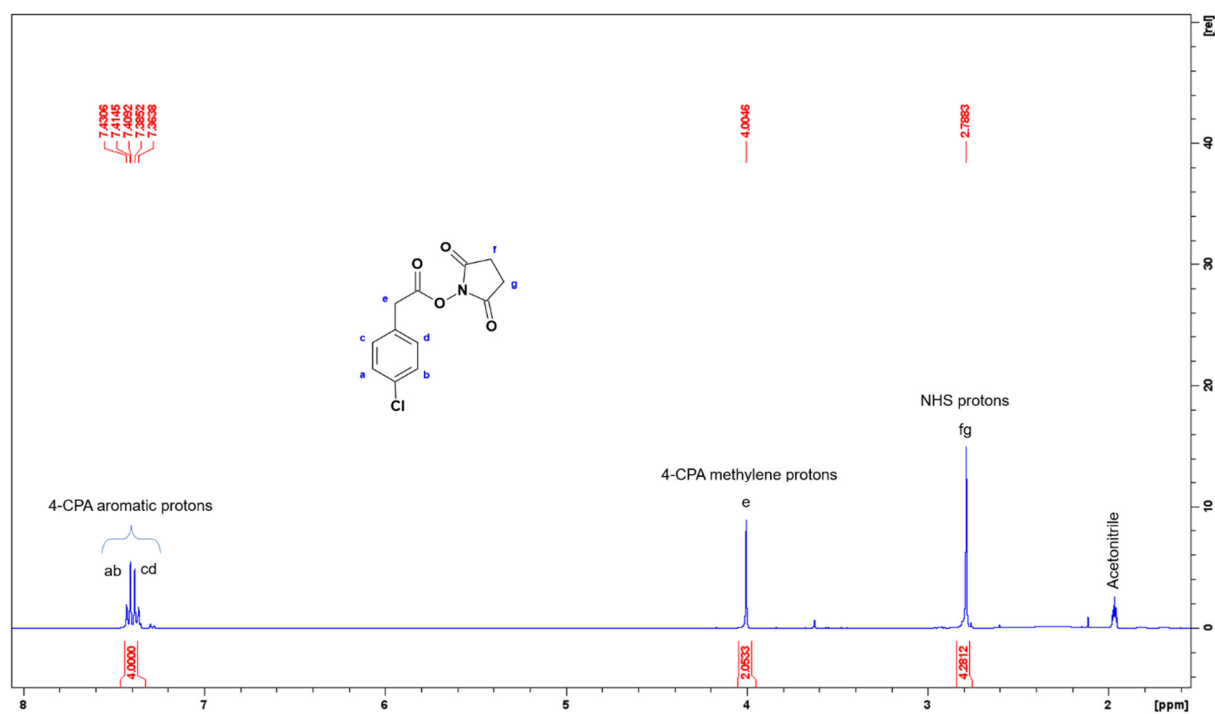

**Figure S5:** <sup>1</sup>H-NMR spectrum of NHS-4-CPA in CD<sub>3</sub>CN obtained at 298 K. Inset: structure of NHS-4-CPA with proton labelling system.

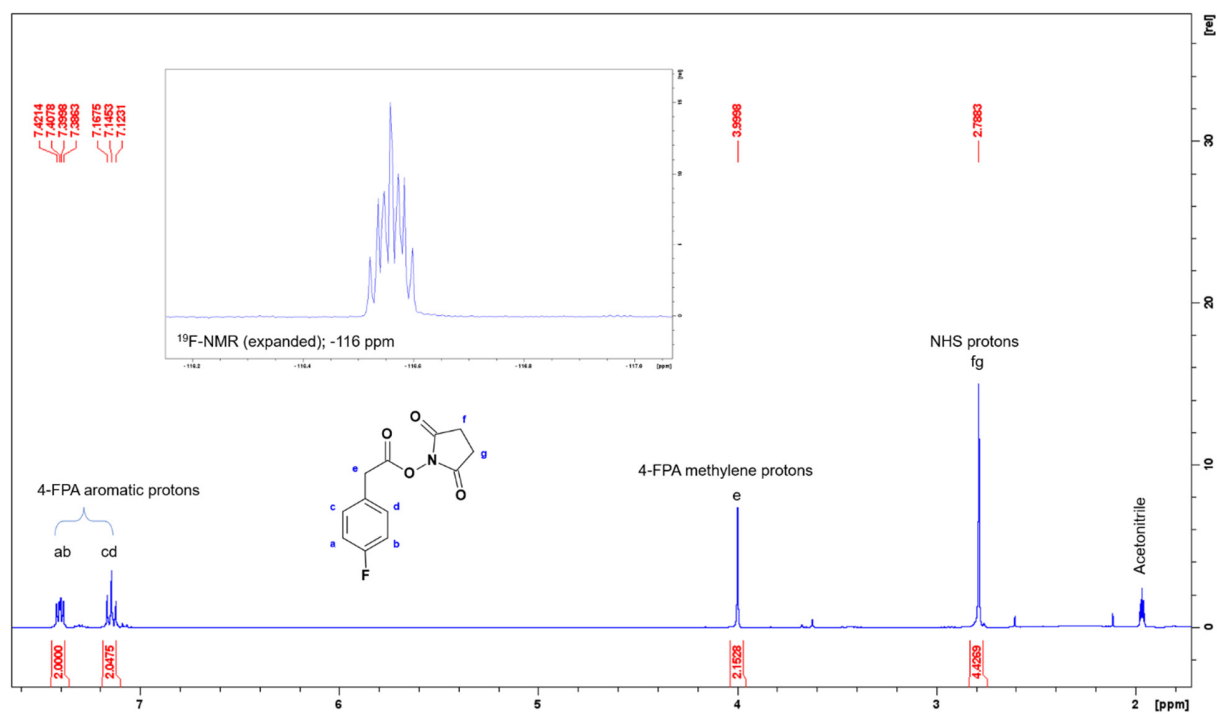

**Figure S6:**  $^1\text{H}$ -NMR spectrum of NHS-4-FPA in  $\text{CD}_3\text{CN}$  obtained at 298 K. Inset: expanded  $^{19}\text{F}$ -NMR and structure of NHS-4-FPA with proton labelling system.

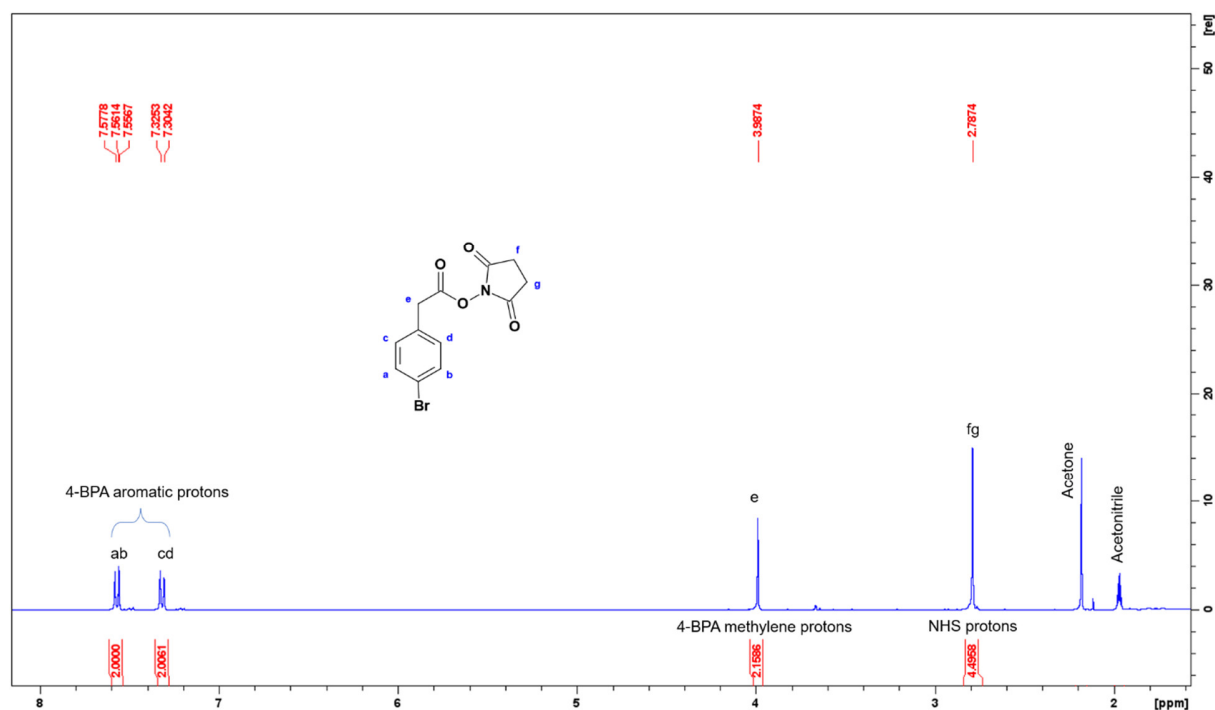

**Figure S7:**  $^1\text{H}$ -NMR spectrum of NHS-4-BPA in  $\text{CD}_3\text{CN}$  obtained at 298 K. Inset: structure of NHS-4-BPA with proton labelling system.

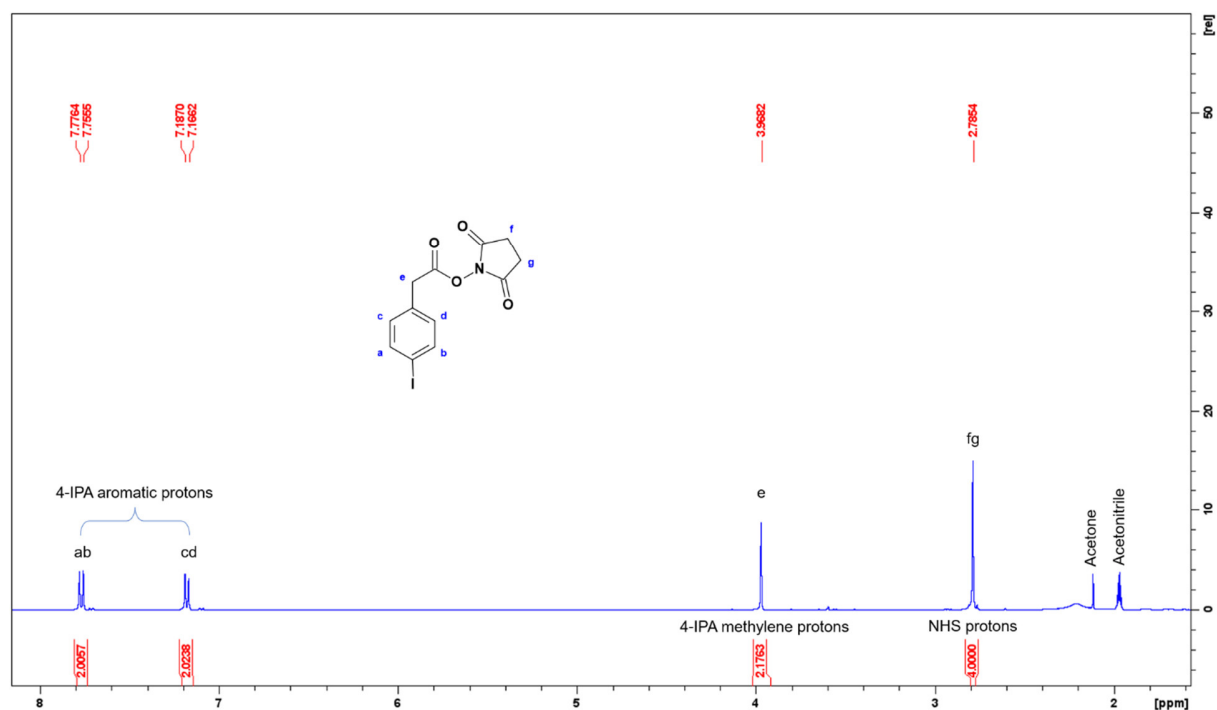

**Figure S8:**  $^1\text{H}$ -NMR spectrum of NHS-4-IPA in  $\text{CD}_3\text{CN}$  obtained at 298 K. Inset: structure of NHS-4-IPA with proton labelling system.

### ESI-MS spectra of NHS esters

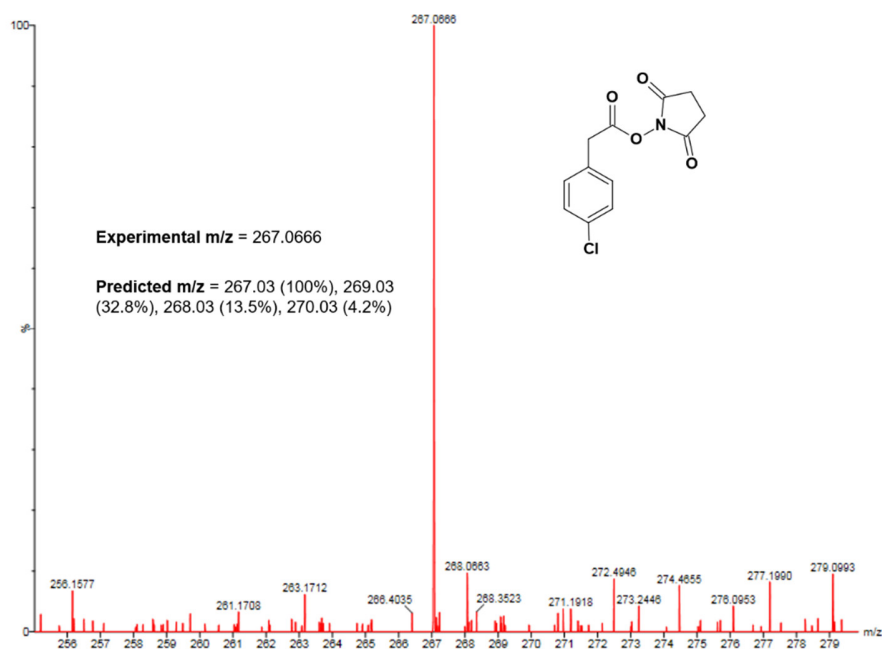

**Figure S9:** ESI-MS spectrum of NHS-4-CPA obtained at 298 K, using a Waters SYNAPT G2-Si quadrupole time-of-flight (QTOF) HDMS. Inset: structure of NHS-4-CPA.

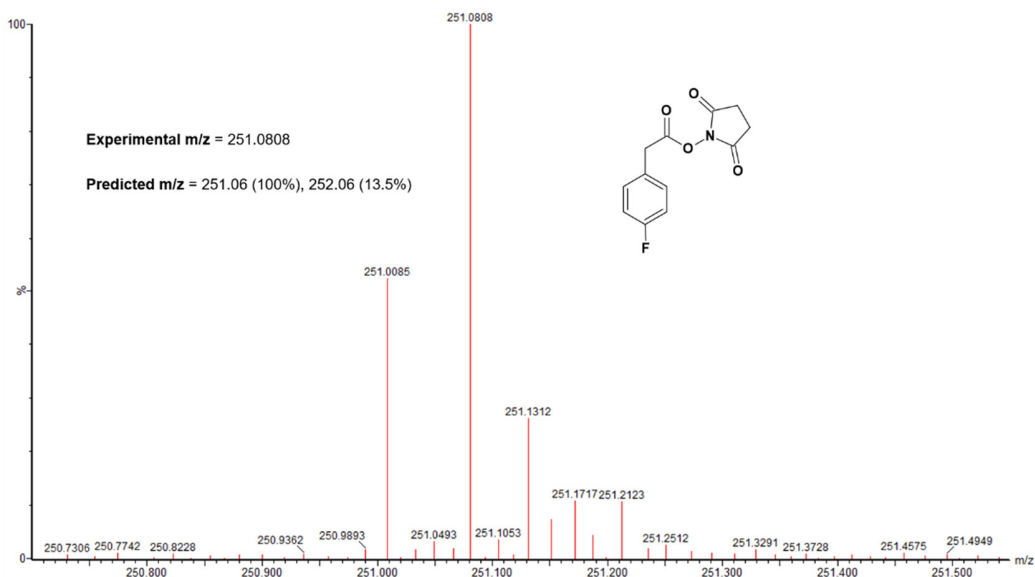

**Figure S10:** ESI-MS spectrum of NHS-4-FPA obtained at 298 K, using a Waters SYNAPT G2-Si quadrupole time-of-flight (QTOF) HDMS. Inset: structure of NHS-4-FPA.

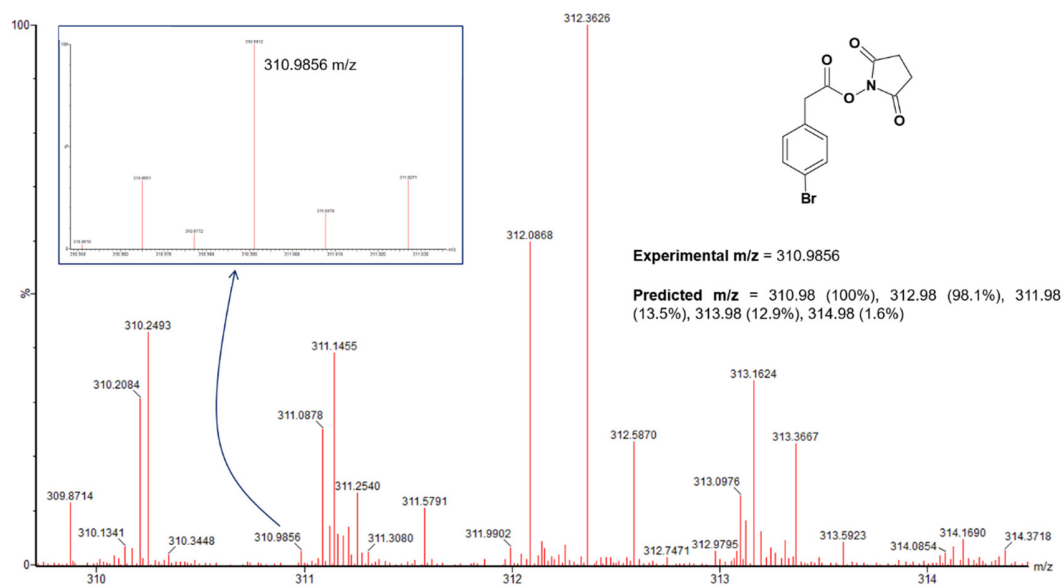

**Figure S11:** ESI-MS spectrum of NHS-4-BPA obtained at 298 K, using a Waters SYNAPT G2-Si quadrupole time-of-flight (QTOF) HDMS. Inset: structure of NHS-4-BPA.

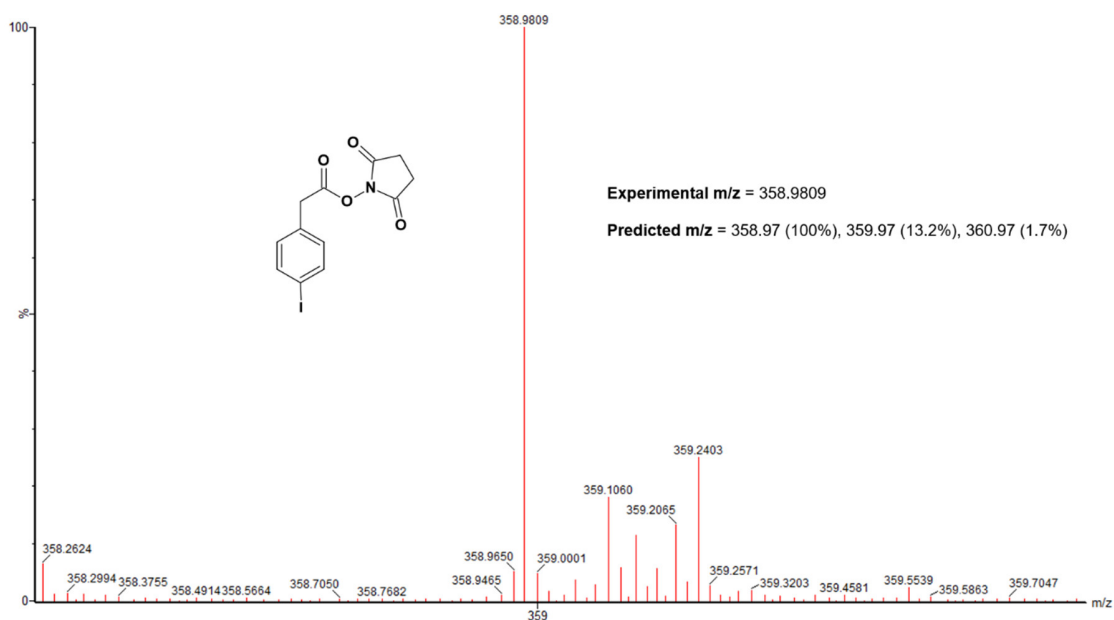

**Figure S12:** ESI-MS spectrum of NHS-4-IPA obtained at 298 K, using a Waters SYNAPT G2-Si quadrupole time-of-flight (QTOF) HDMS. Inset: structure of NHS-4-IPA.

### HPLC chromatograms of platinum(IV) complexes, 1 – 8

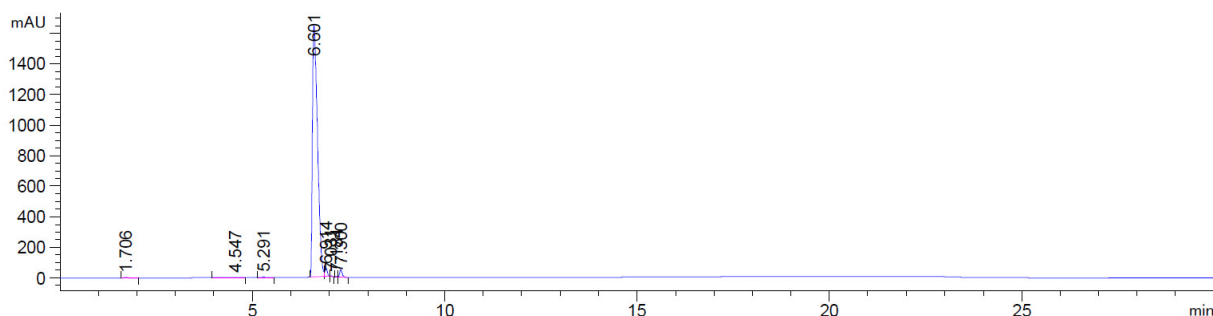

**Figure S13:** HPLC chromatogram of **1** within the collection wavelength of 254 nm obtained at 298 K, by a Phenomenex Onyx™ Monolithic C<sub>18</sub>-reverse phase column (100 × 4.6 mm, 5 μm pore size) using a 0 – 100% linear gradient over 15 min with a flow rate of 1 mL.min<sup>-1</sup>.

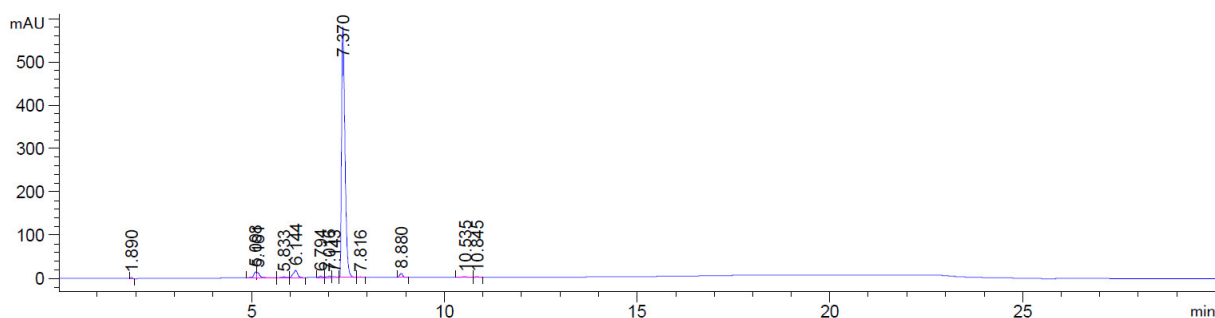

**Figure S14:** HPLC chromatogram of **2** within the collection wavelength of 254 nm obtained at 298 K, by a Phenomenex Onyx™ Monolithic C<sub>18</sub>-reverse phase column (100 × 4.6 mm, 5 μm pore size) using a 0 – 100% linear gradient over 15 min with a flow rate of 1 mL.min<sup>-1</sup>.

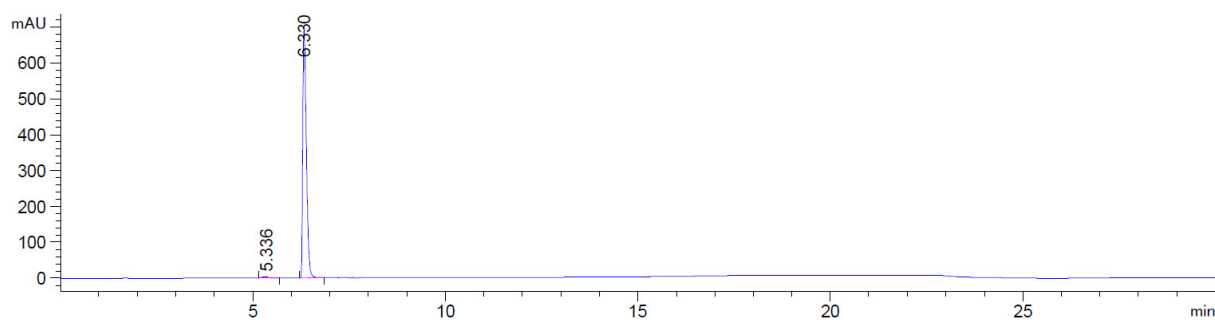

**Figure S15:** HPLC chromatogram of **3** within the collection wavelength of 254 nm obtained at 298 K, by a Phenomenex Onyx™ Monolithic C<sub>18</sub>-reverse phase column (100 × 4.6 mm, 5 μm pore size) using a 0 – 100% linear gradient over 15 min with a flow rate of 1 mL.min<sup>-1</sup>.

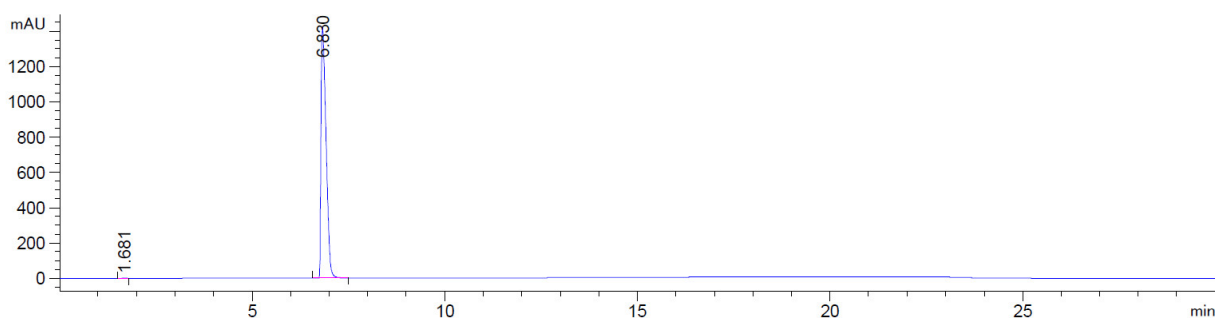

**Figure S16:** HPLC chromatogram of **4** within the collection wavelength of 254 nm obtained at 298 K, by a Phenomenex Onyx™ Monolithic C<sub>18</sub>-reverse phase column (100 × 4.6 mm, 5 μm pore size) using a 0 – 100% linear gradient over 15 min with a flow rate of 1 mL.min<sup>-1</sup>.



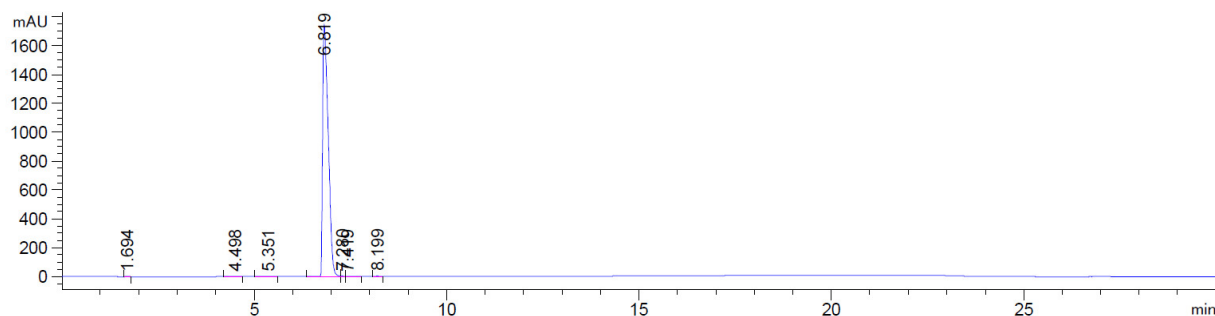

**Figure S17:** HPLC chromatogram of **5** within the collection wavelength of 254 nm obtained at 298 K, by a Phenomenx Onyx™ Monolithic C<sub>18</sub>-reverse phase column (100 × 4.6 mm, 5 μm pore size) using a 0 – 100% linear gradient over 15 min with a flow rate of 1 mL.min<sup>-1</sup>.

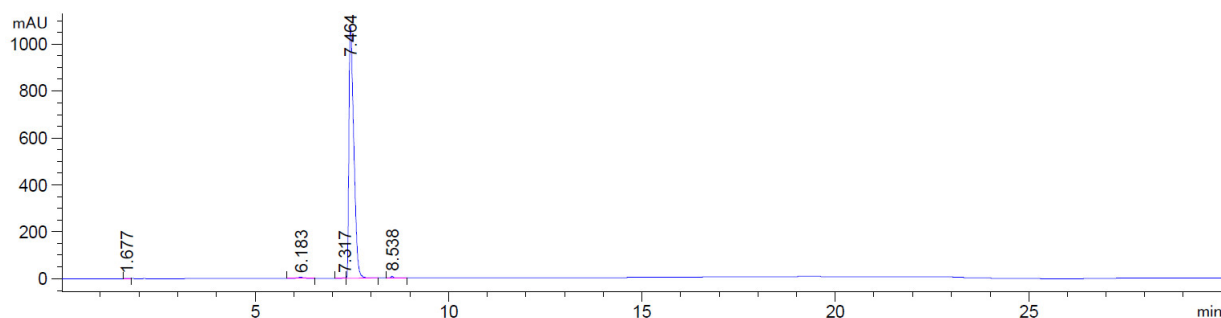

**Figure S18:** HPLC chromatogram of **6** within the collection wavelength of 254 nm obtained at 298 K, by a Phenomenx Onyx™ Monolithic C<sub>18</sub>-reverse phase column (100 × 4.6 mm, 5 μm pore size) using a 0 – 100% linear gradient over 15 min with a flow rate of 1 mL.min<sup>-1</sup>.

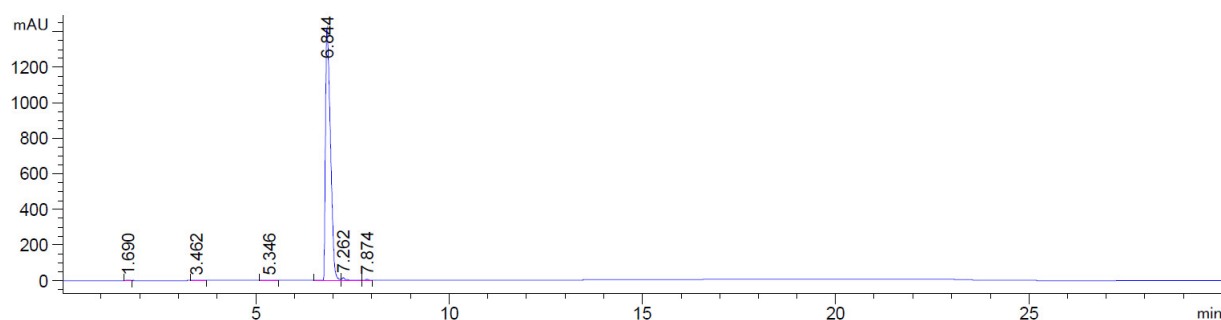

**Figure S19:** HPLC chromatogram of **7** within the collection wavelength of 254 nm obtained at 298 K, by a Phenomenx Onyx™ Monolithic C<sub>18</sub>-reverse phase column (100 × 4.6 mm, 5 μm pore size) using a 0 – 100% linear gradient over 15 min with a flow rate of 1 mL.min<sup>-1</sup>.

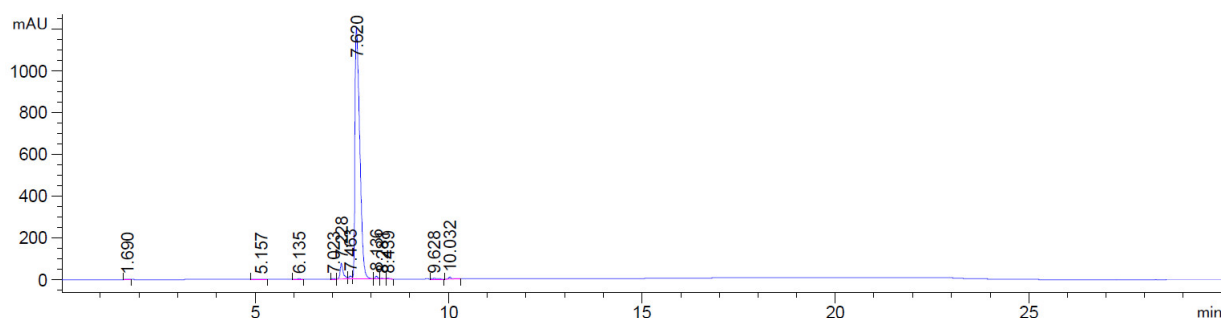

**Figure S20:** HPLC chromatogram of **8** within the collection wavelength of 254 nm obtained at 298 K, by a Phenomenx Onyx™ Monolithic C<sub>18</sub>-reverse phase column (100 × 4.6 mm, 5 μm pore size) using a 0 – 100% linear gradient over 15 min with a flow rate of 1 mL.min<sup>-1</sup>.

**$^1\text{H}$ -NMR, 2D-COSY and  $^1\text{H}$ - $^{195}\text{Pt}$ -HMQC spectra of 1 – 8**

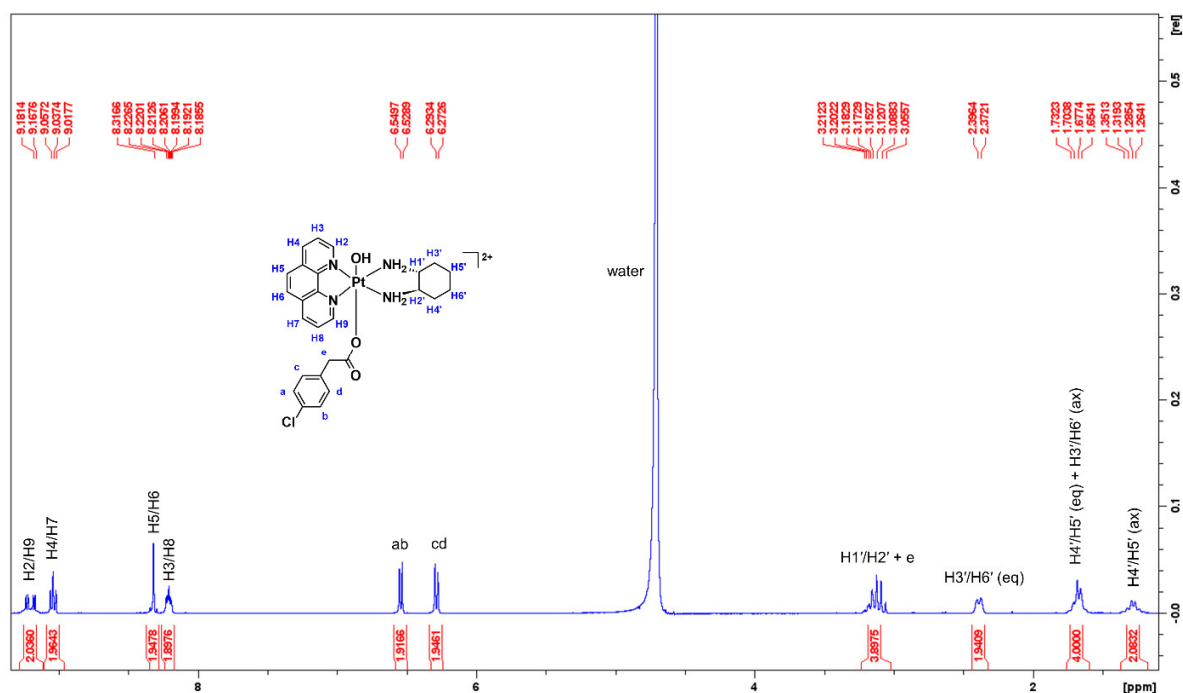

**Figure S21:**  $^1\text{H}$ -NMR spectrum of **1** in  $\text{D}_2\text{O}$  obtained at 298 K Inset: structure of **1** with proton labelling system.

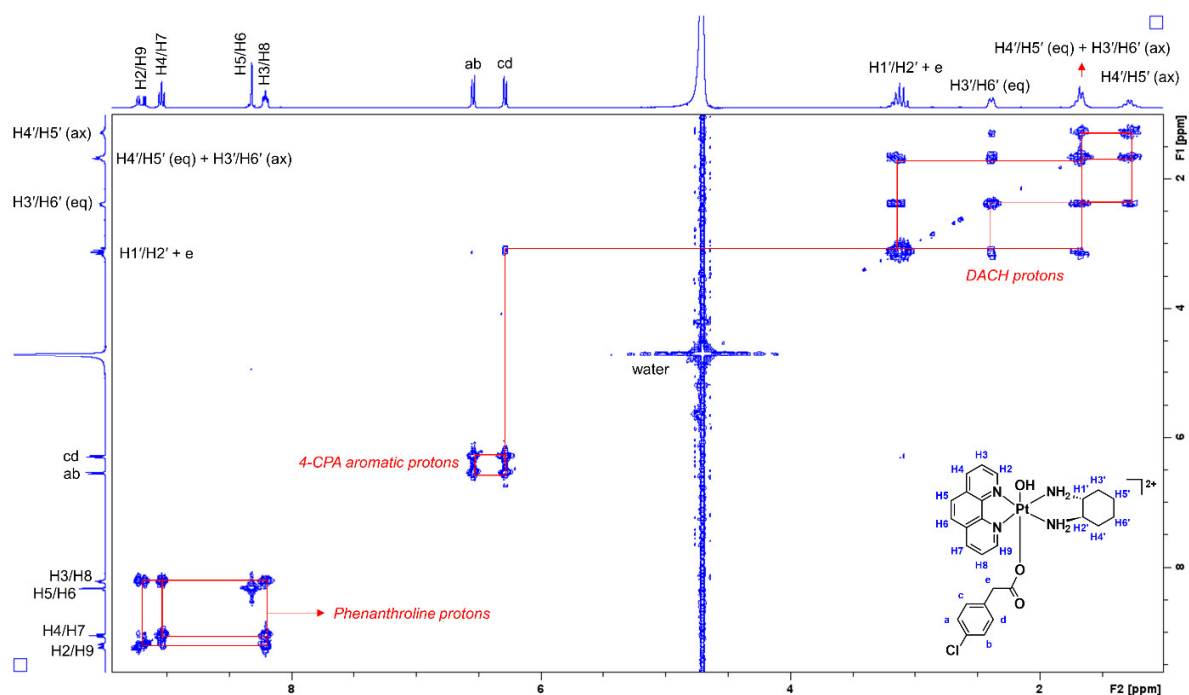

**Figure S22:** 2D-COSY spectrum of **1** in D<sub>2</sub>O obtained at 298 K. Inset: structure of **1** with proton labelling system.

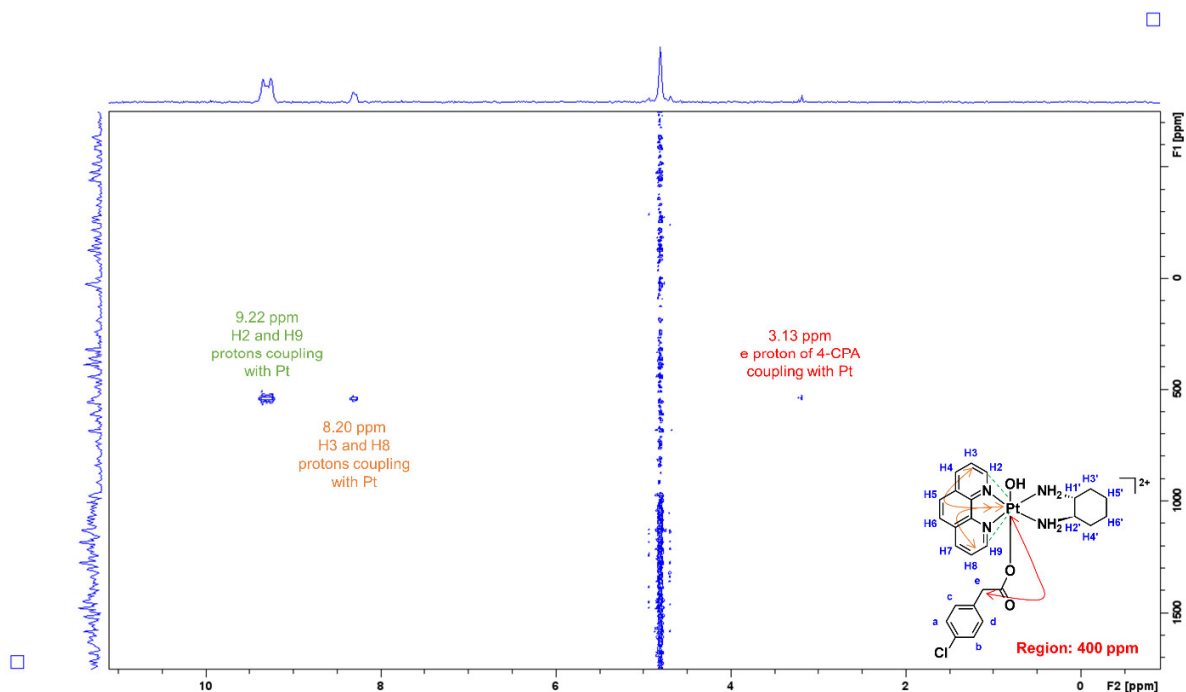

**Figure S23:**  $^1\text{H}$ - $^{195}\text{Pt}$ -HMQC spectrum of **1** in  $\text{D}_2\text{O}$  obtained at 298 K. Region: 400 ppm. Inset: structure of **1** with proton labelling system and arrows that indicate coupling.

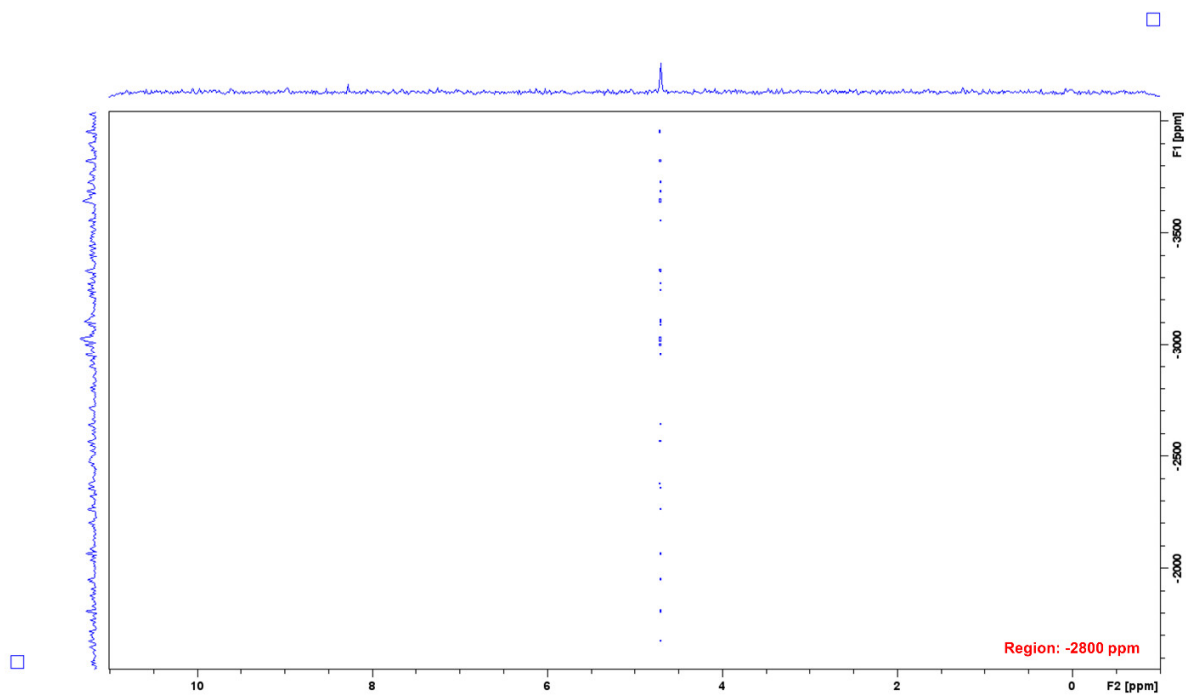

**Figure S24:**  $^1\text{H}$ - $^{195}\text{Pt}$ -HMQC spectrum of **1** in  $\text{D}_2\text{O}$  obtained at 298 K. Region: -2800 ppm. Absence of platinum(II) resonance.

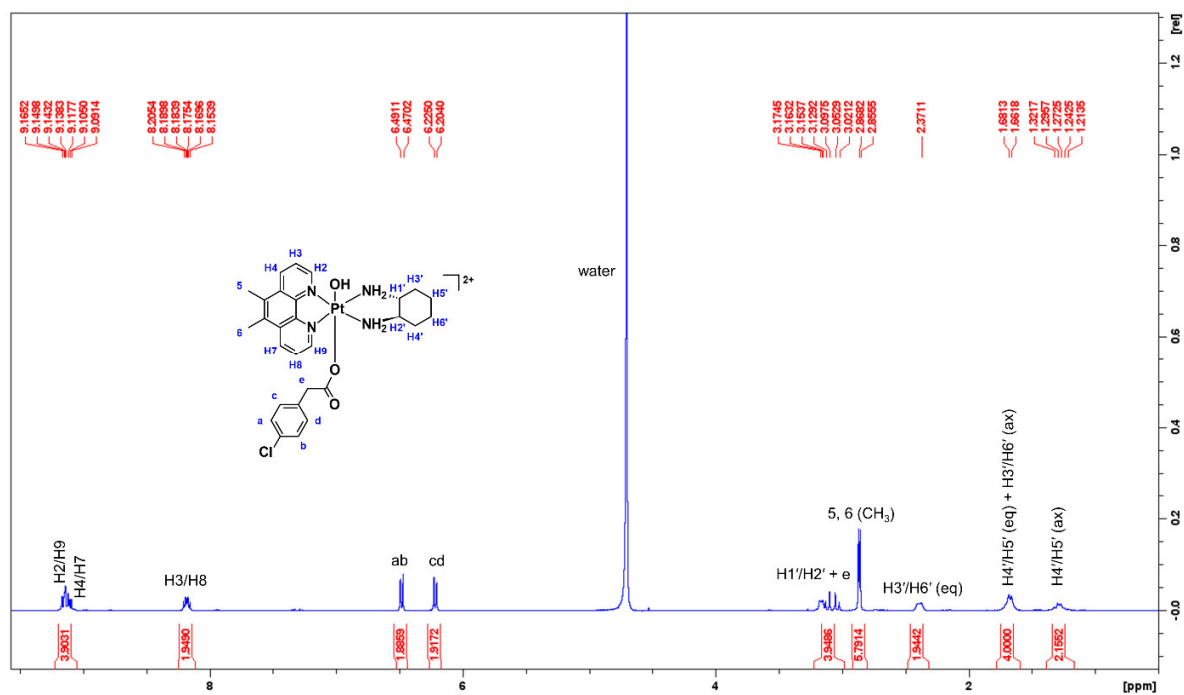

**Figure S25:**  $^1\text{H}$ -NMR spectrum of **2** in  $\text{D}_2\text{O}$  obtained at 298 K Inset: structure of **2** with proton labelling system.

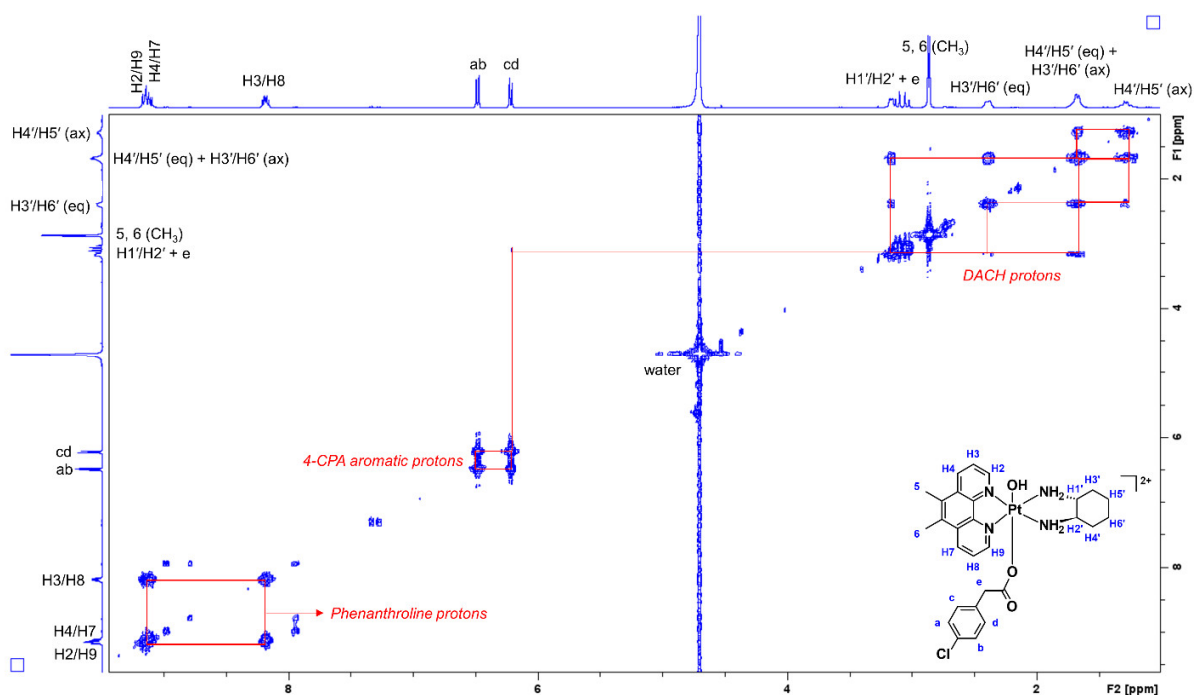

**Figure S26:** 2D-COSY spectrum of **2** in D<sub>2</sub>O obtained at 298 K. Inset: structure of **2** with proton labelling system.



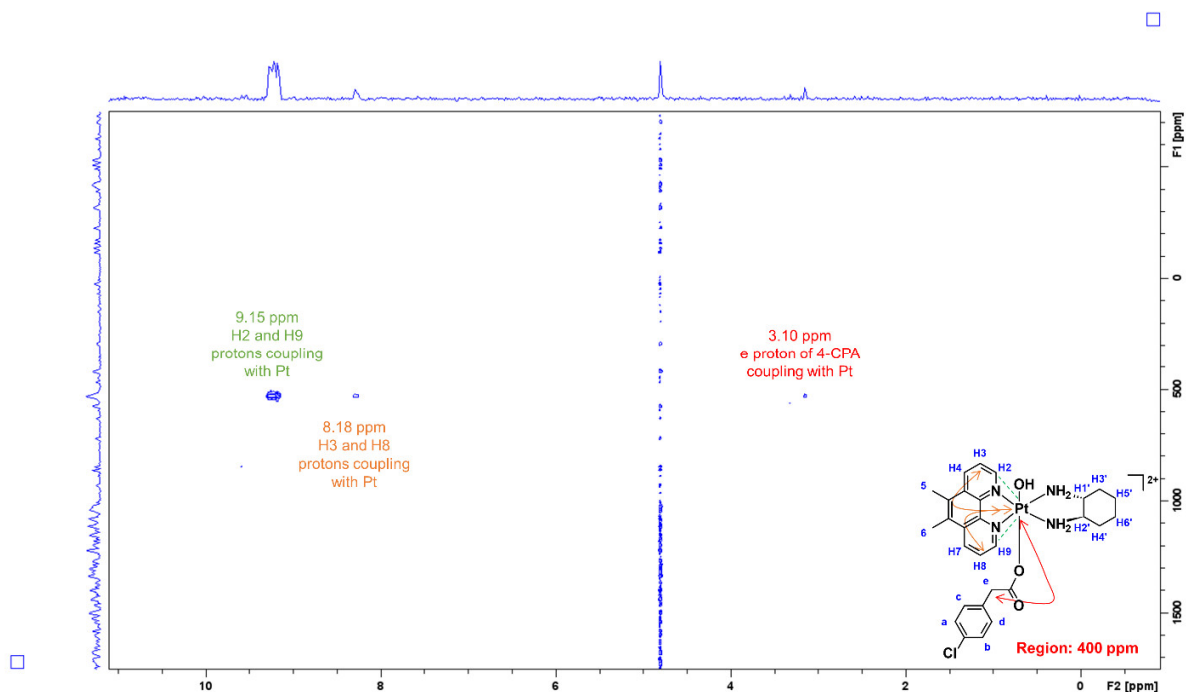

**Figure S27:**  $^1\text{H}$ - $^{195}\text{Pt}$ -HMQC spectrum of **2** in  $\text{D}_2\text{O}$  obtained at 298 K. Region: 400 ppm. Inset: structure of **2** with proton labelling system and arrows that indicate coupling.

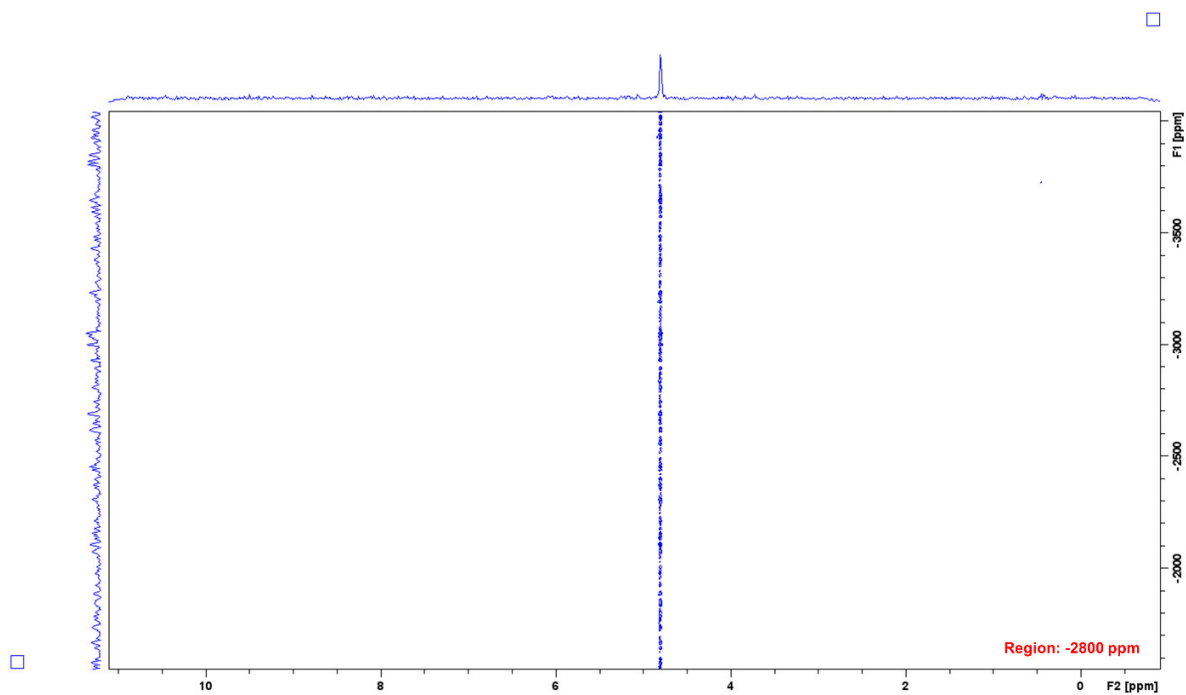

**Figure S28:**  $^1\text{H}$ - $^{195}\text{Pt}$ -HMQC spectrum of **2** in  $\text{D}_2\text{O}$  obtained at 298 K. Region: -2800 ppm. Absence of platinum(II) resonance.

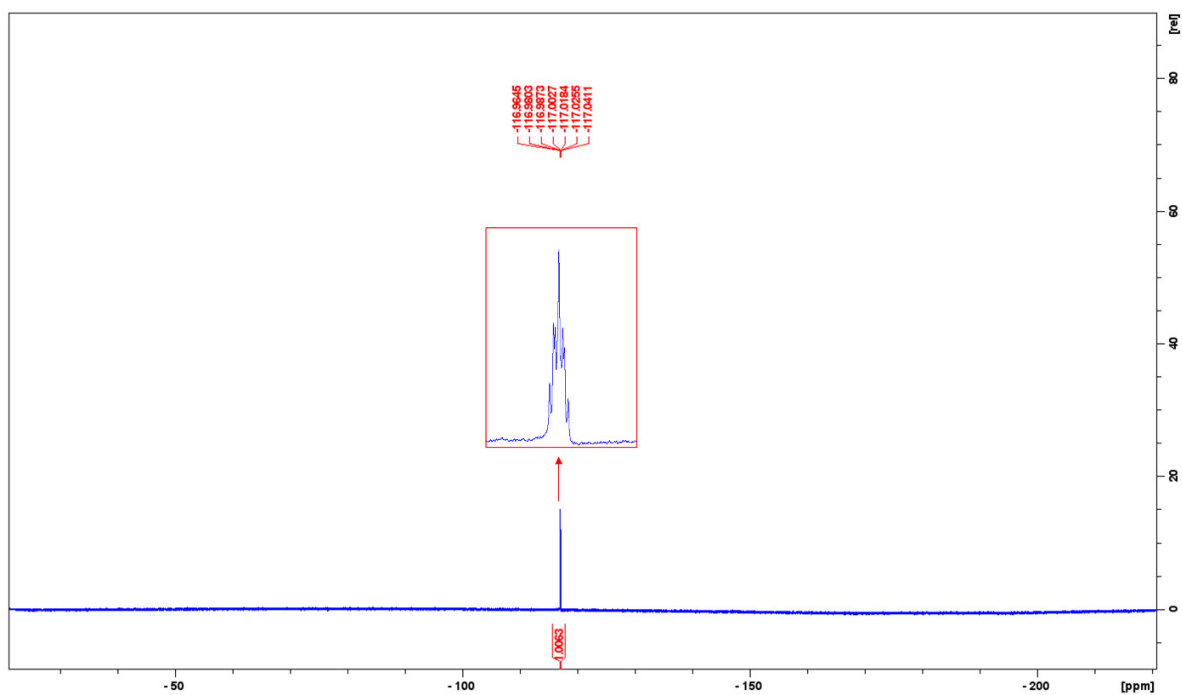

**Figure S29:**  $^{19}\text{F}$ -NMR spectrum of **3** in  $\text{D}_2\text{O}$  obtained at 298 K.

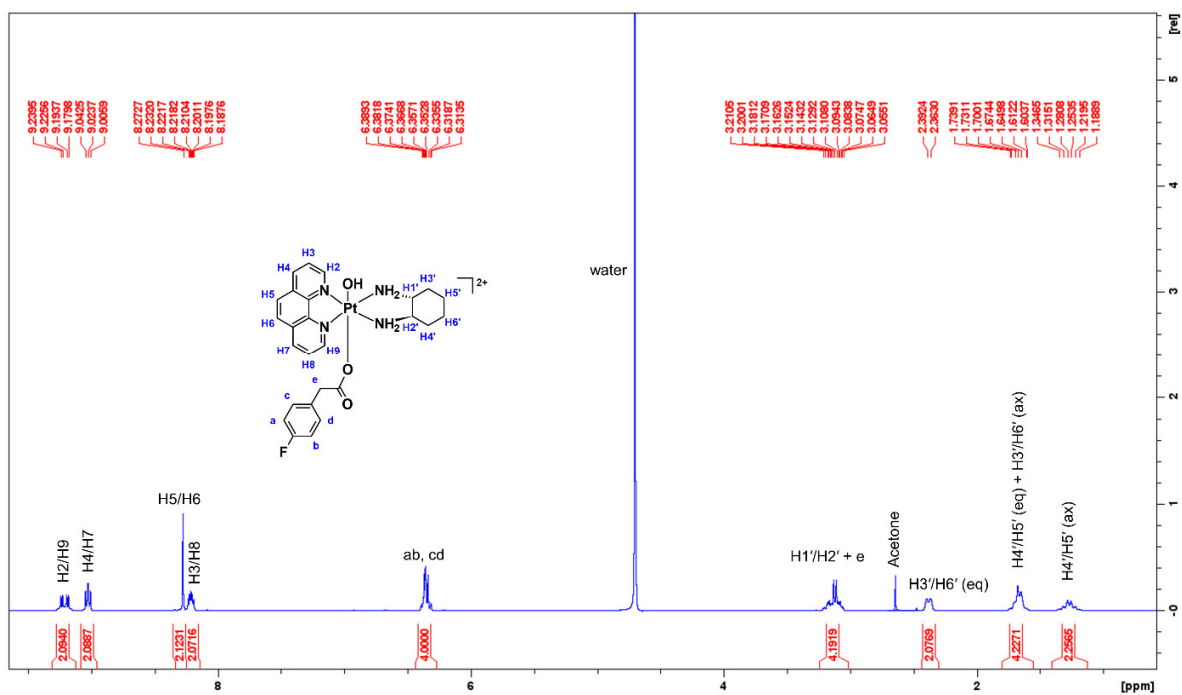

**Figure S30:**  $^1\text{H}$ -NMR spectrum of **3** in  $\text{D}_2\text{O}$  obtained at 298 K Inset: structure of **3** with proton labelling system.

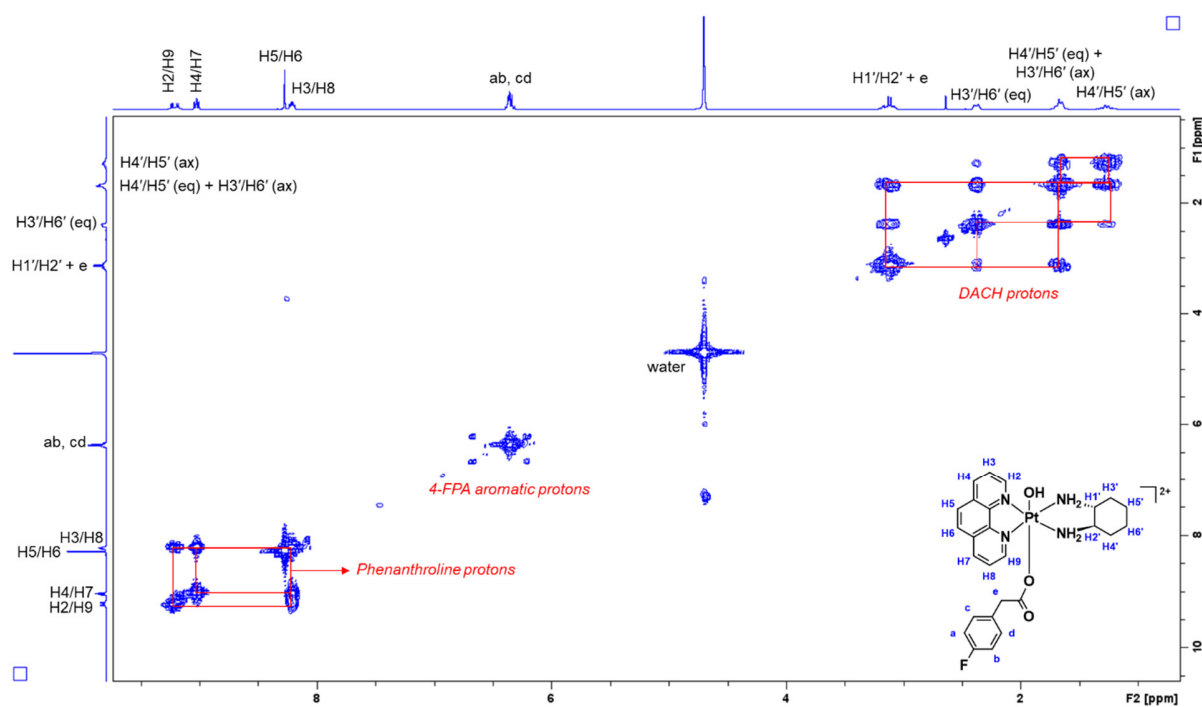

**Figure S31:** 2D-COSY spectrum of **3** in D<sub>2</sub>O obtained at 298 K. Inset: structure of **3** with proton labelling system.

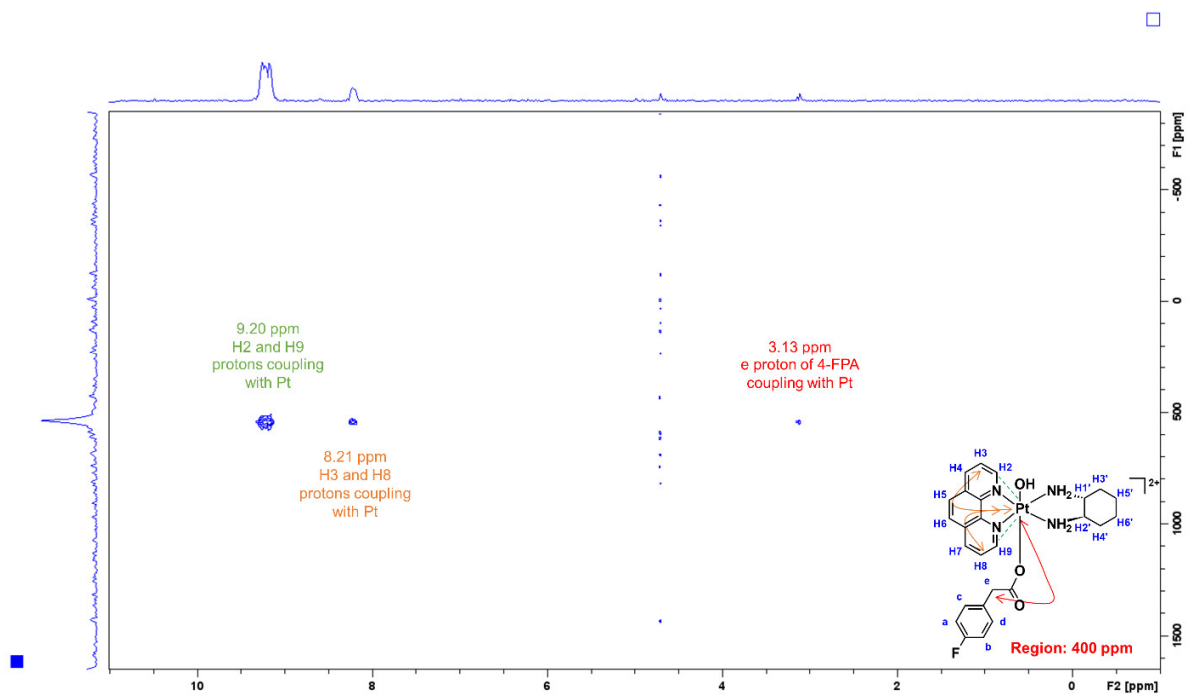

**Figure S32:**  $^1\text{H}$ - $^{195}\text{Pt}$ -HMQC spectrum of **3** in  $\text{D}_2\text{O}$  obtained at 298 K. Region: 400 ppm. Inset: structure of **3** with proton labelling system and arrows that indicate coupling.

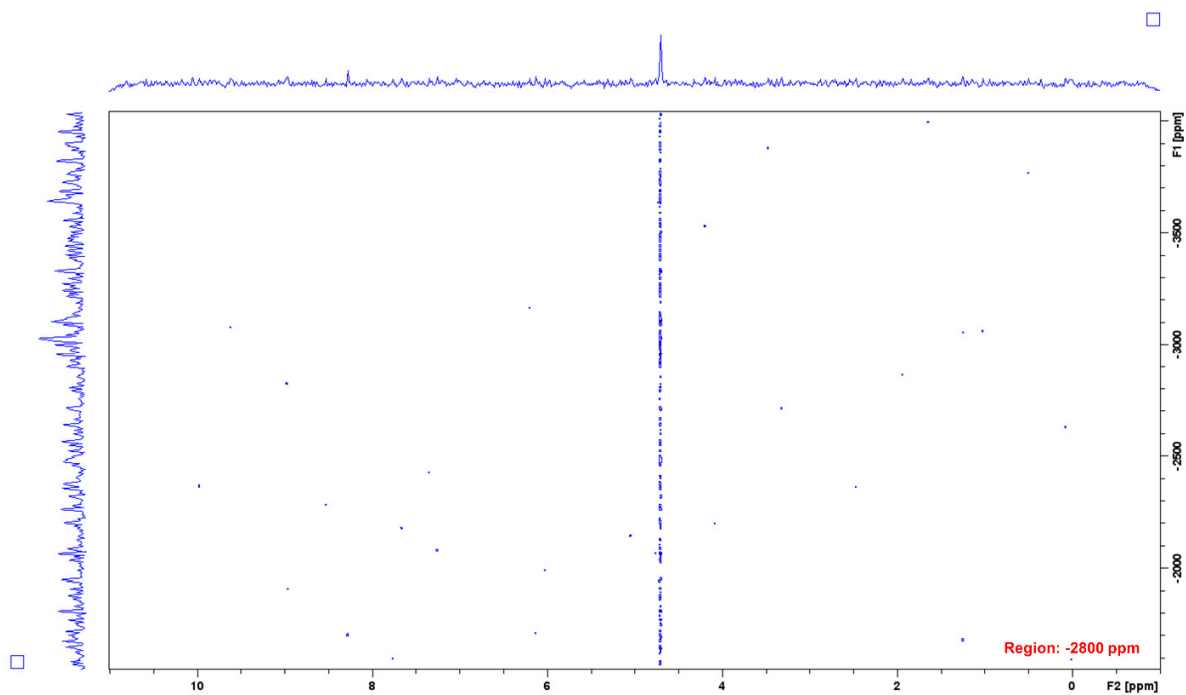

**Figure S33:**  $^1\text{H}$ - $^{195}\text{Pt}$ -HMQC spectrum of **3** in  $\text{D}_2\text{O}$  obtained at 298 K. Region: -2800 ppm. Absence of platinum(II) resonance.

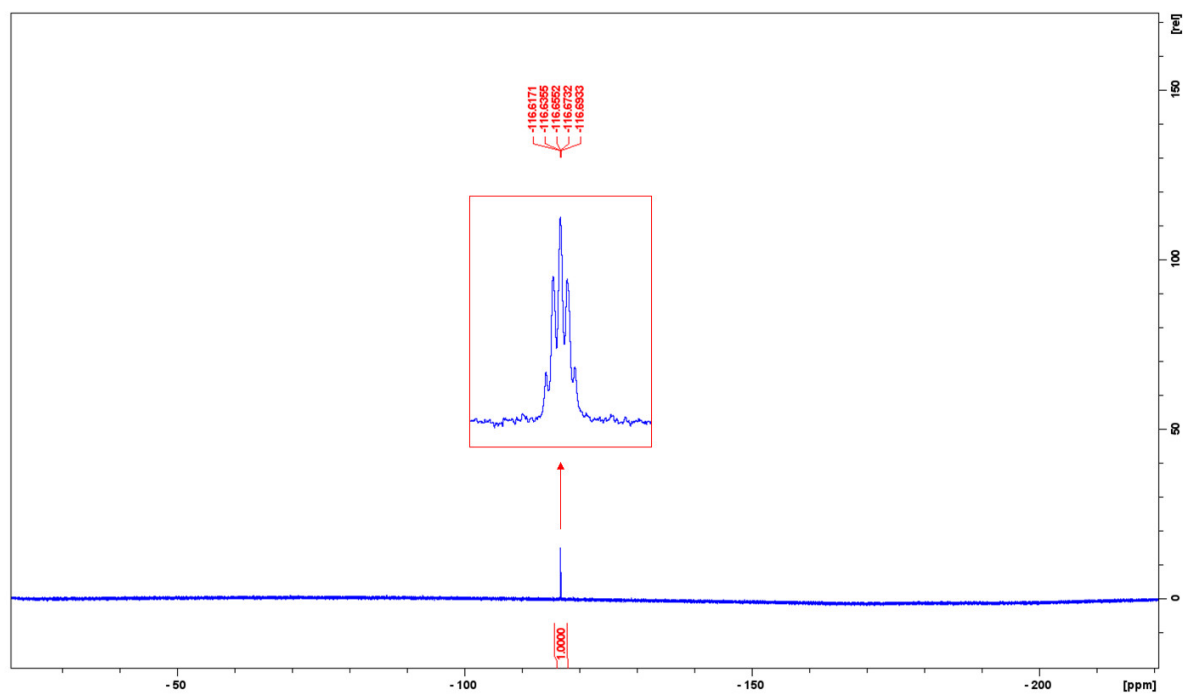

**Figure S34:**  $^{19}\text{F}$ -NMR spectrum of **4** in  $\text{D}_2\text{O}$  obtained at 298 K.

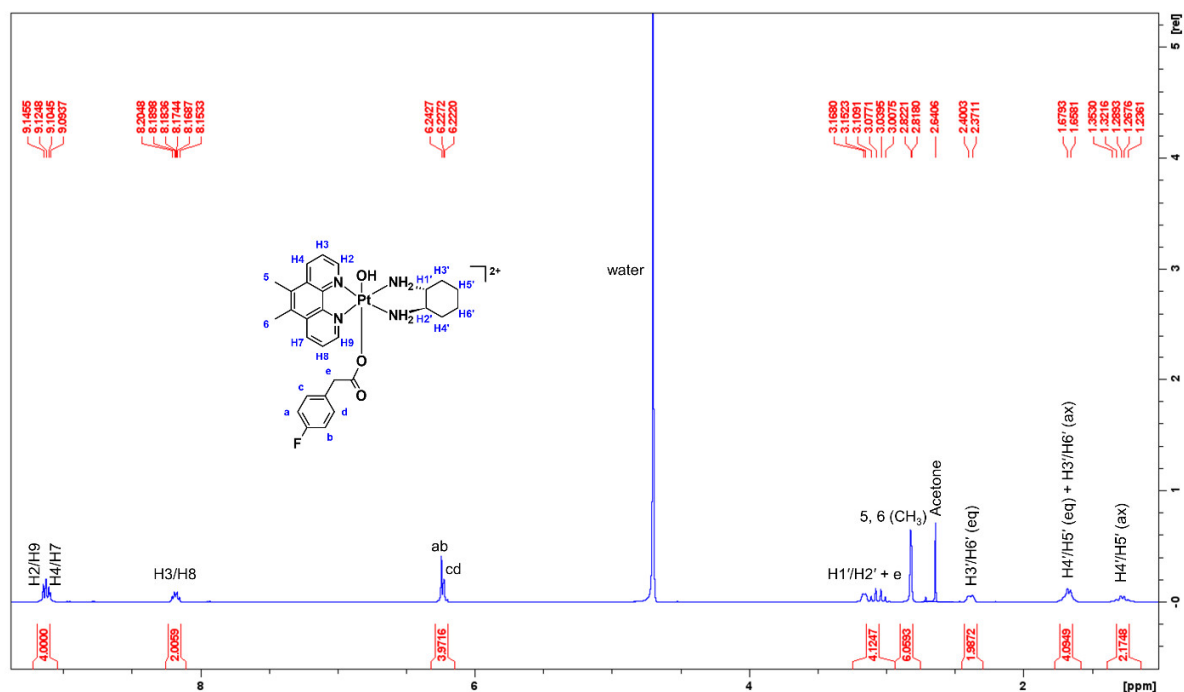

**Figure S35:** <sup>1</sup>H-NMR spectrum of **4** in D<sub>2</sub>O obtained at 298 K Inset: structure of **4** with proton labelling system.



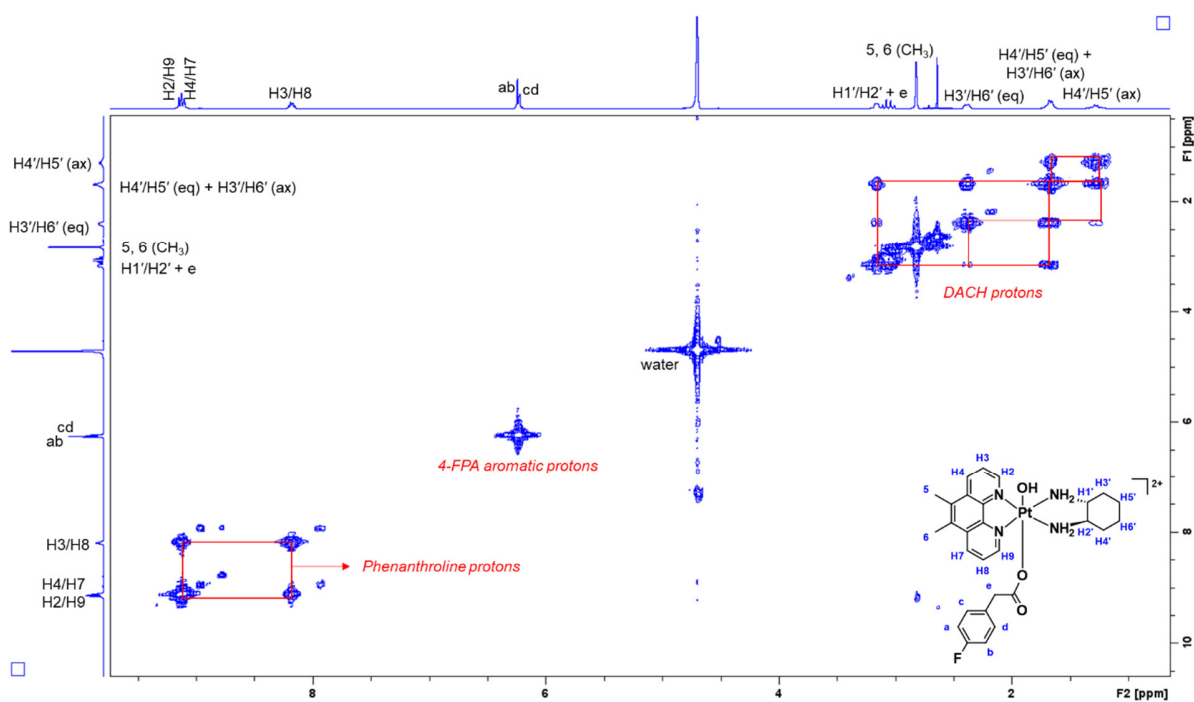

**Figure S36:** 2D-COSY spectrum of **4** in D<sub>2</sub>O obtained at 298 K. Inset: structure of **4** with proton labelling system.

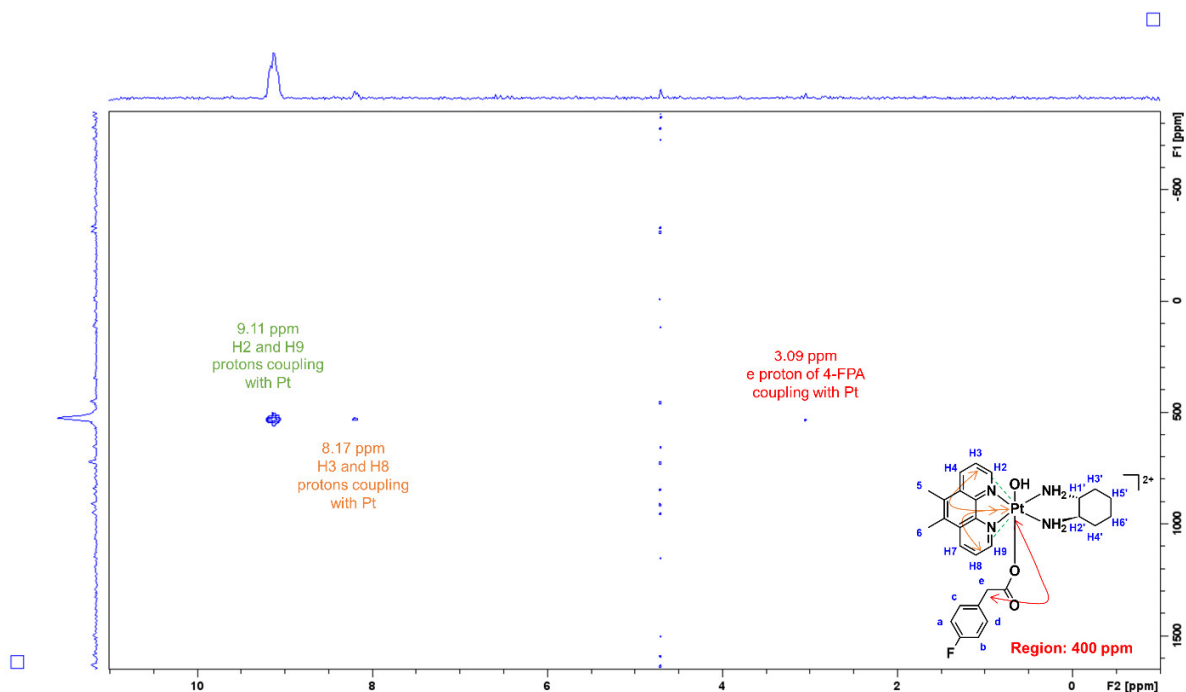

**Figure S37:**  $^1\text{H}$ - $^{195}\text{Pt}$ -HMQC spectrum of **4** in  $\text{D}_2\text{O}$  obtained at 298 K. Region: 400 ppm. Inset: structure of **4** with proton labelling system and arrows that indicate coupling.

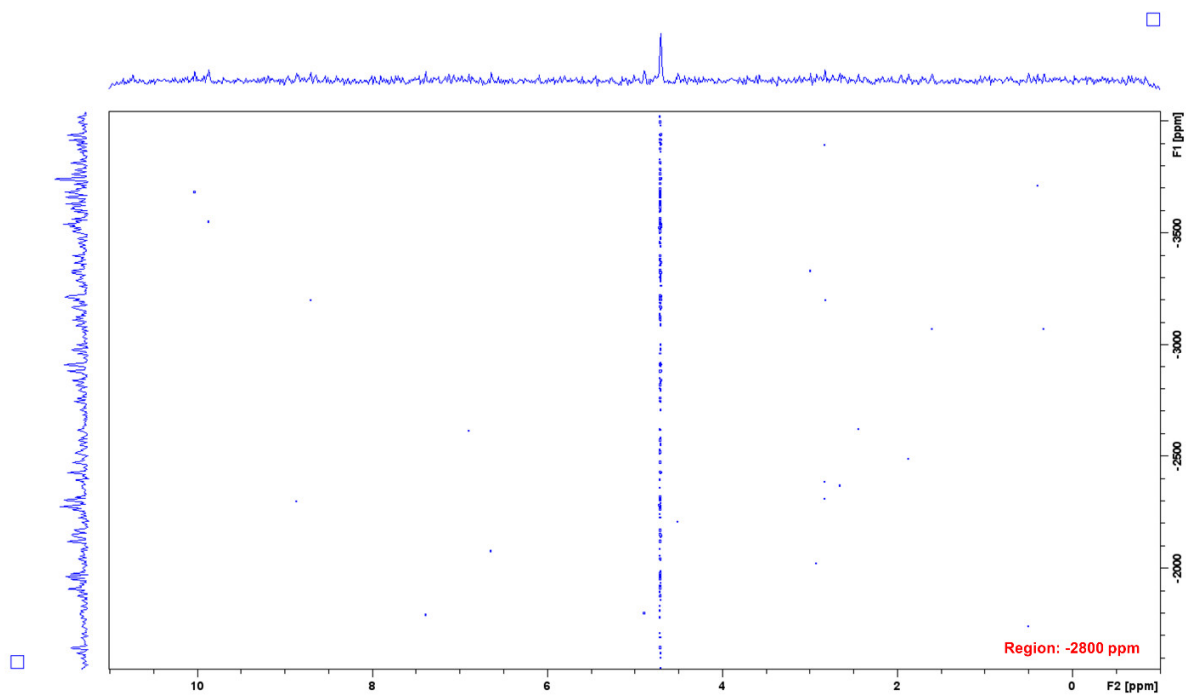

**Figure S38:**  $^1\text{H}$ - $^{195}\text{Pt}$ -HMQC spectrum of **4** in  $\text{D}_2\text{O}$  obtained at 298 K. Region: -2800 ppm. Absence of platinum(II) resonance.

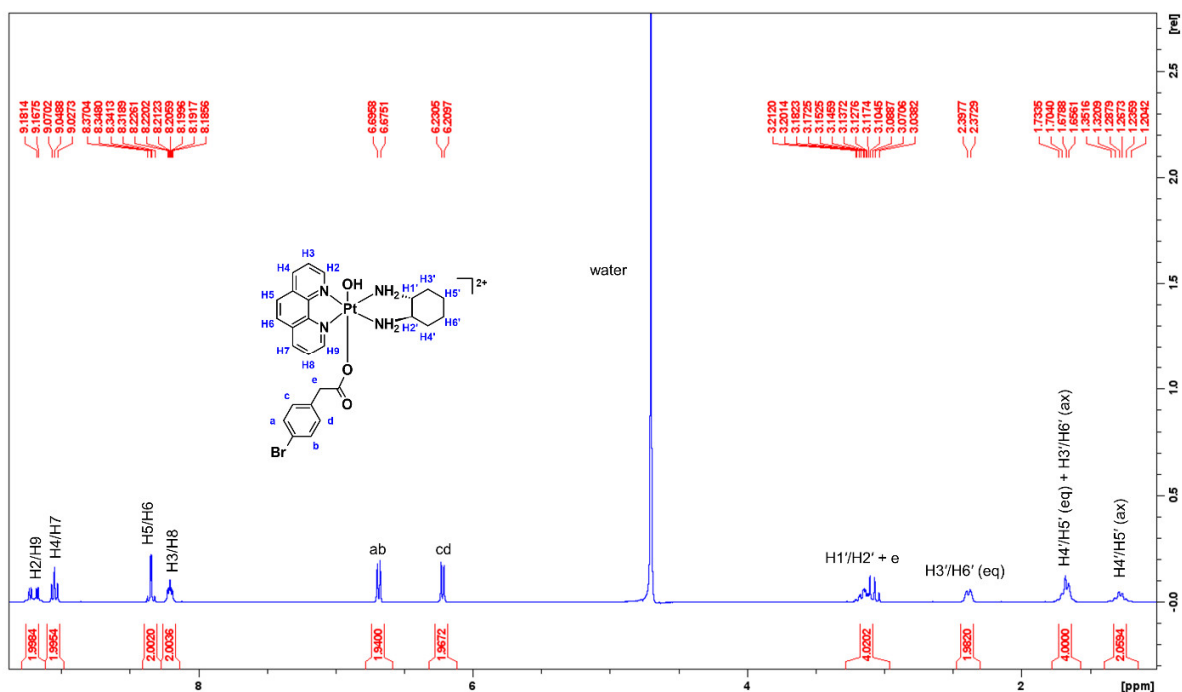

**Figure S39:**  $^1\text{H}$ -NMR spectrum of **5** in  $\text{D}_2\text{O}$  obtained at 298 K Inset: structure of **5** with proton labelling system.

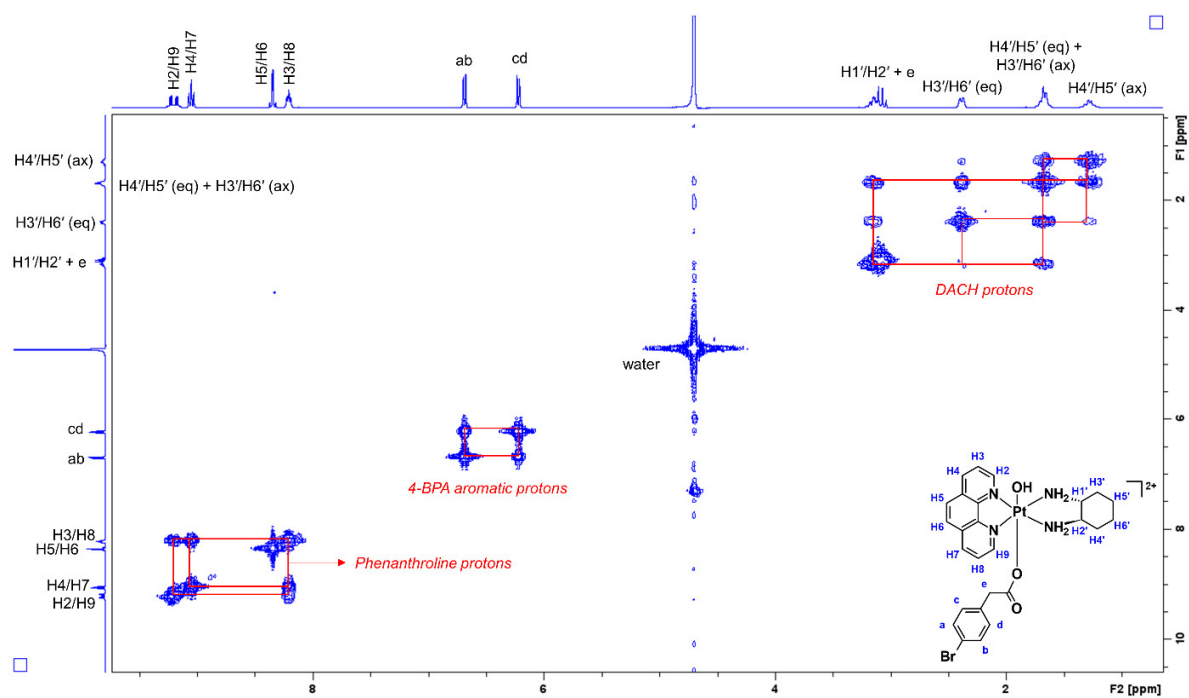

**Figure S40:** 2D-COSY spectrum of **5** in D<sub>2</sub>O obtained at 298 K. Inset: structure of **5** with proton labelling system.

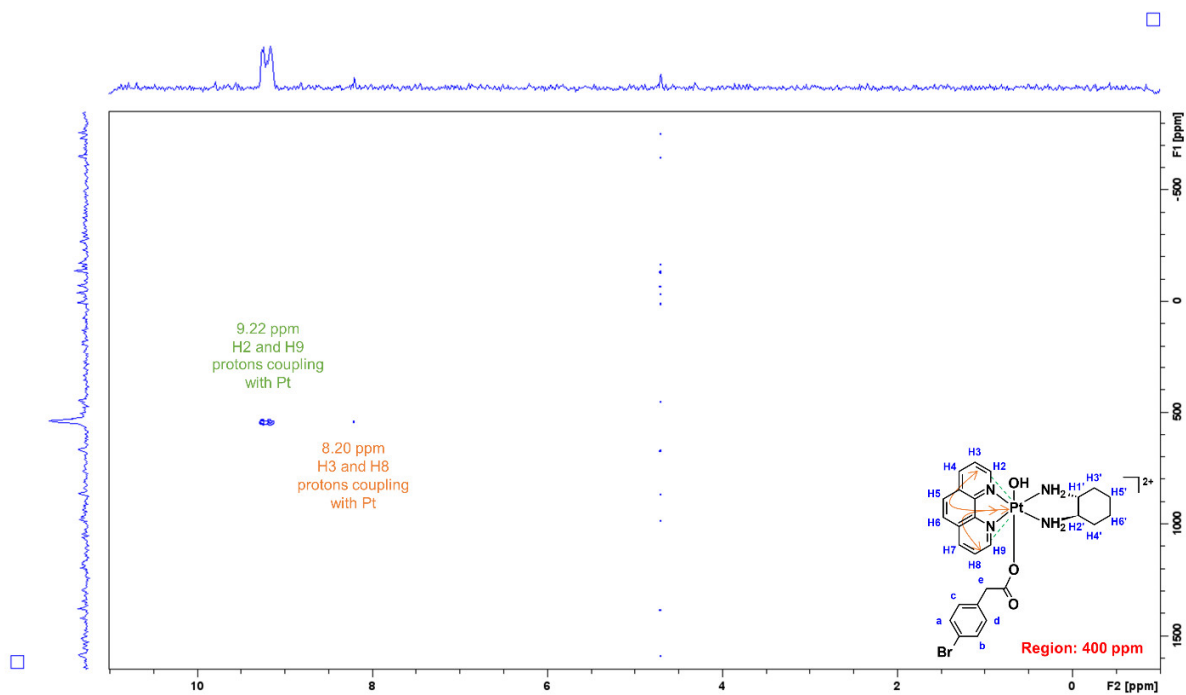

**Figure S41:**  $^1\text{H}$ - $^{195}\text{Pt}$ -HMQC spectrum of **5** in  $\text{D}_2\text{O}$  obtained at 298 K. Region: 400 ppm. Inset: structure of **5** with proton labelling system and arrows that indicate coupling.

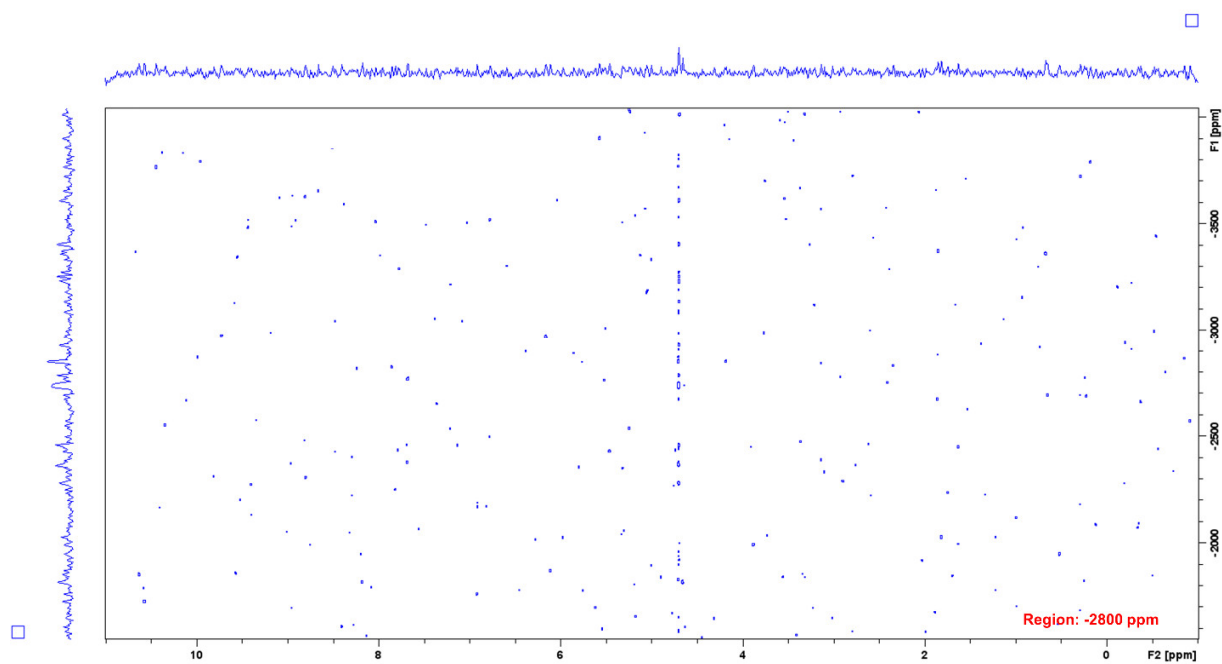

**Figure S42:**  $^1\text{H}$ - $^{195}\text{Pt}$ -HMQC spectrum of **5** in  $\text{D}_2\text{O}$  obtained at 298 K. Region: -2800 ppm. Absence of platinum(II) resonance.

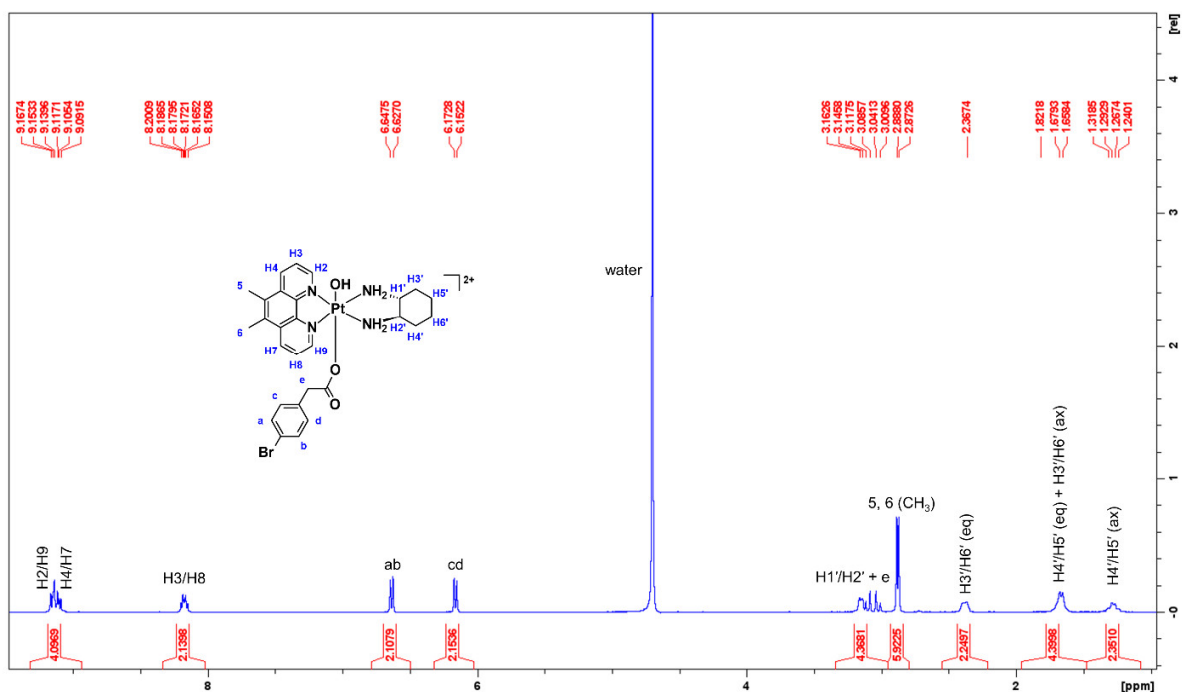

**Figure S43:**  $^1\text{H}$ -NMR spectrum of **6** in  $\text{D}_2\text{O}$  obtained at 298 K Inset: structure of **6** with proton labelling system.



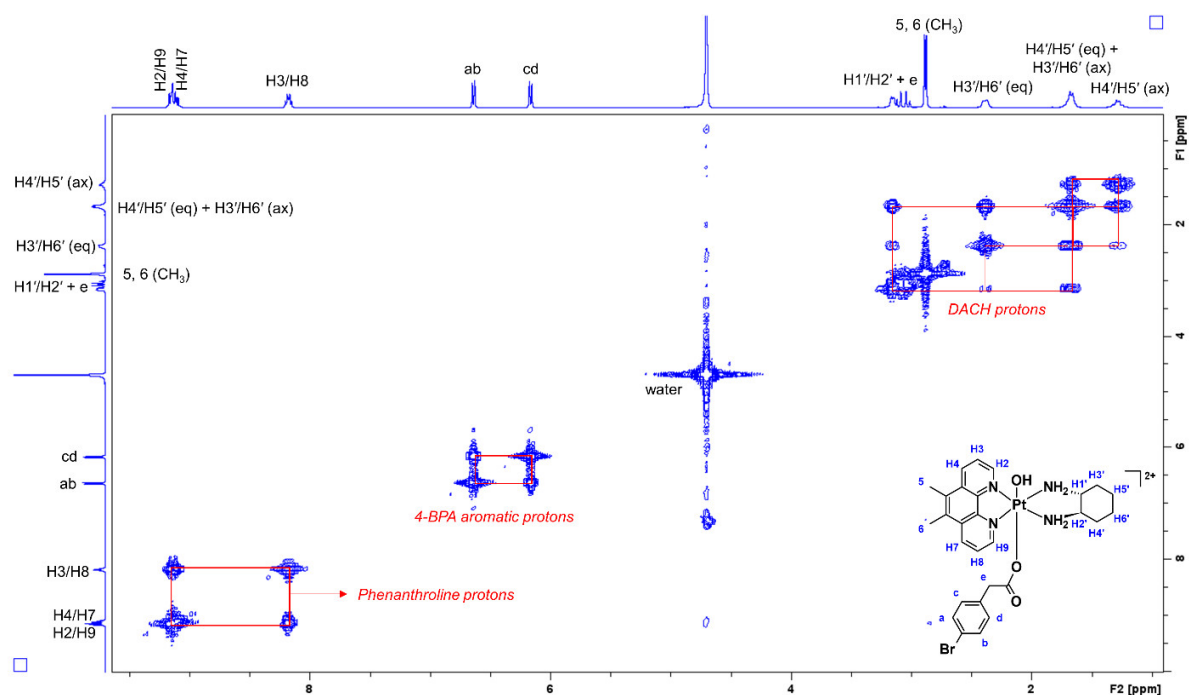

**Figure S44:** 2D-COSY spectrum of **6** in D<sub>2</sub>O obtained at 298 K. Inset: structure of **6** with proton labelling system.

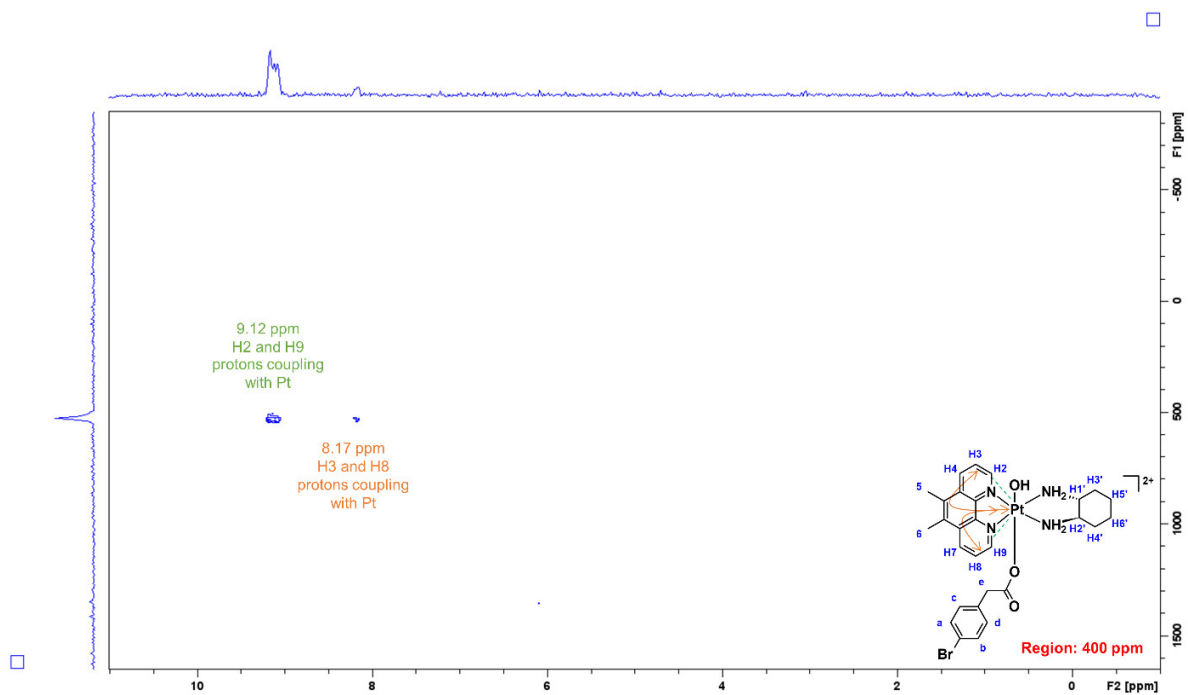

**Figure S45:**  $^1\text{H}$ - $^{195}\text{Pt}$ -HMQC spectrum of **6** in  $\text{D}_2\text{O}$  obtained at 298 K. Region: 400 ppm. Inset: structure of **6** with proton labelling system and arrows that indicate coupling.

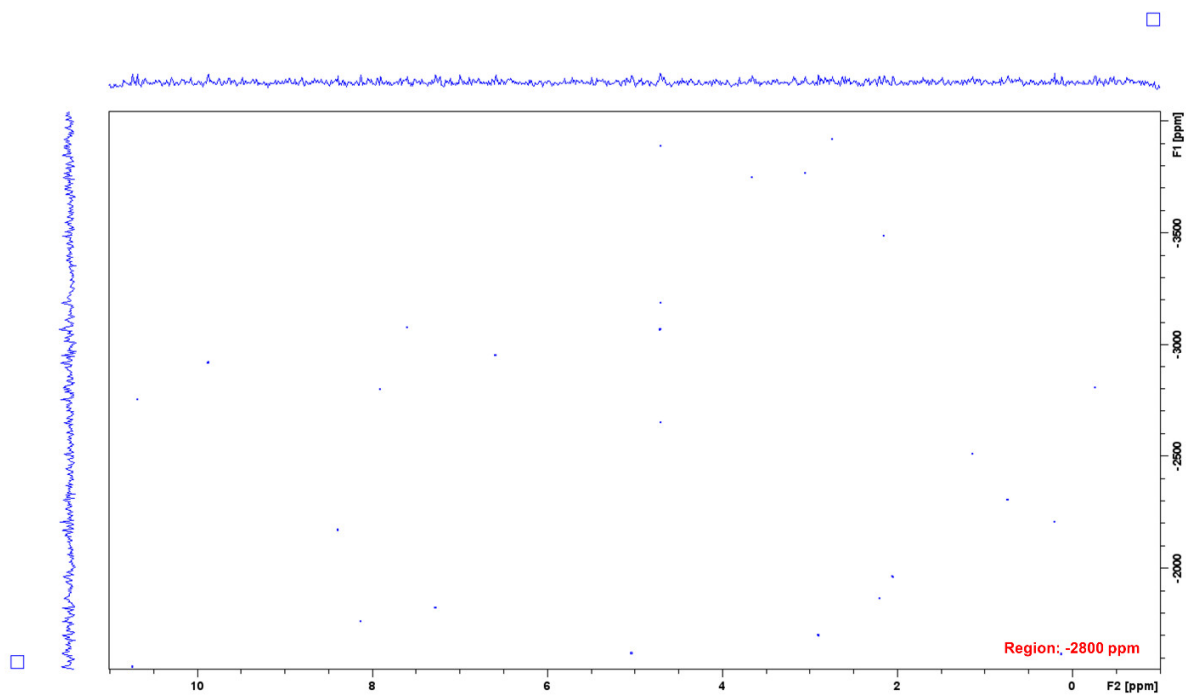

**Figure S46:**  $^1\text{H}$ - $^{195}\text{Pt}$ -HMQC spectrum of **6** in  $\text{D}_2\text{O}$  obtained at 298 K. Region: -2800 ppm. Absence of platinum(II) resonance.

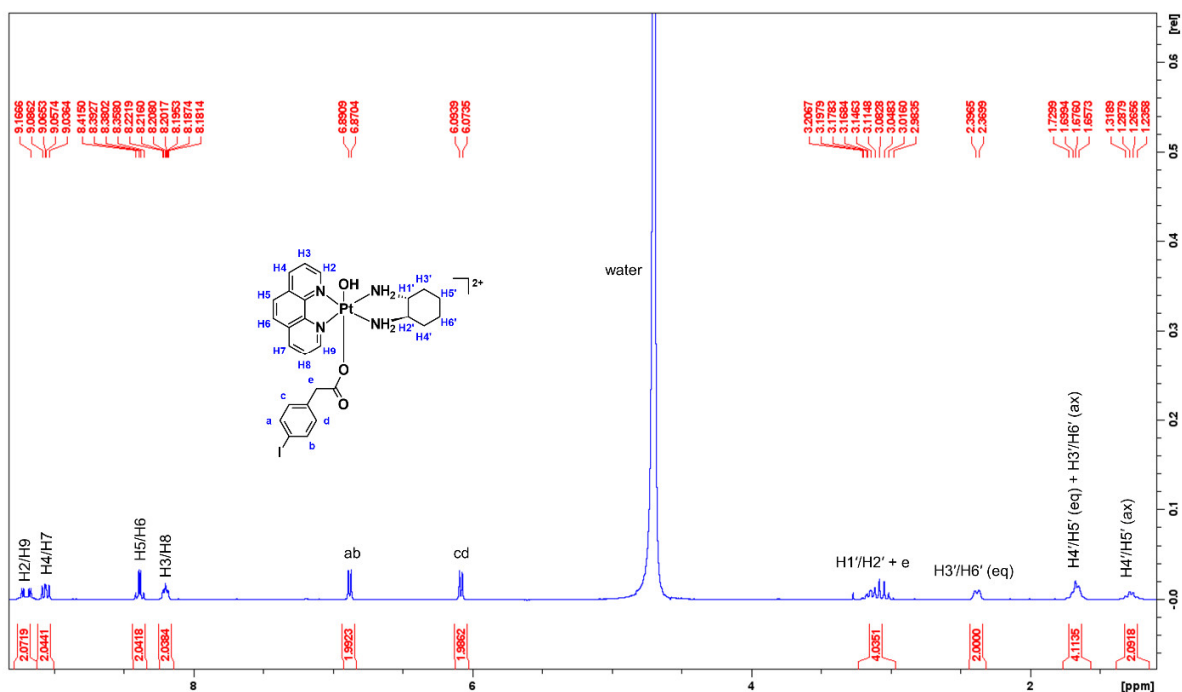

**Figure S47:**  $^1\text{H}$ -NMR spectrum of **7** in D<sub>2</sub>O obtained at 298 K Inset: structure of **7** with proton labelling system.

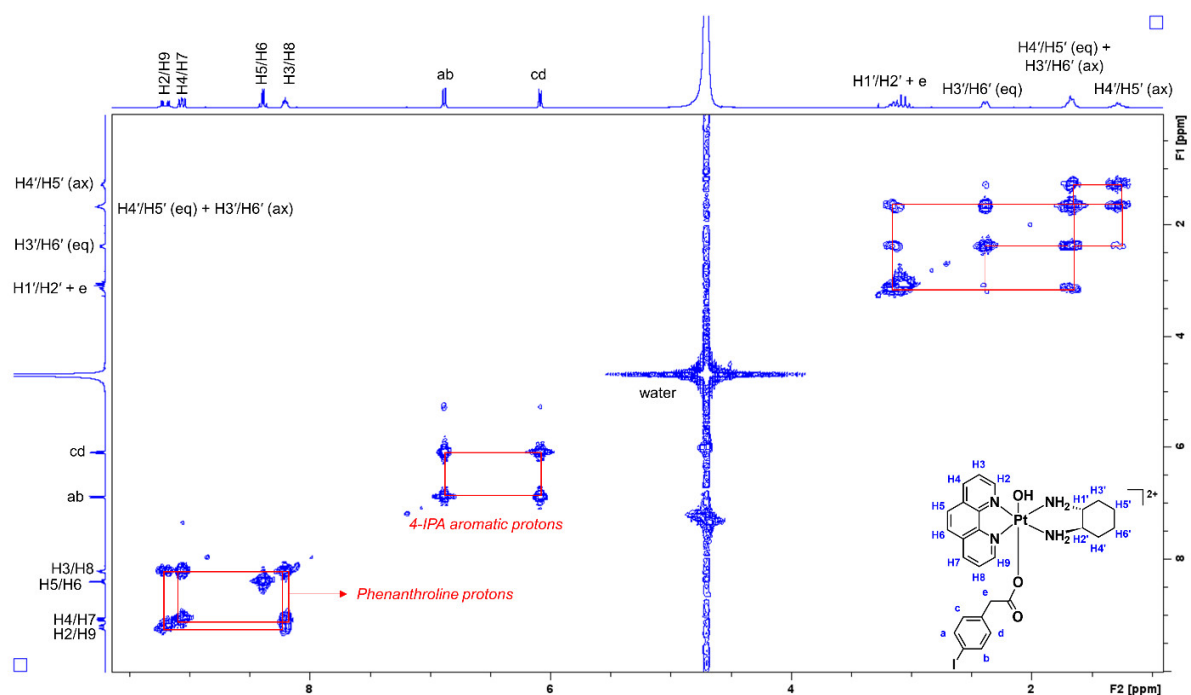

**Figure S48:** 2D-COSY spectrum of **7** in D<sub>2</sub>O obtained at 298 K. Inset: structure of **7** with proton labelling system.

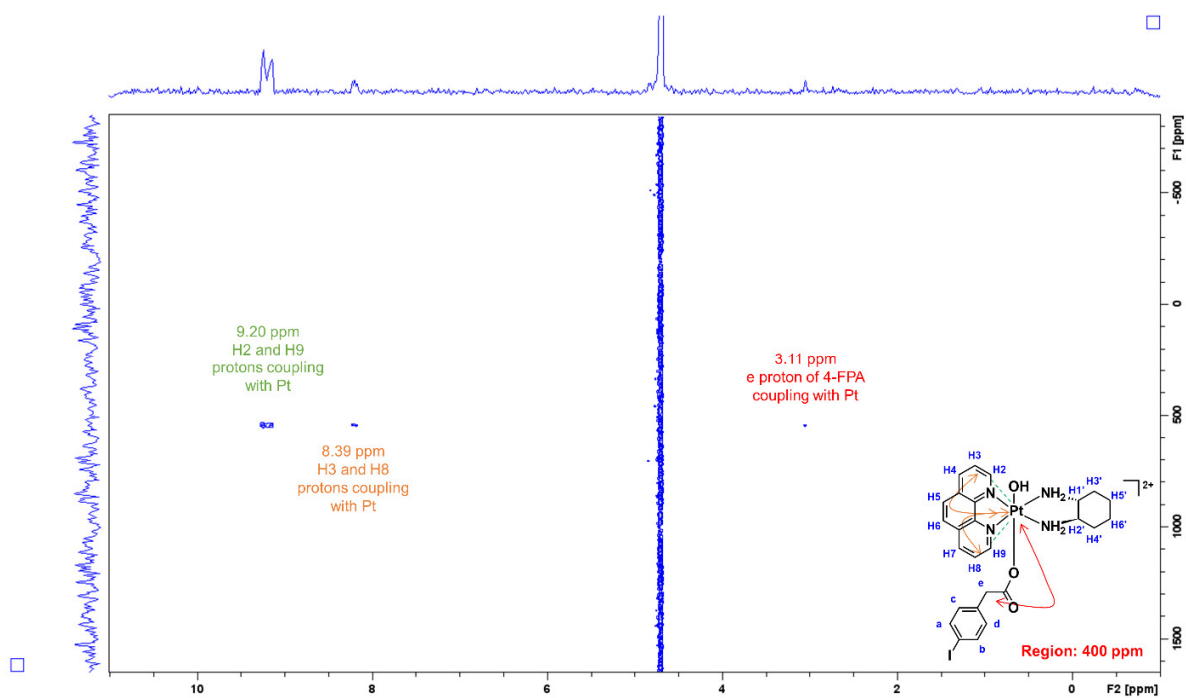

**Figure S49:**  $^1\text{H}$ - $^{195}\text{Pt}$ -HMQC spectrum of **7** in  $\text{D}_2\text{O}$  obtained at 298 K. Region: 400 ppm. Inset: structure of **7** with proton labelling system and arrows that indicate coupling.

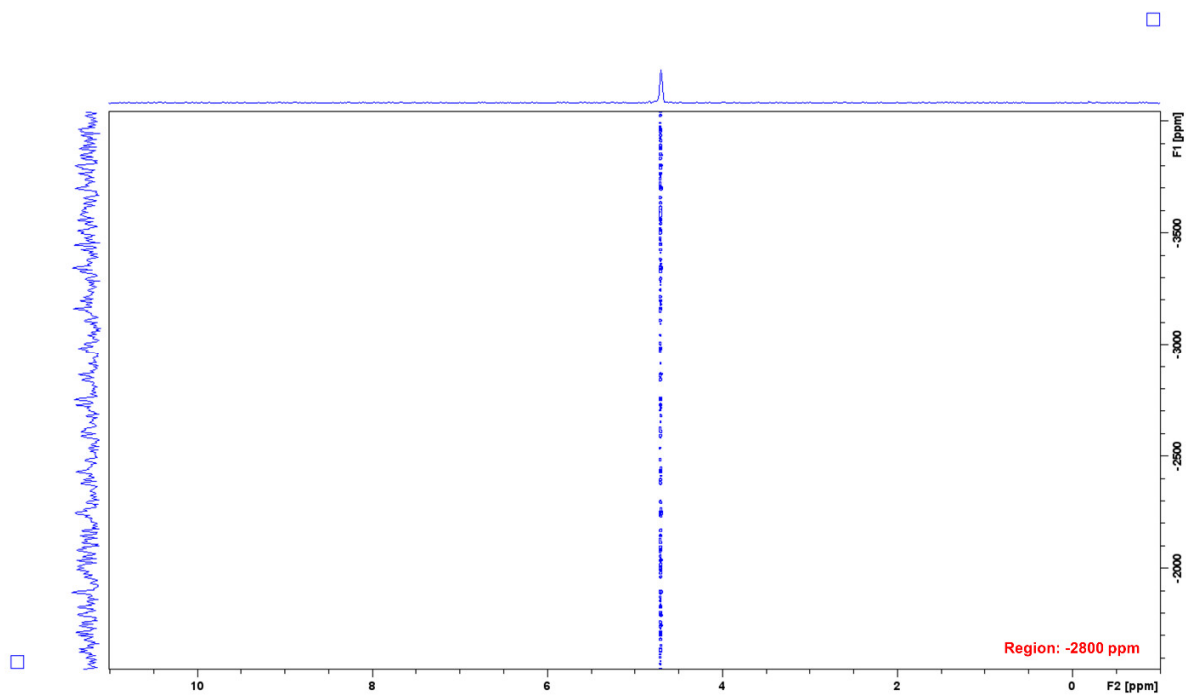

**Figure S50:**  $^1\text{H}$ - $^{195}\text{Pt}$ -HMQC spectrum of **7** in  $\text{D}_2\text{O}$  obtained at 298 K. Region: -2800 ppm. Absence of platinum(II) resonance.

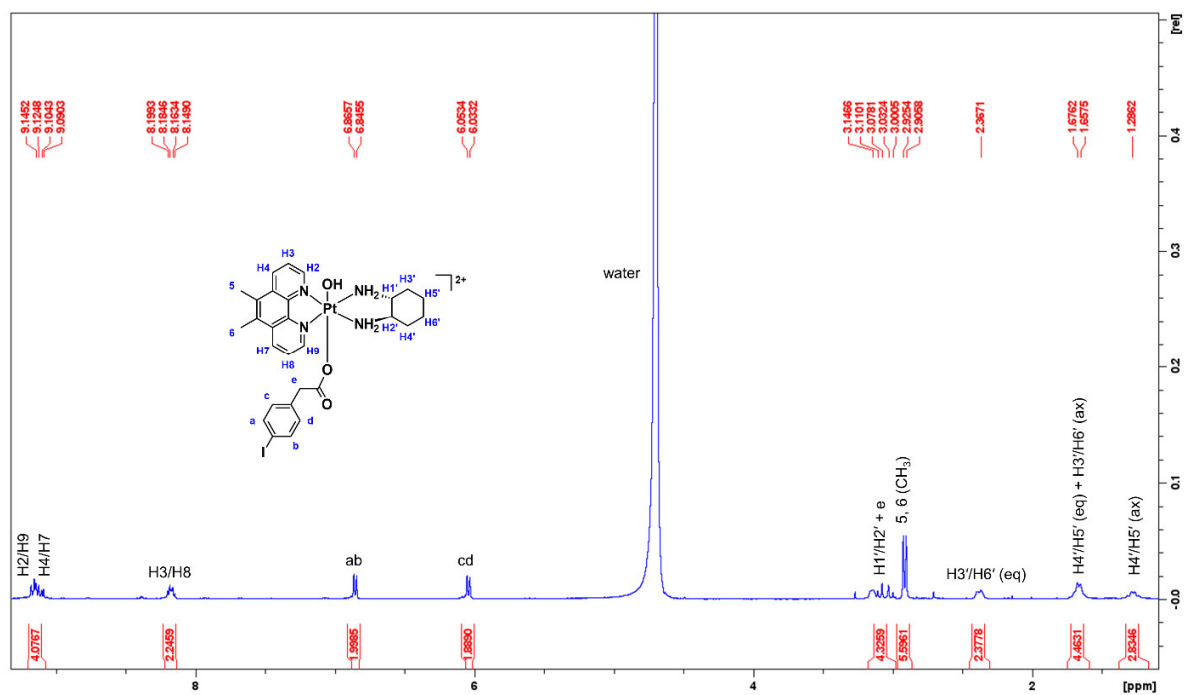

**Figure S51:** <sup>1</sup>H-NMR spectrum of **8** in D<sub>2</sub>O obtained at 298 K Inset: structure of **8** with proton labelling system.



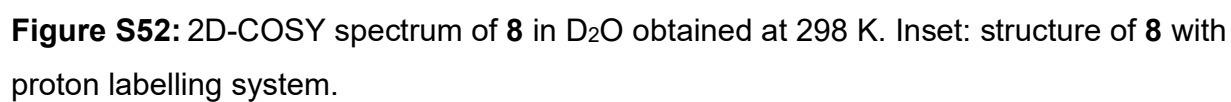

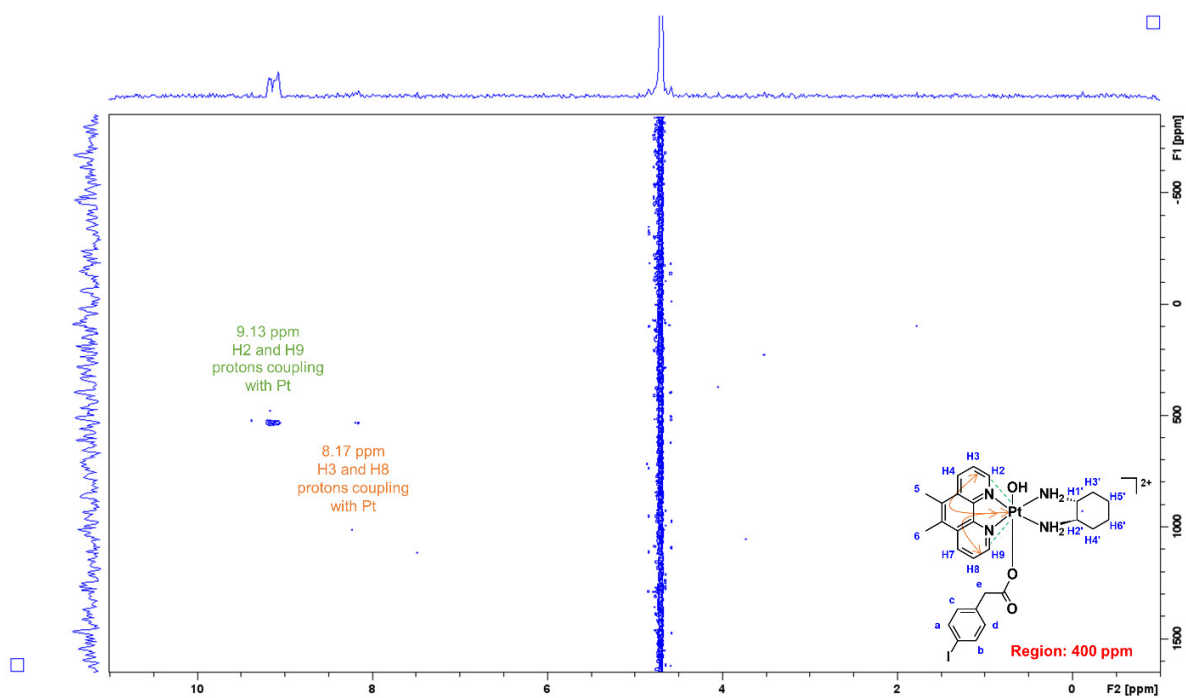

**Figure S53:**  $^1\text{H}$ - $^{195}\text{Pt}$ -HMQC spectrum of **8** in  $\text{D}_2\text{O}$  obtained at 298 K. Region: 400 ppm. Inset: structure of **8** with proton labelling system and arrows that indicate coupling.

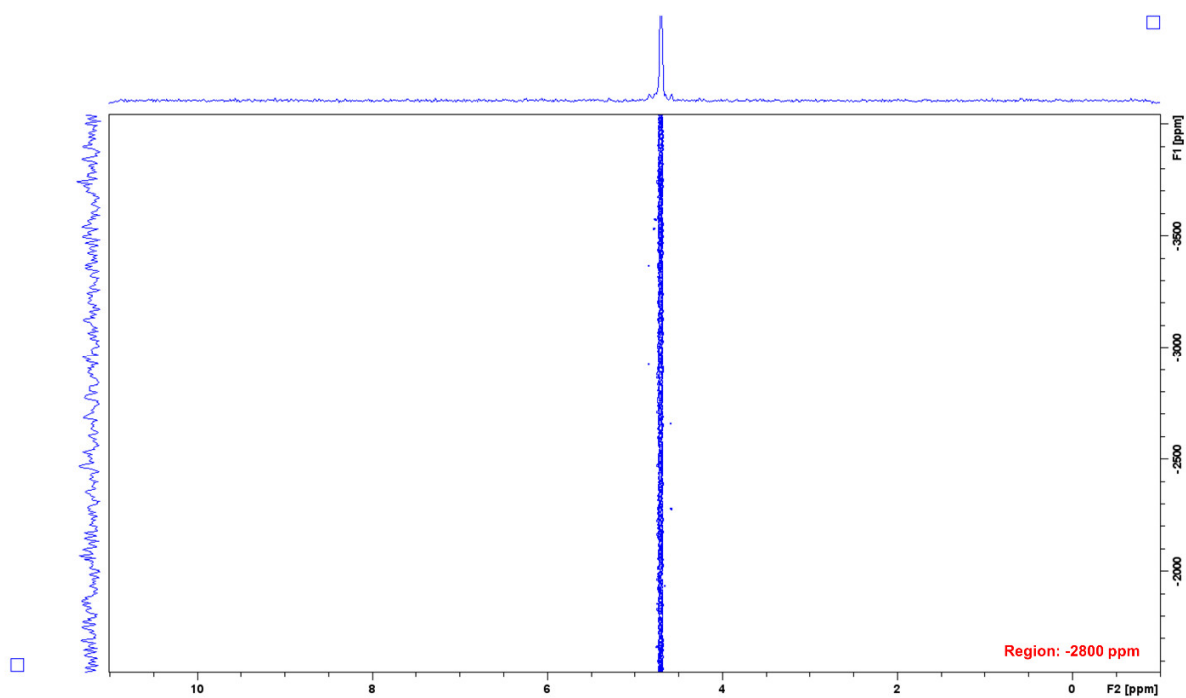

**Figure S54:**  $^1\text{H}$ - $^{195}\text{Pt}$ -HMQC spectrum of **8** in  $\text{D}_2\text{O}$  obtained at 298 K. Region: -2800 ppm. Absence of platinum(II) resonance.

### UV spectra of platinum(IV) complexes of 1 – 8

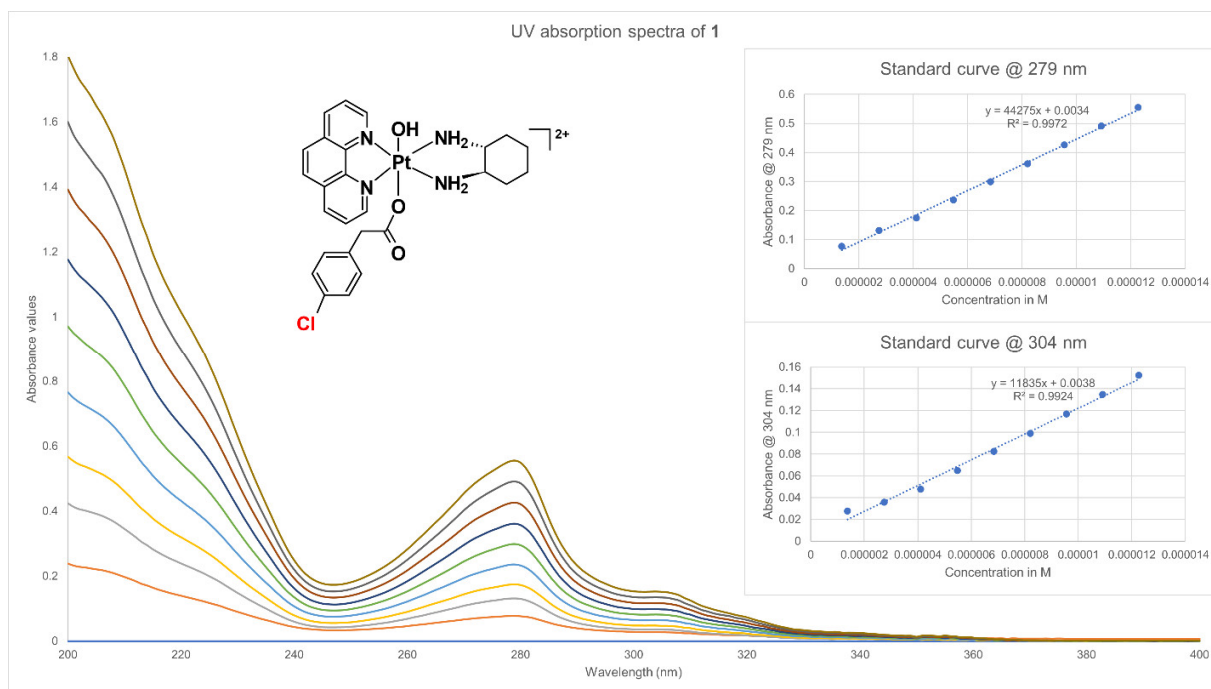

**Figure S55:** UV spectra of **1** obtained at 298 K. Inset: structure of **1** and generated plot curves within the wavelengths 279 and 304 nm.

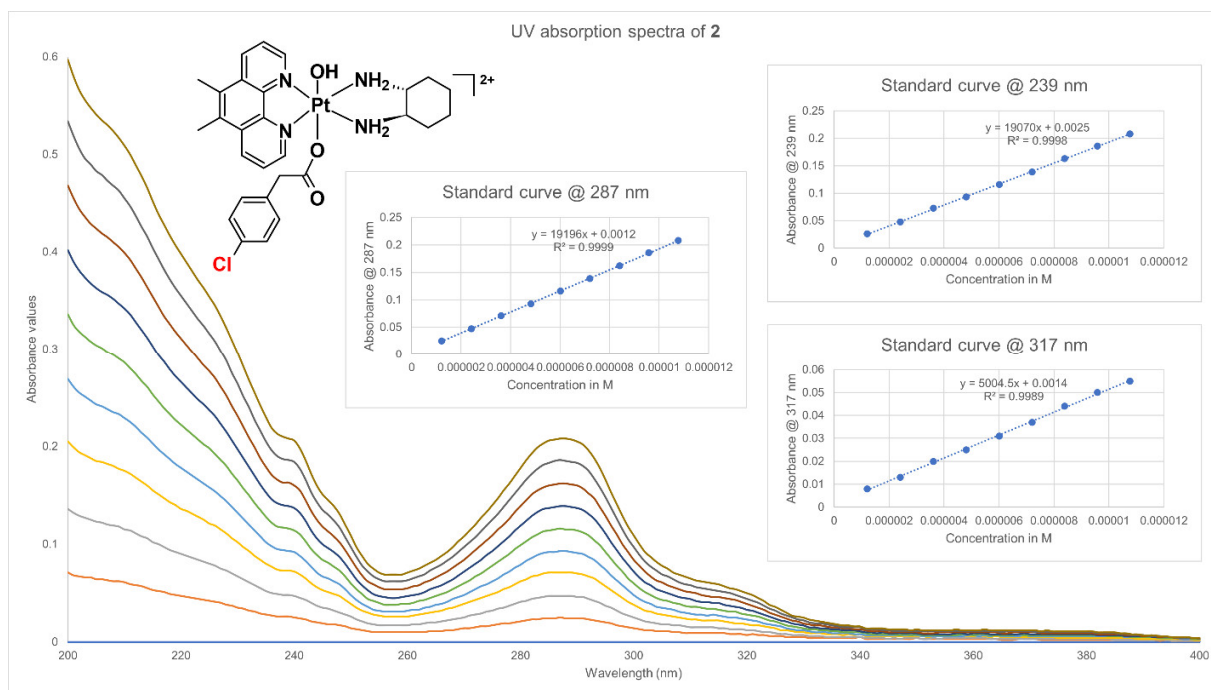

**Figure S56:** UV spectra of **2** obtained at 298 K. Inset: structure of **2** and generated plot curves within the wavelengths 239, 287 and 317 nm.

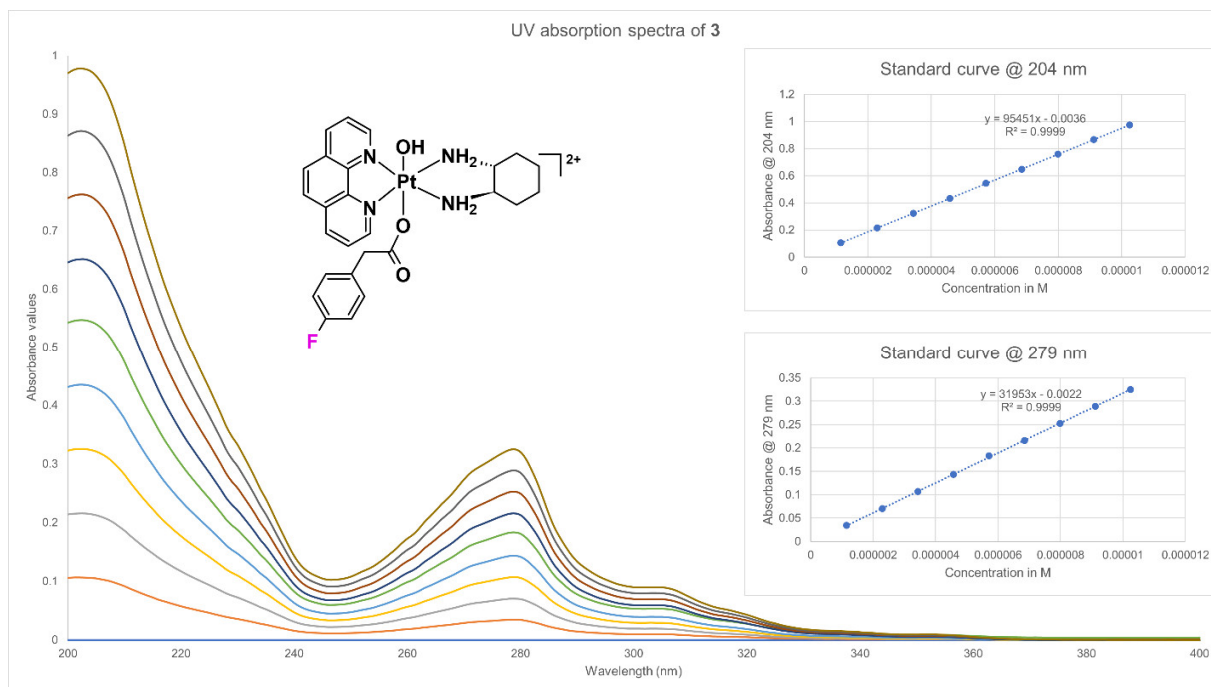

**Figure S57:** UV spectra of **3** at 298 K. Inset: structure of **3** and generated plot curves within the wavelengths 204 and 279 nm.

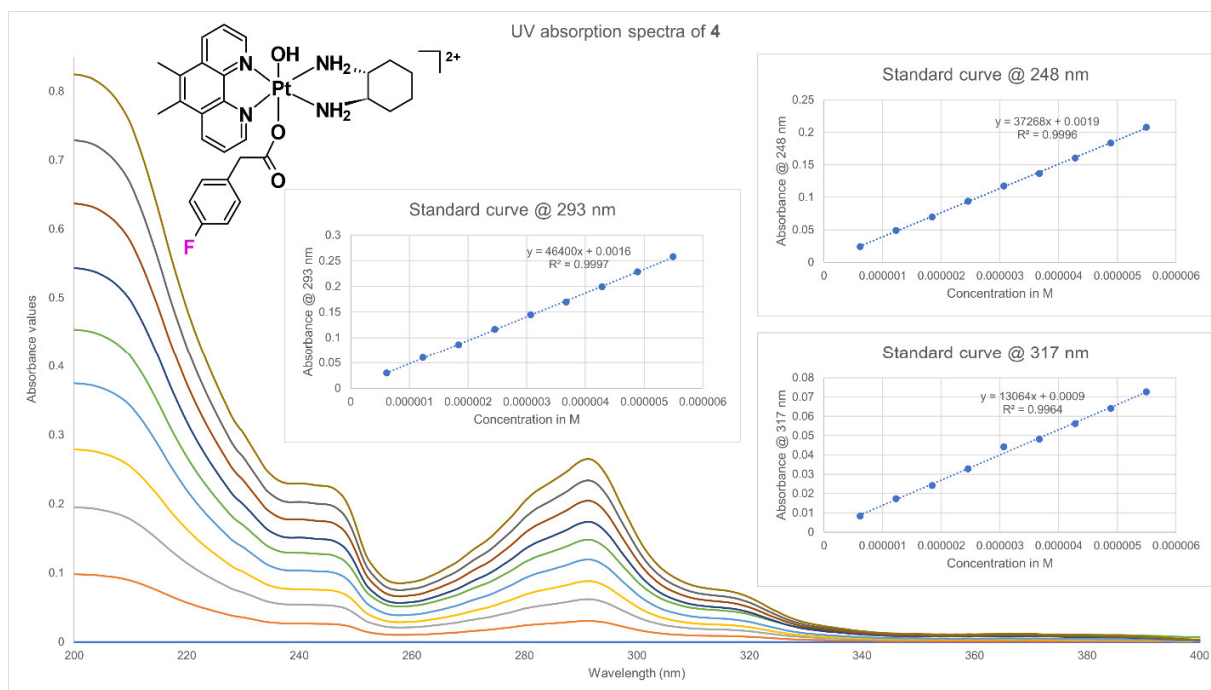

**Figure S58:** UV spectra of **4** obtained at 298 K. Inset: structure of **4** and generated plot curves within the wavelengths 248, 293 and 317 nm.

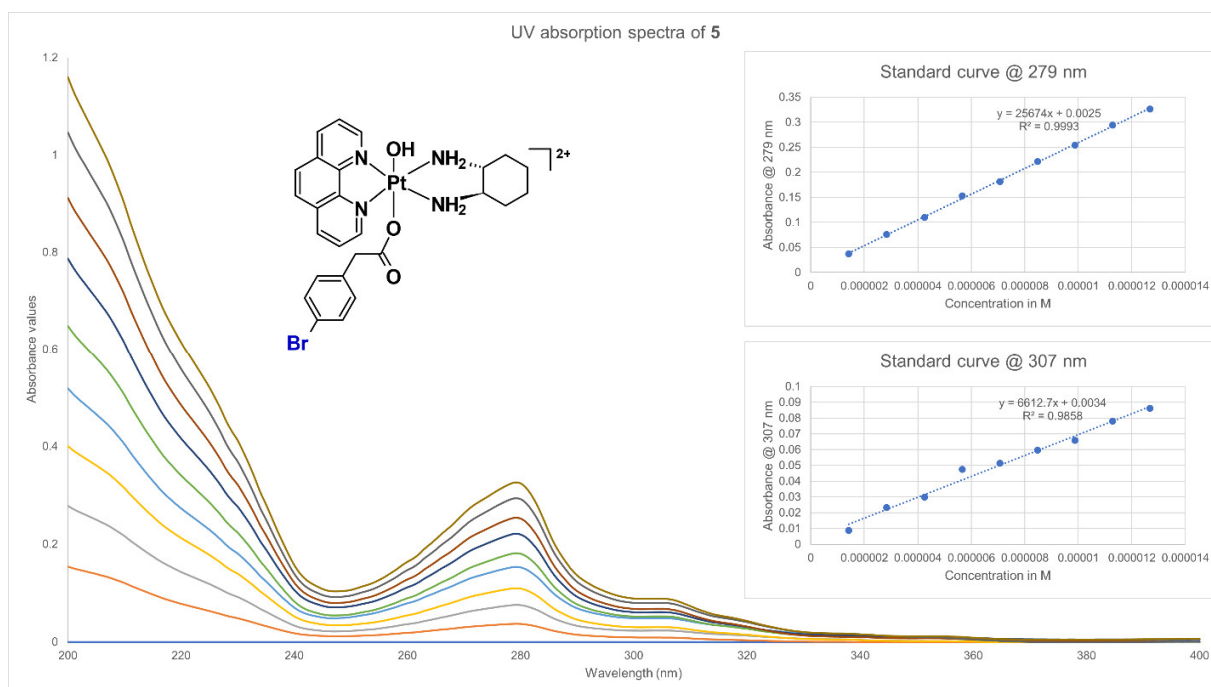

**Figure S59:** UV spectra of **5** obtained at 298 K. Inset: structure of **5** and generated plot curves within the wavelengths 279 and 307 nm.

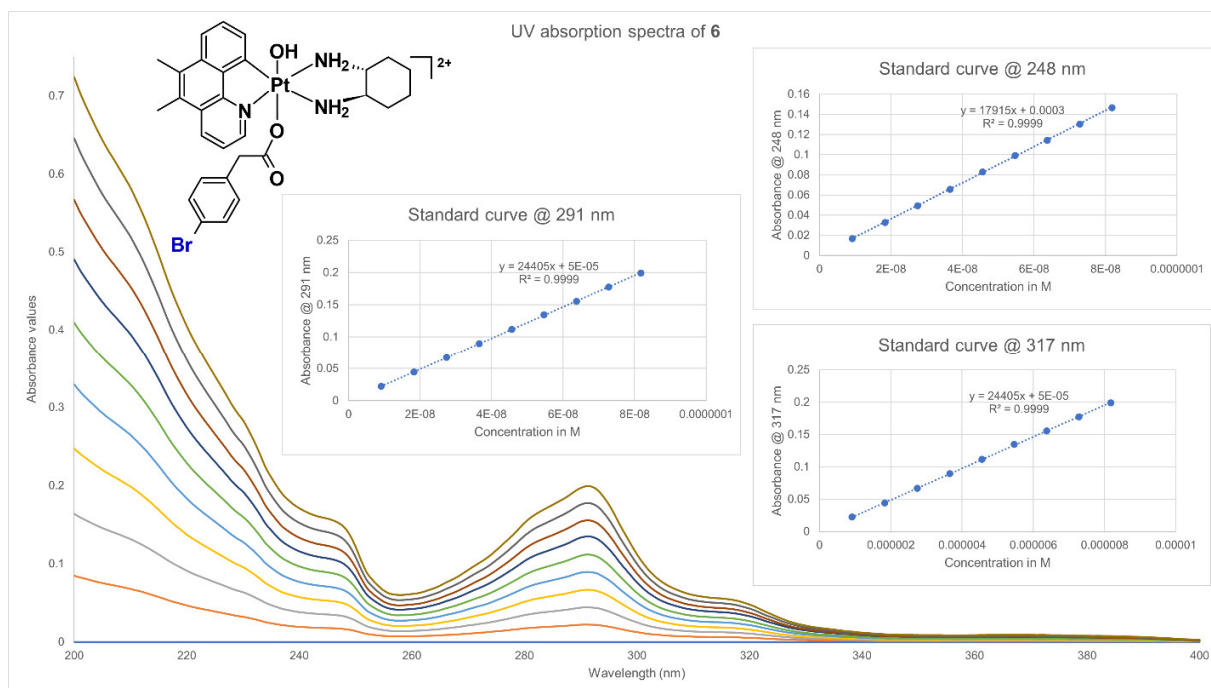

**Figure S60:** UV spectra of **6** obtained at 298 K. Inset: structure of **6** and generated plot curves within the wavelengths 248, 291 and 317 nm.

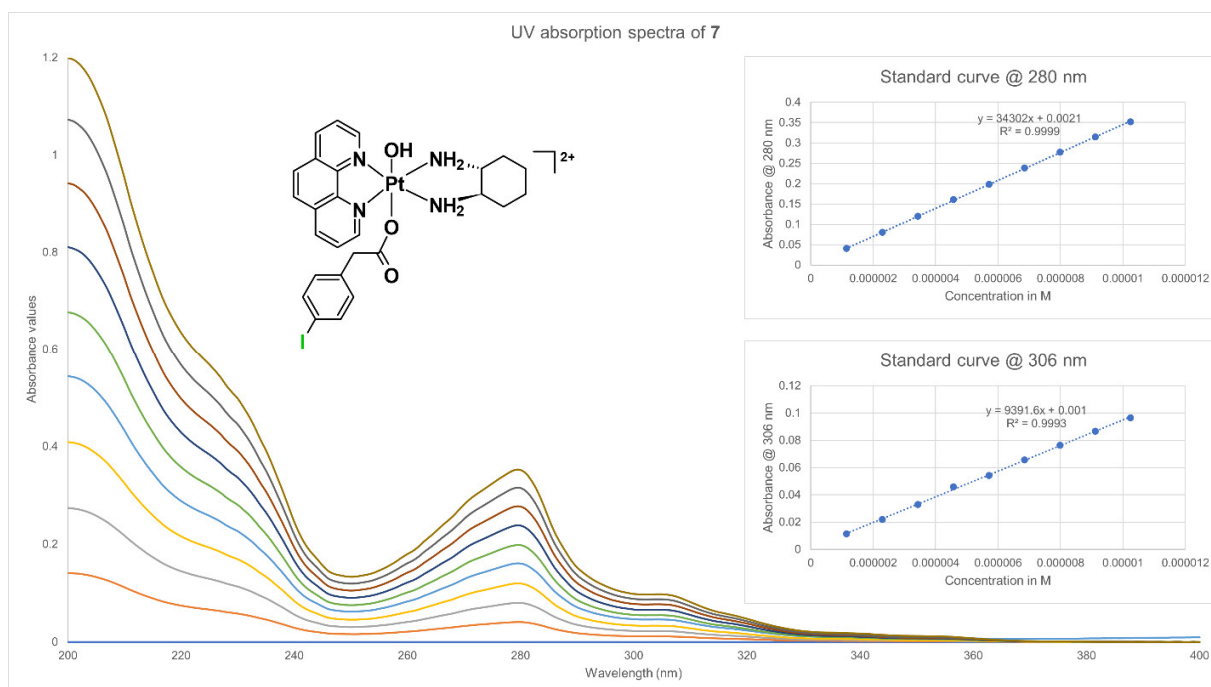

**Figure S61:** UV spectra of **7** obtained at 298 K. Inset: structure of **7** and generated plot curves within the wavelengths 280 and 306 nm.

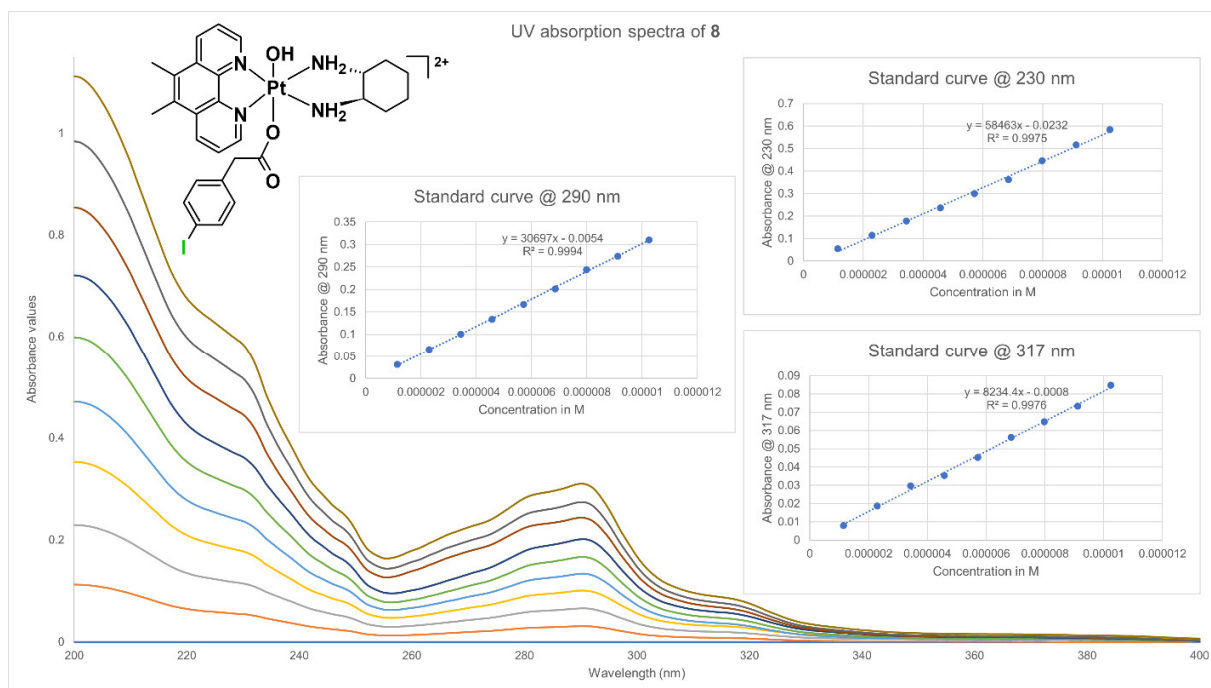

**Figure S62:** UV spectra of **8** obtained at 298 K. Inset: structure of **8** and generated plot curves within the wavelengths 230, 290 and 317 nm.



### CD spectra of 1 – 8

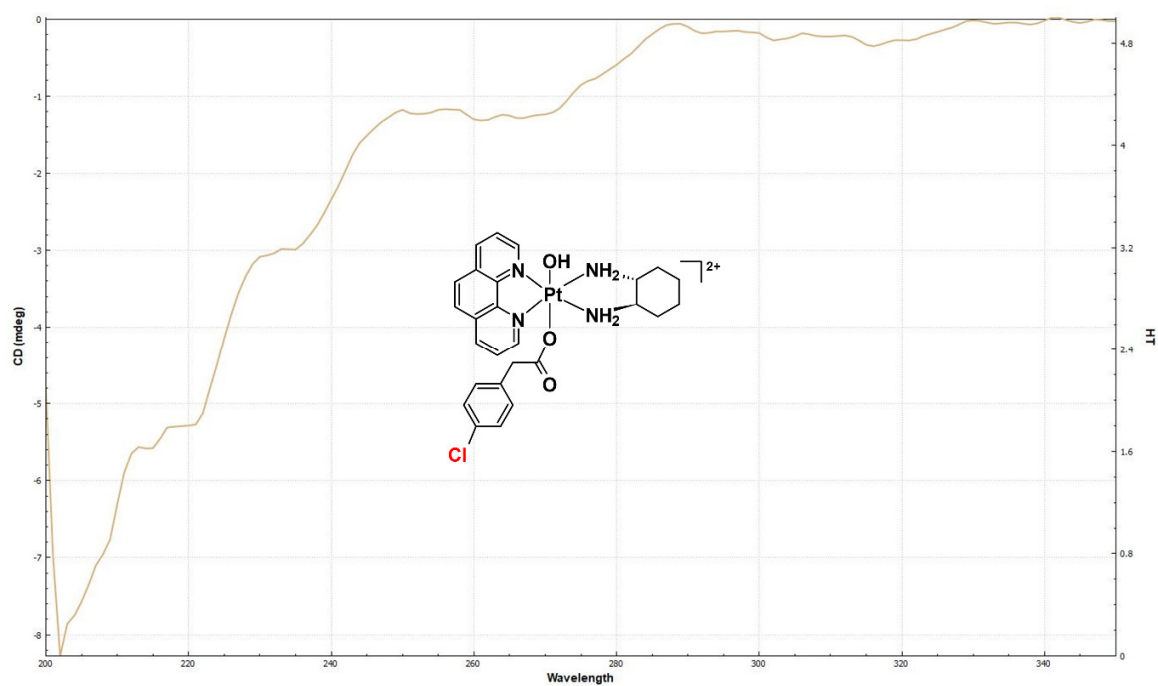

**Figure S63:** CD spectrum of **1** obtained at 298 K. Inset: structure of **1**.

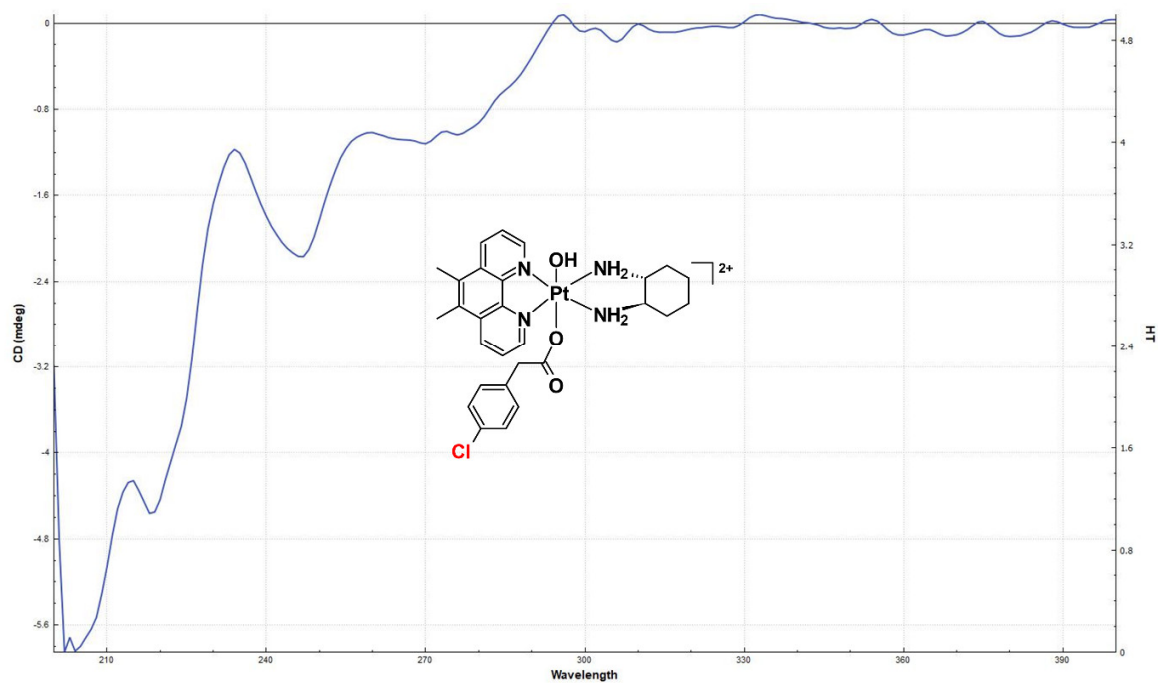

**Figure S64:** CD spectrum of **2** obtained at 298 K. Inset: structure of **2**.

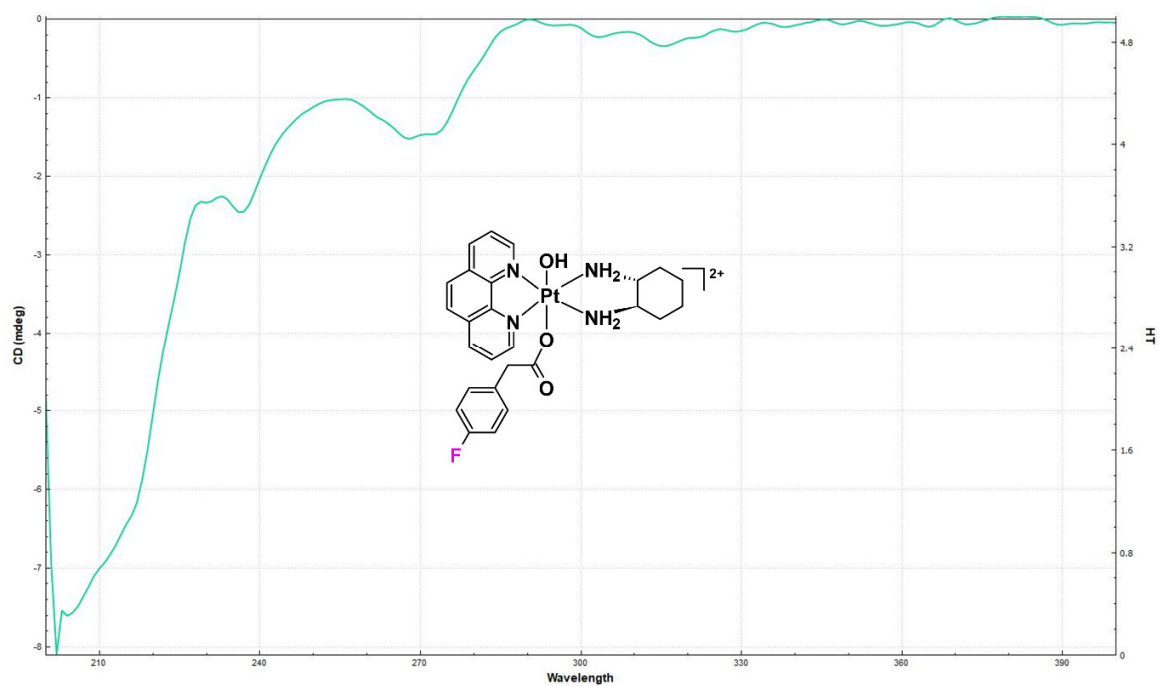

**Figure S65:** CD spectrum of **3** obtained at 298 K. Inset: structure of **3**.

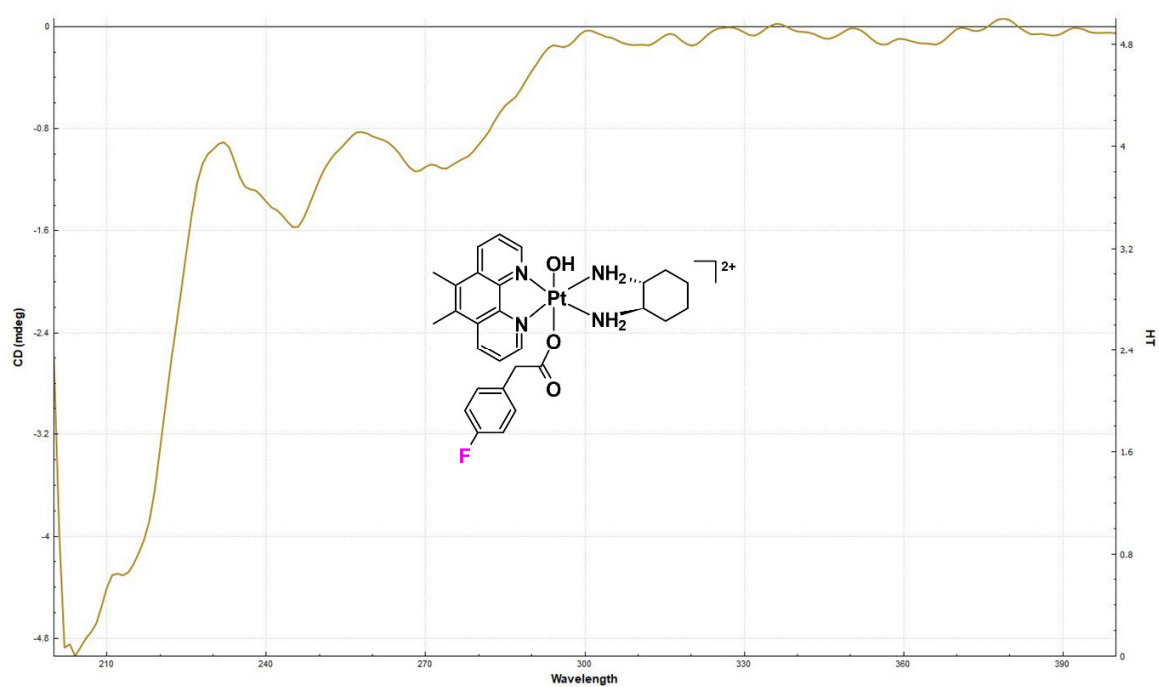

**Figure S66:** CD spectrum of **4** obtained at 298 K. Inset: structure of **4**.

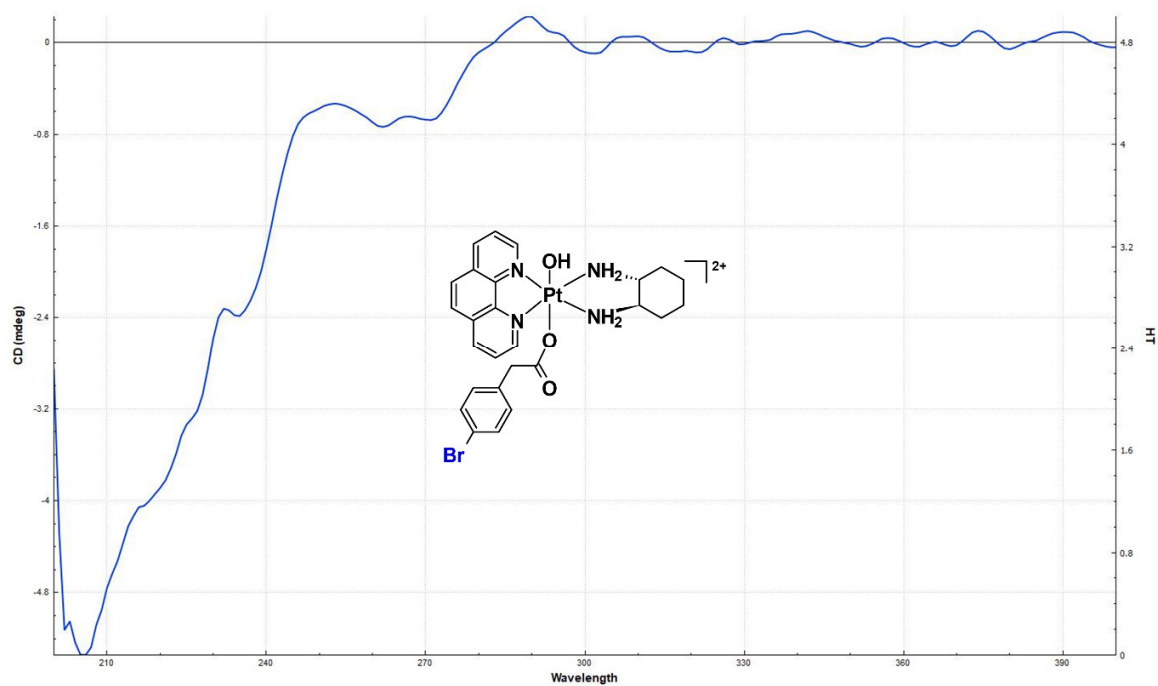

**Figure S67:** CD spectrum of **5** obtained at 298 K. Inset: structure of **5**.

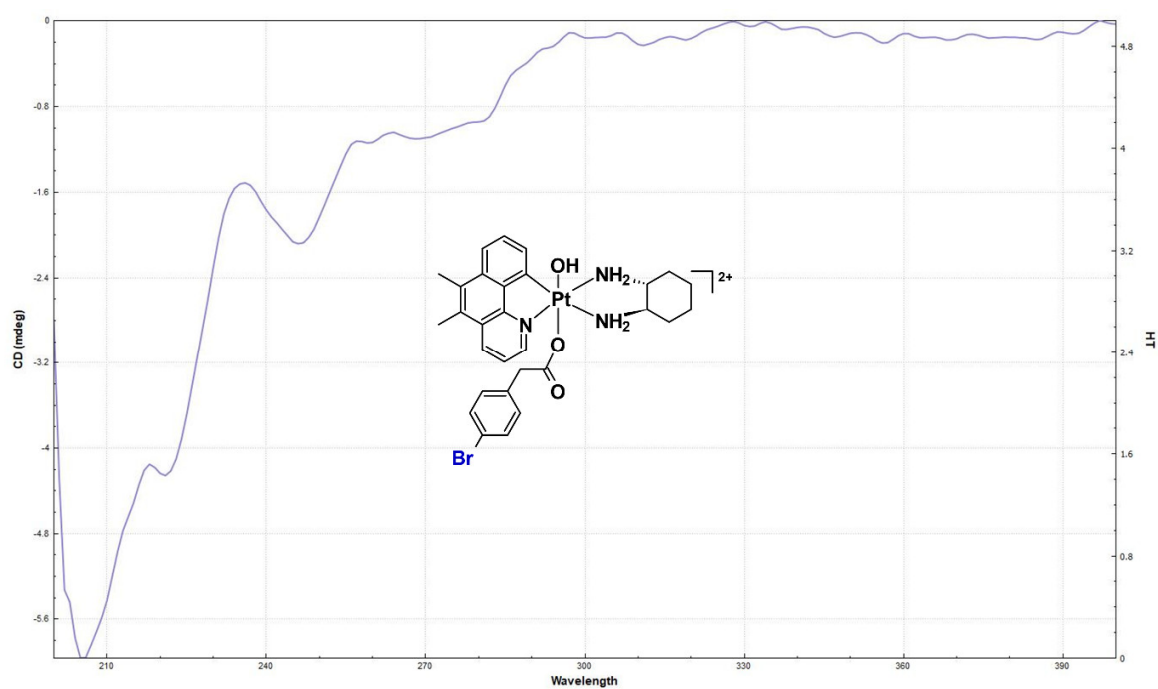

**Figure S68:** CD spectrum of **6** obtained at 298 K. Inset: structure of **6**.

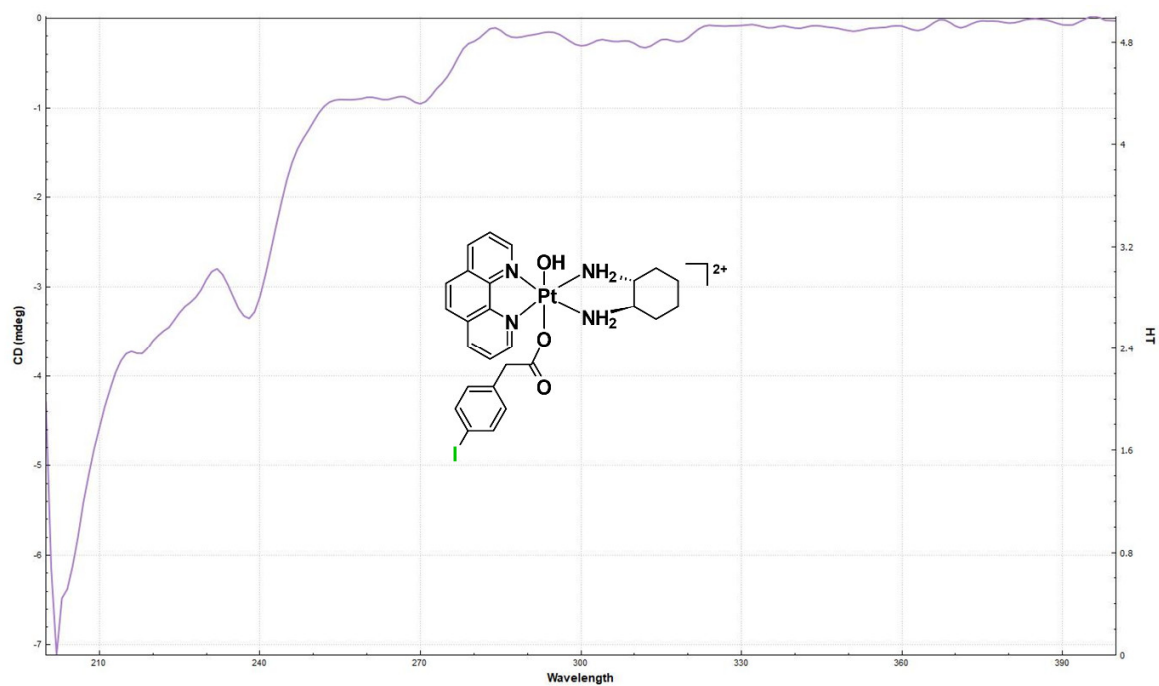

**Figure S69:** CD spectrum of **7** obtained at 298 K. Inset: structure of **7**.

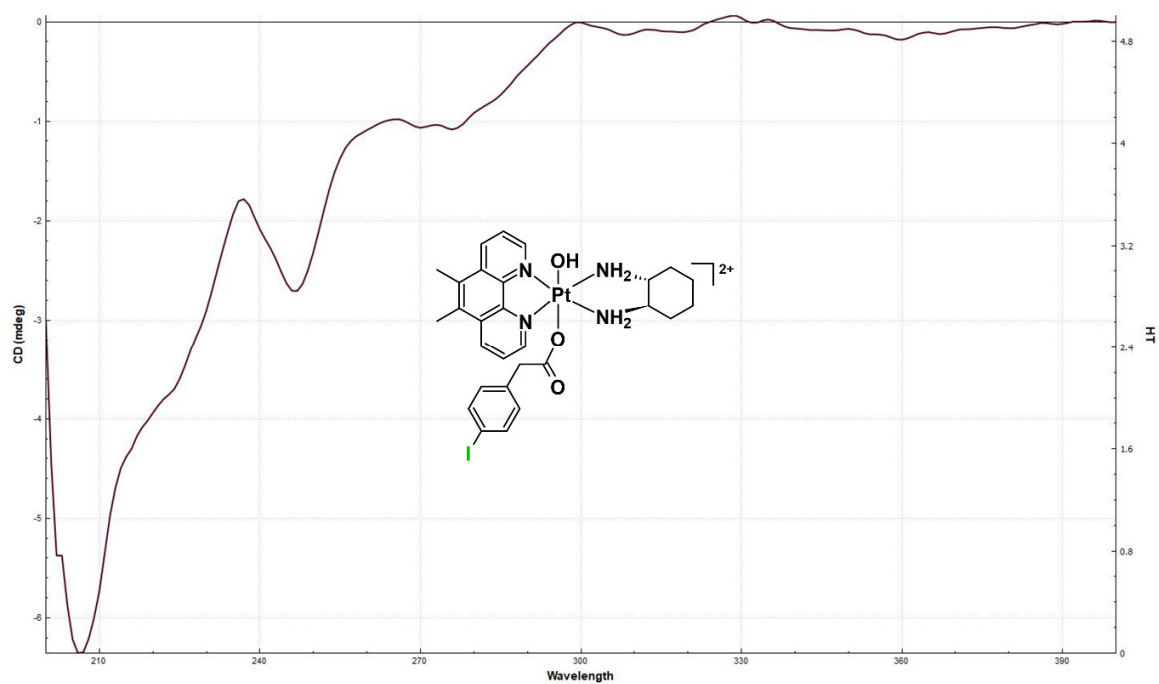

**Figure S70:** CD spectrum of **8** obtained at 298 K. Inset: structure of **8**.

## ESI-MS spectra of 1 – 8

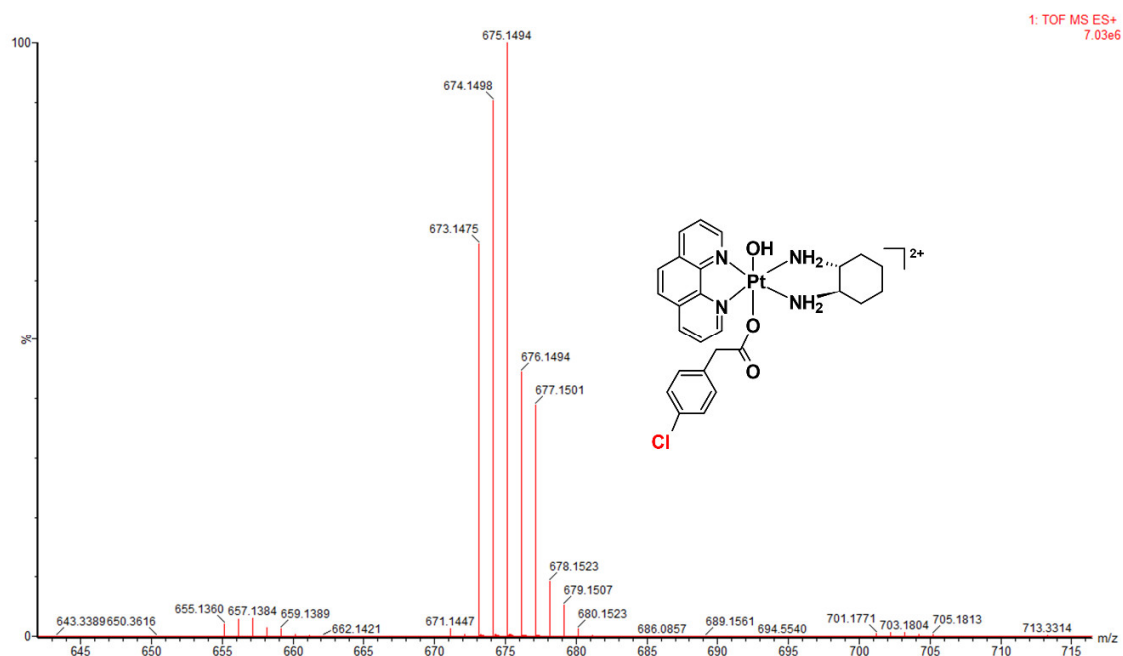

**Figure S71:** ESI-MS spectrum of **1** obtained at 298 K, using a Waters SYNAPT G2-Si quadrupole time-of-flight (QTOF) HDMS. Inset: structure of **1**.

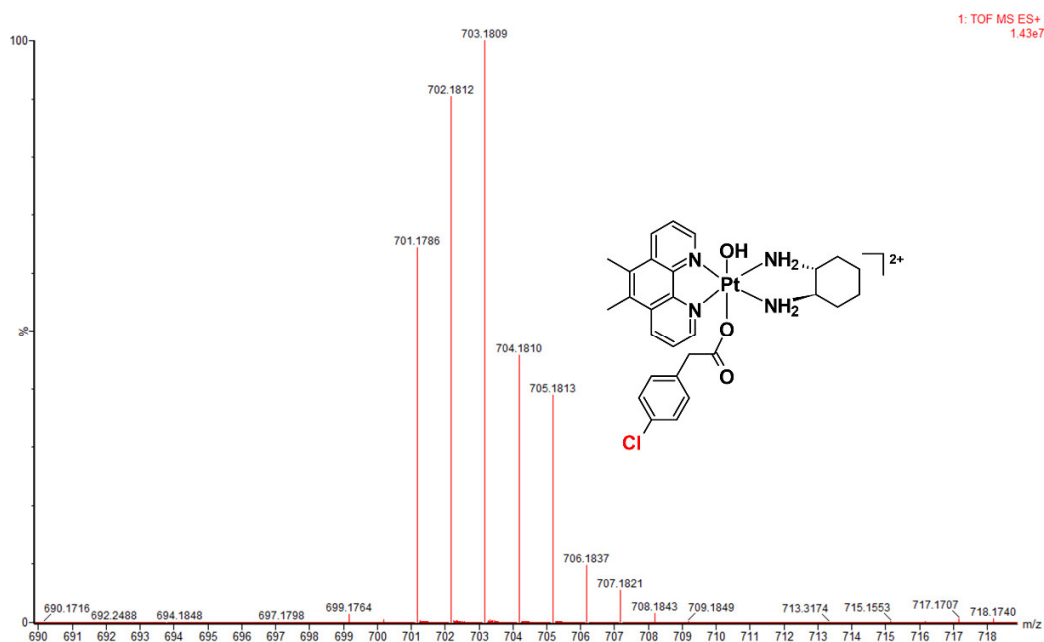

**Figure S72:** ESI-MS spectrum of **2** obtained at 298 K, using a Waters SYNAPT G2-Si quadrupole time-of-flight (QTOF) HDMS. Inset: structure of **2**.

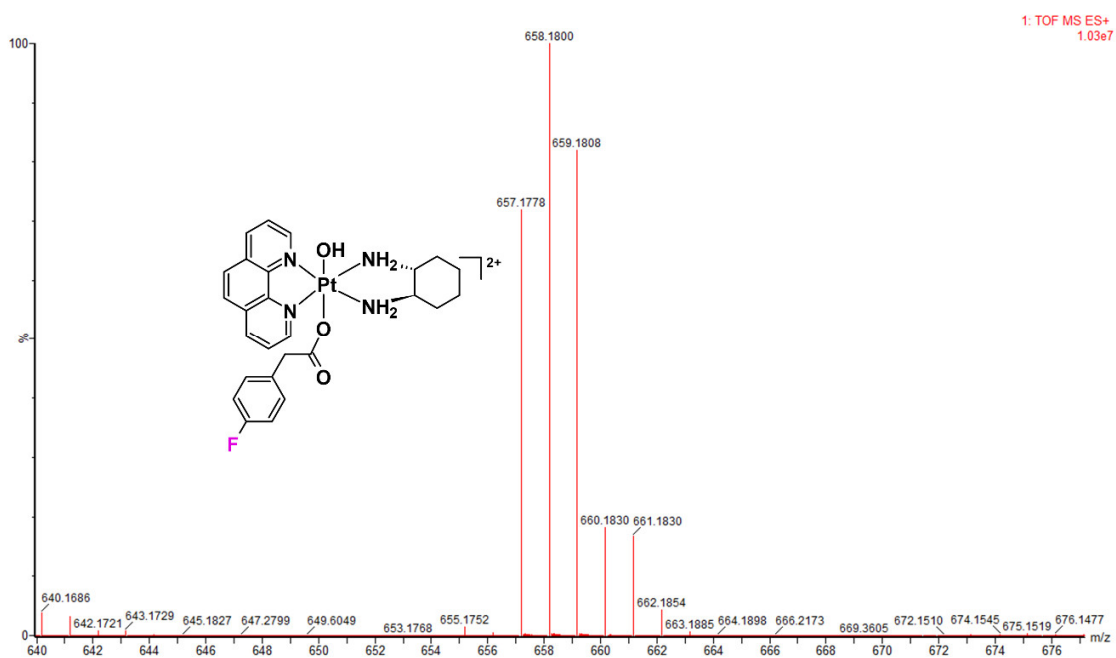

**Figure S73:** ESI-MS spectrum of **3** obtained at 298 K, using a Waters SYNAPT G2-Si quadrupole time-of-flight (QTOF) HDMS. Inset: structure of **3**.

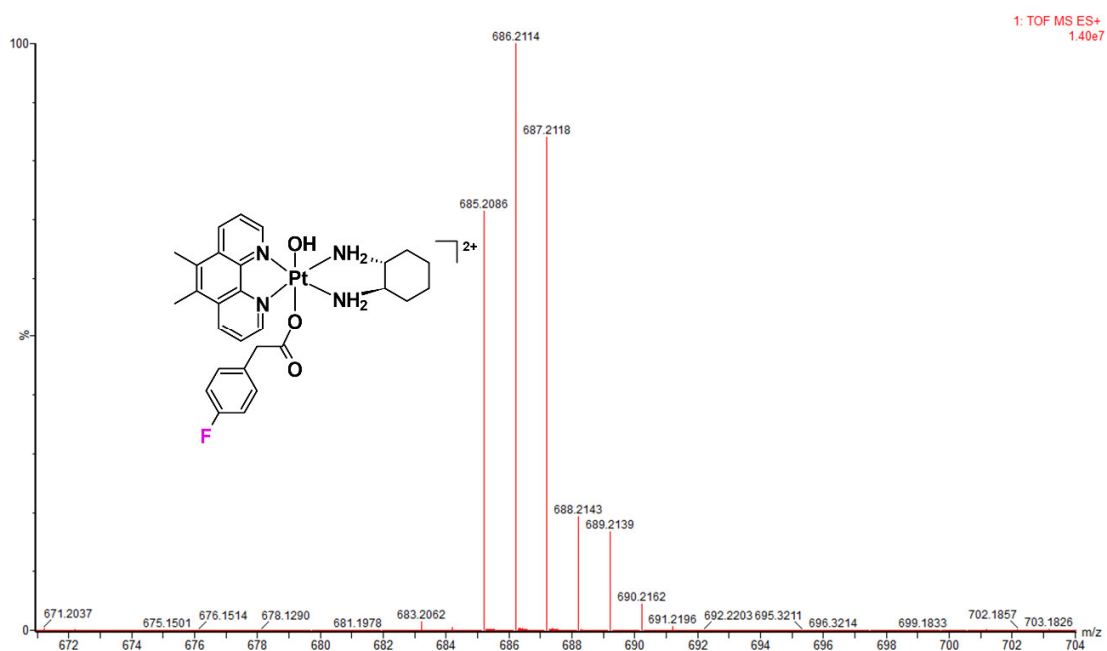

**Figure S74:** ESI-MS spectrum of **4** obtained at 298 K, using a Waters SYNAPT G2-Si quadrupole time-of-flight (QTOF) HDMS. Inset: structure of **4**.



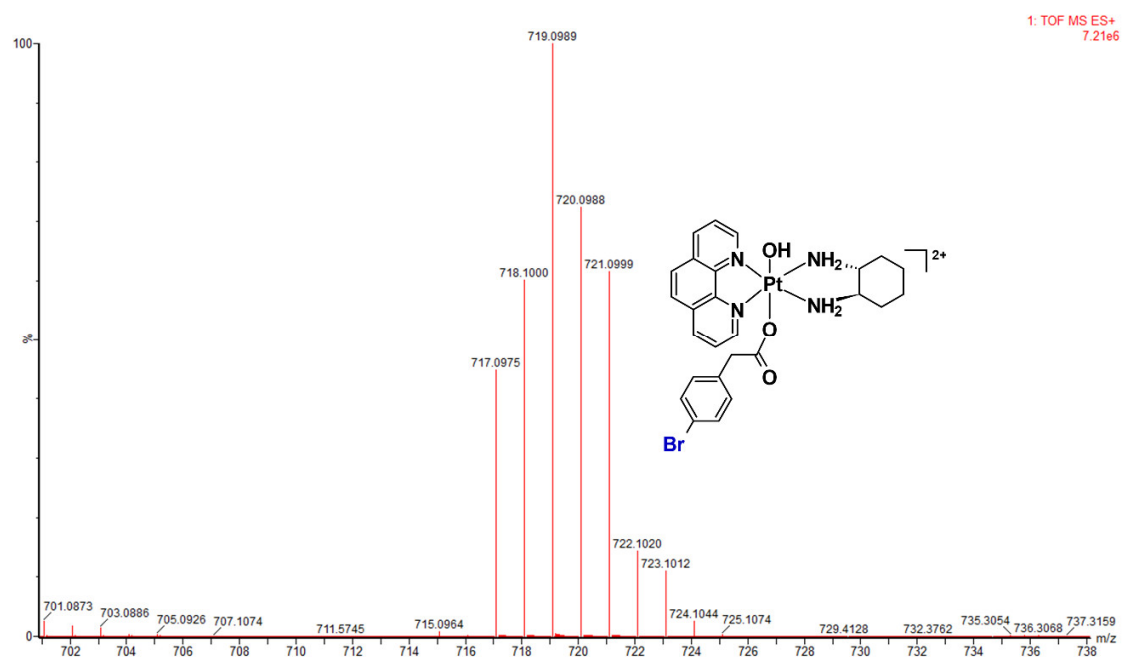

**Figure S75:** ESI-MS spectrum of **5** obtained at 298 K, using a Waters SYNAPT G2-Si quadrupole time-of-flight (QTOF) HDMS. Inset: structure of **5**.

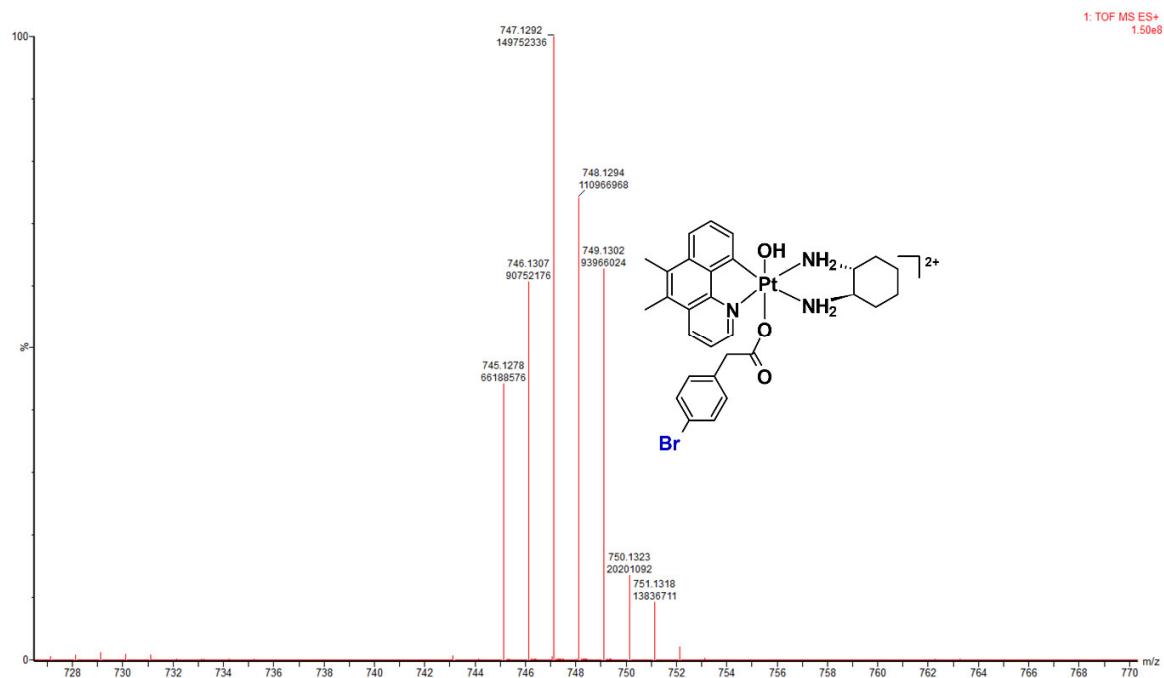

**Figure S76:** ESI-MS spectrum of **6** obtained at 298 K, using a Waters SYNAPT G2-Si quadrupole time-of-flight (QTOF) HDMS. Inset: structure of **6**.

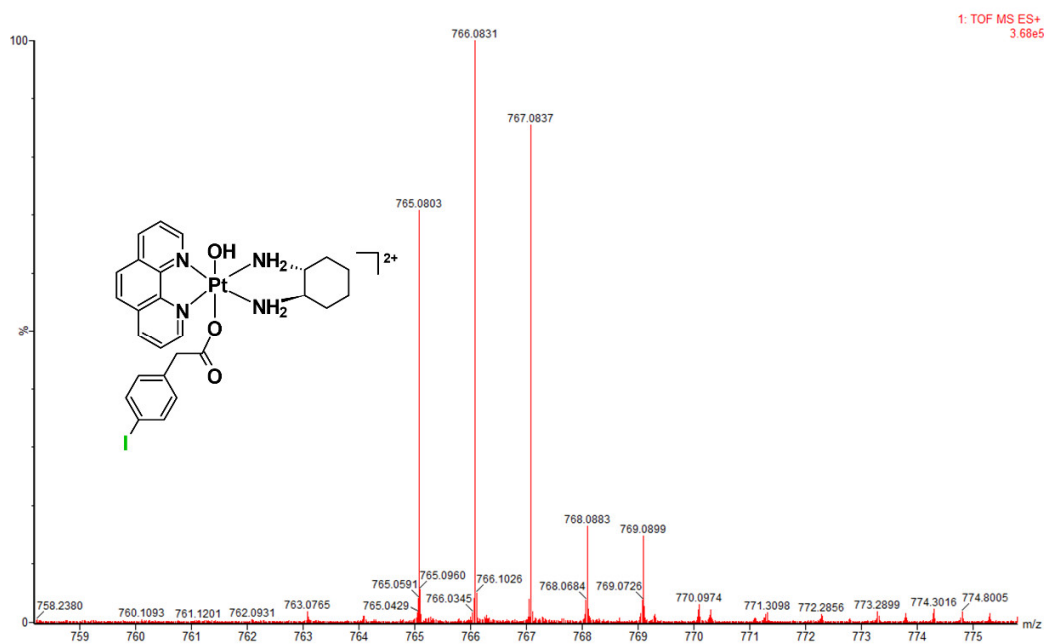

**Figure S77:** ESI-MS spectrum of **7** obtained at 298 K, using a Waters SYNAPT G2-Si quadrupole time-of-flight (QTOF) HDMS. Inset: structure of **7**.

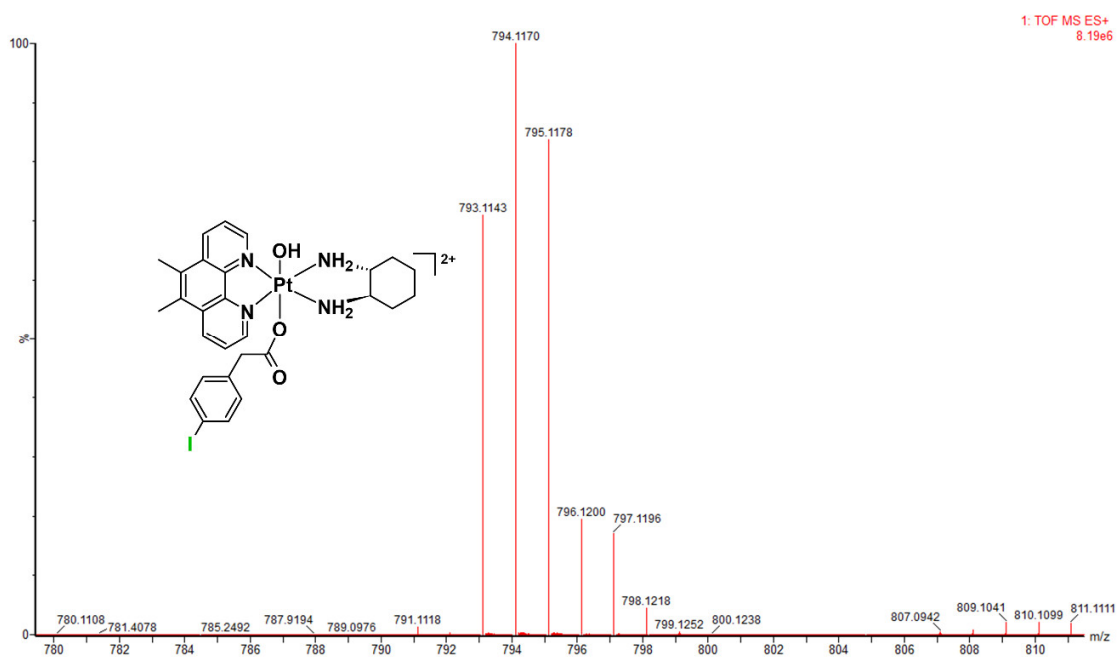

**Figure S78:** ESI-MS spectrum of **8** obtained at 298 K, using a Waters SYNAPT G2-Si quadrupole time-of-flight (QTOF) HDMS. Inset: structure of **8**.

## Stability studies

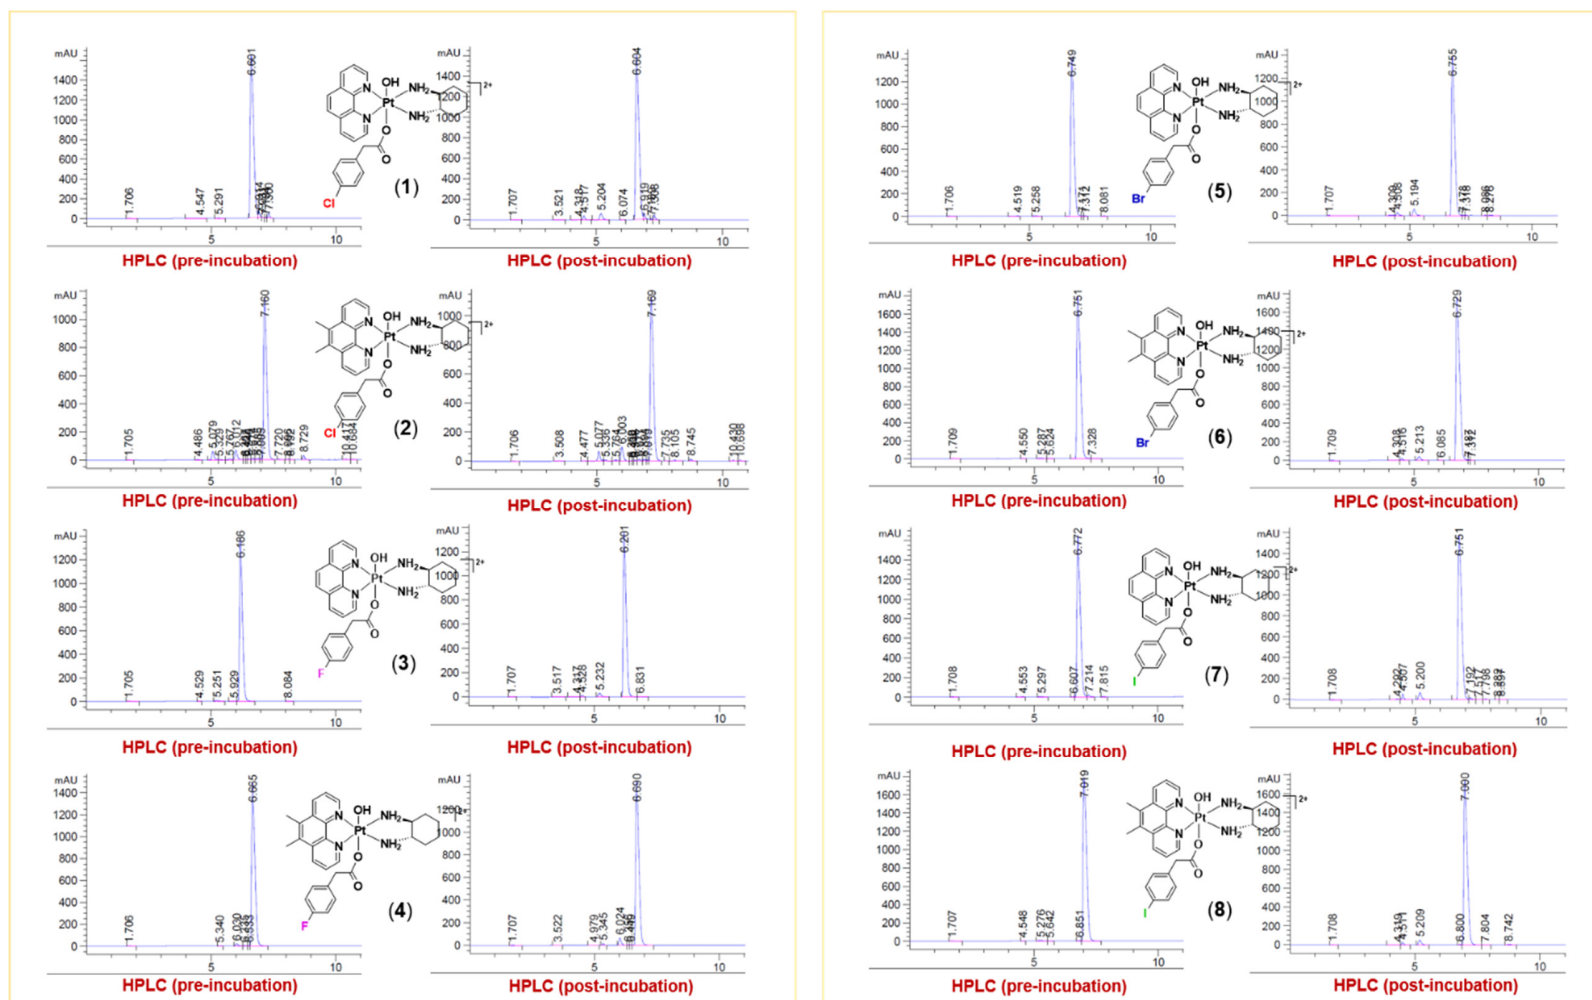

**Figure S79:** HPLC chromatograms of 1–8 in 10 mM PBS (~7.4 pH) PBS pre- and post-incubation (36 h) obtained at 298 K. Inset: structures of 1–8.

## Lipophilicity measurements

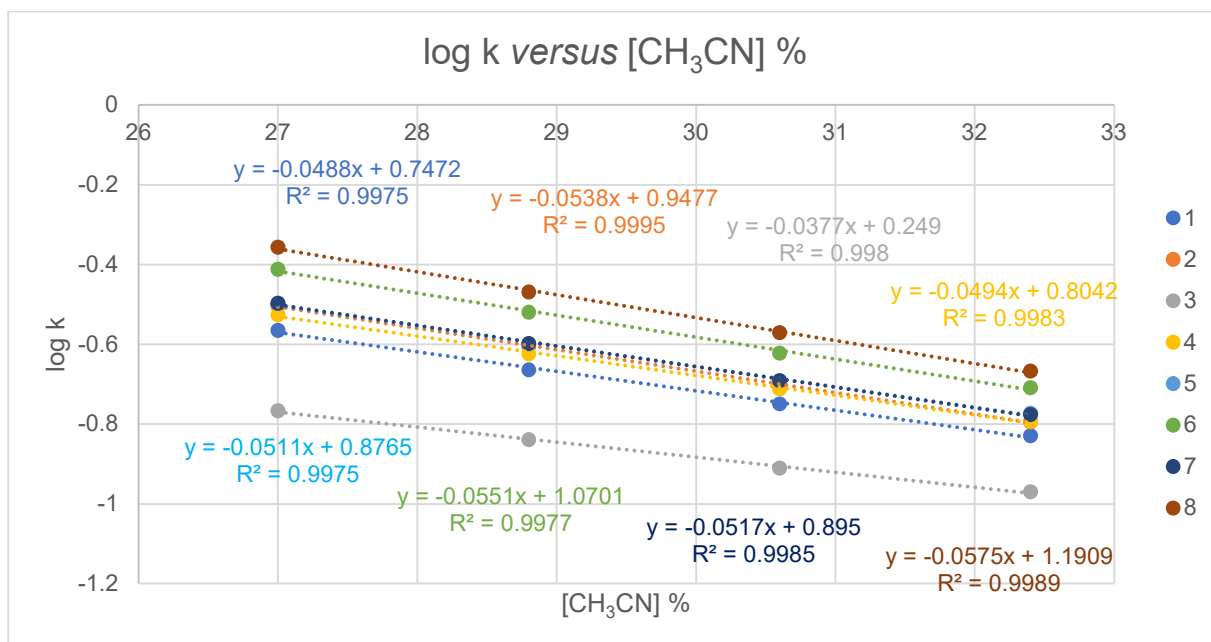

**Figure S80:** Generated plot curves of log k versus concentration of organic solvent, CH<sub>3</sub>CN to determine the chromatographic lipophilicity index, log *k*<sub>w</sub> of **1–8**.

## Reduction reaction experiments

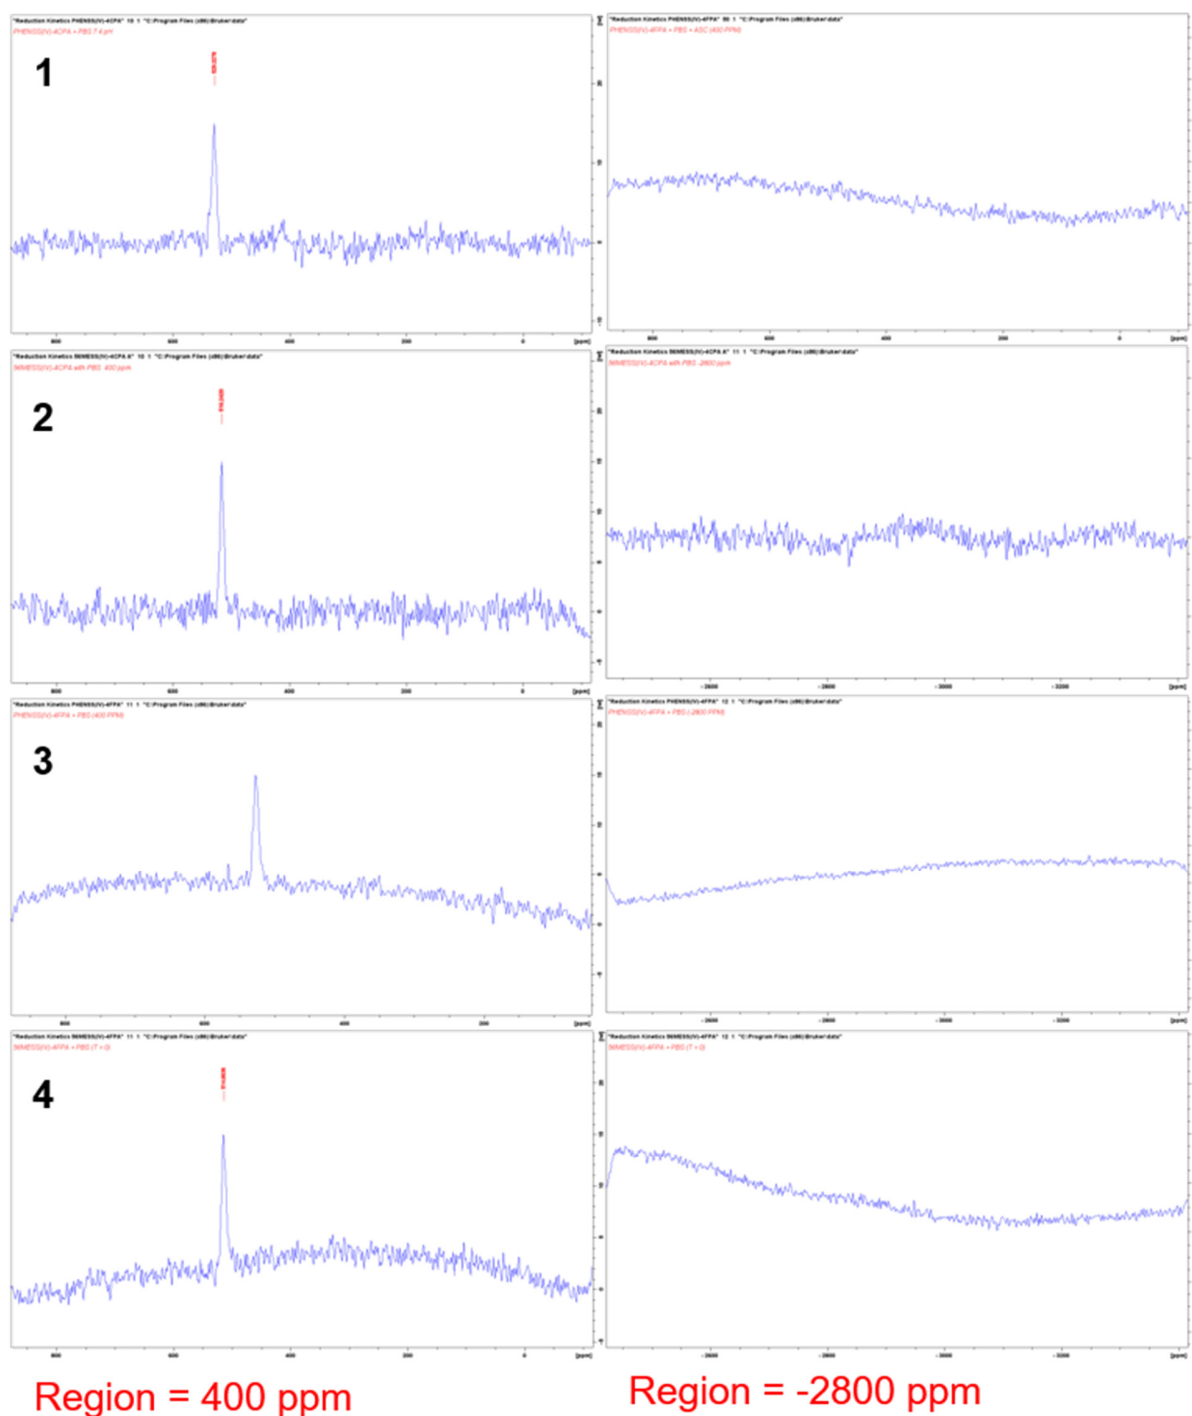

**Figure S81:** Preliminary 1D- $^{195}\text{Pt}$ -NMR spectra of **1**, **2**, **3** and **4** in 10 mM PBS (~7.4 pH) within the regions of -2800 and 400 ppm at 37 °C.

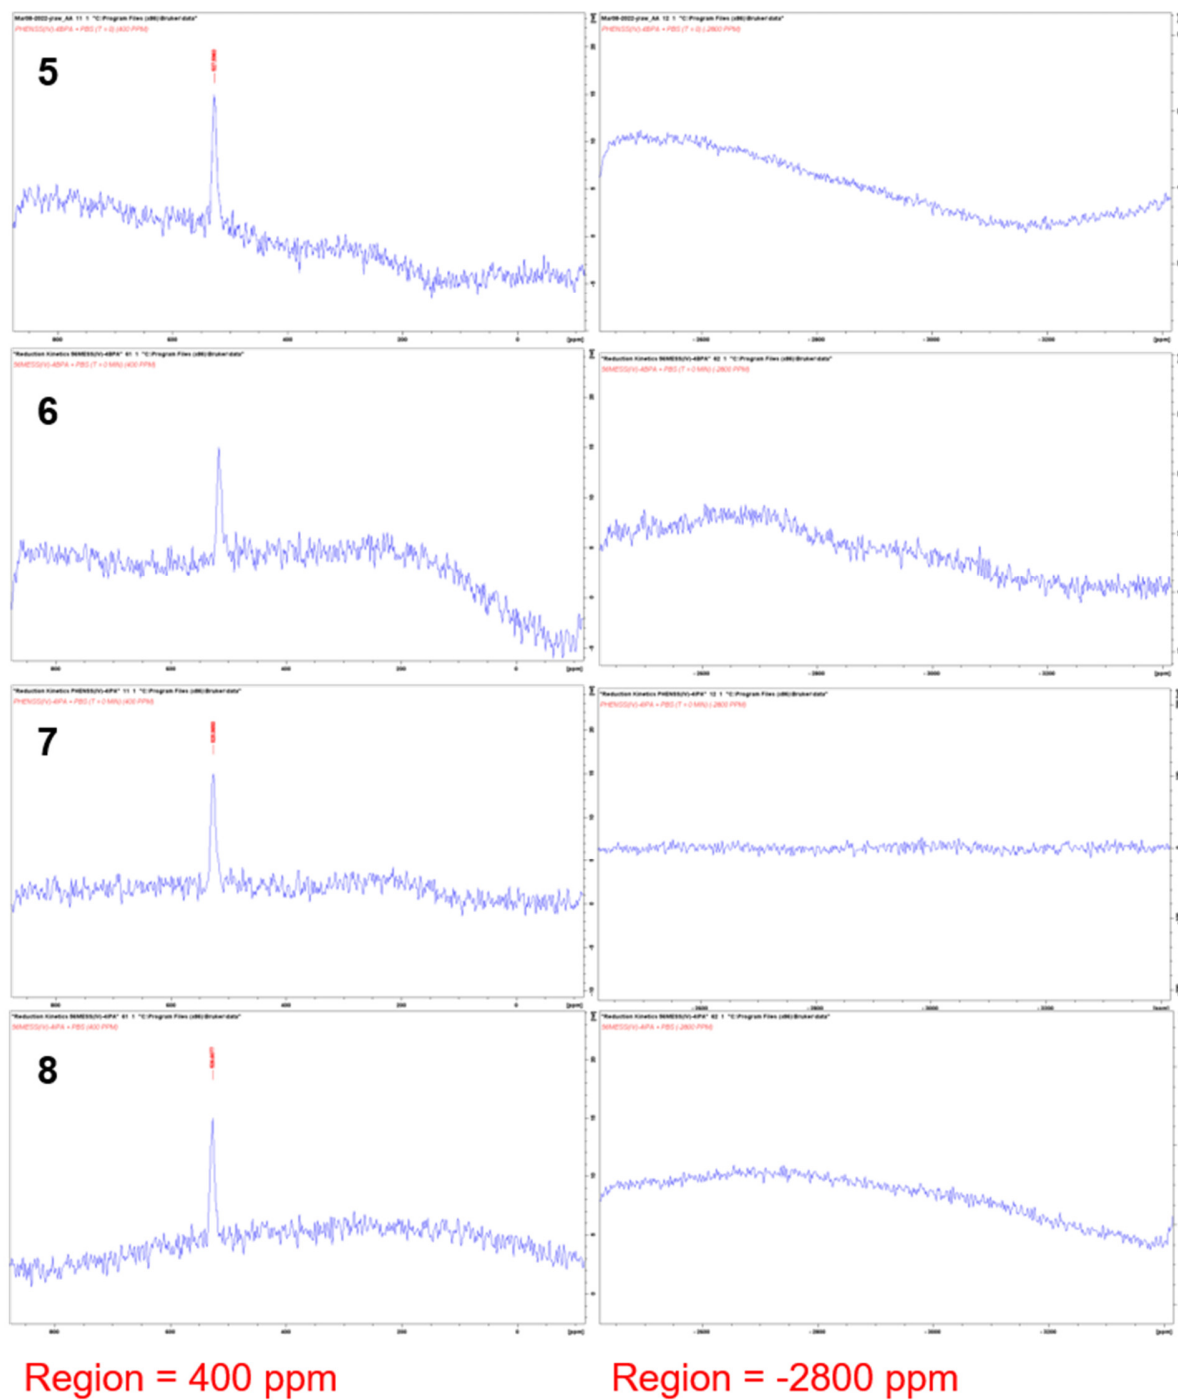

**Figure S82:** Preliminary 1D- $^{195}\text{Pt}$ -NMR spectra of **5**, **6**, **7** and **8** in 10 mM PBS (~7.4 pH) within the regions of -2800 and 400 ppm at 37 °C.



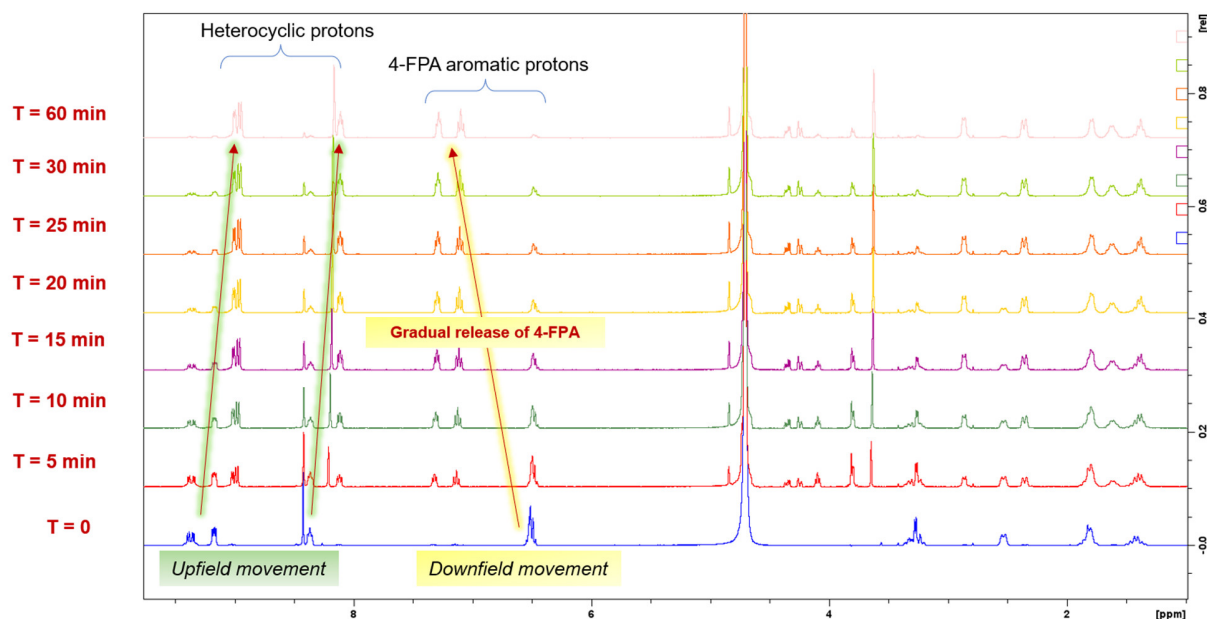

**Figure S83:**  $^1\text{H}$ -NMR spectra of **3** with 10 mM PBS ( $\sim 7.4$  pH) and AsA in  $\text{D}_2\text{O}$  at 310.15 K, in different time intervals, highlighting the movement of resonances from the phenanthroline protons and the aromatic protons of the 4-FPA ligand as indicated by the red arrows. **T** represents time in min.

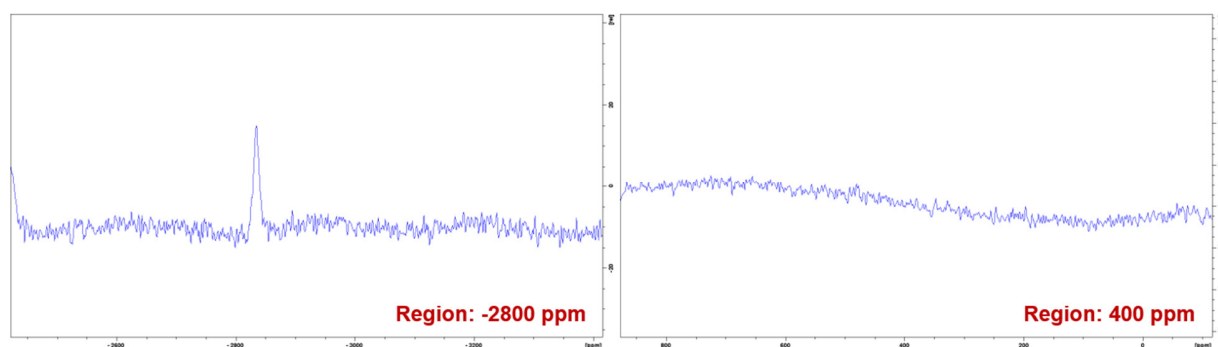

**Figure S84:** 1D- $^{195}\text{Pt}$ -NMR spectra of **3** with 10 mM PBS ( $\sim 7.4$  pH) and AsA in  $\text{D}_2\text{O}$ , within the regions of -2800 and 400 ppm at 310.15 K, highlighting its complete reduction after 1 h from the final  $^1\text{H}$ -NMR experiment.

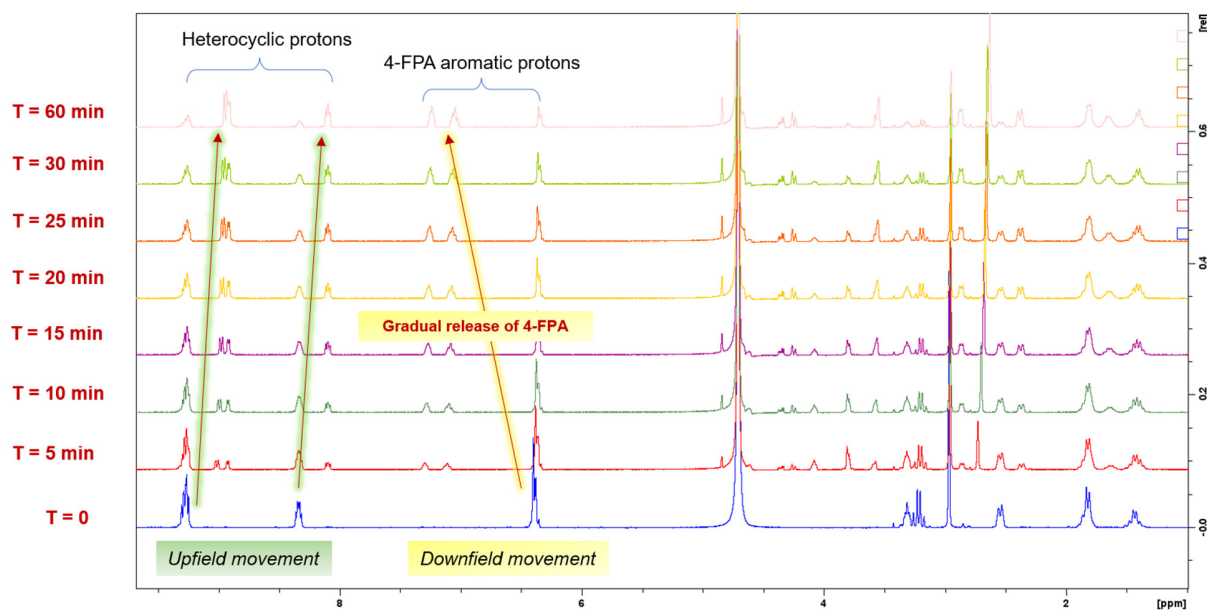

**Figure S85:**  $^1\text{H}$ -NMR spectra of **4** with 10 mM PBS ( $\sim 7.4$  pH) and AsA in  $\text{D}_2\text{O}$  at 310.15 K, in different time intervals, highlighting the movement of resonances from the phenanthroline protons and the aromatic protons of the 4-FPA ligand as indicated by the red arrows. **T** represents time in min.

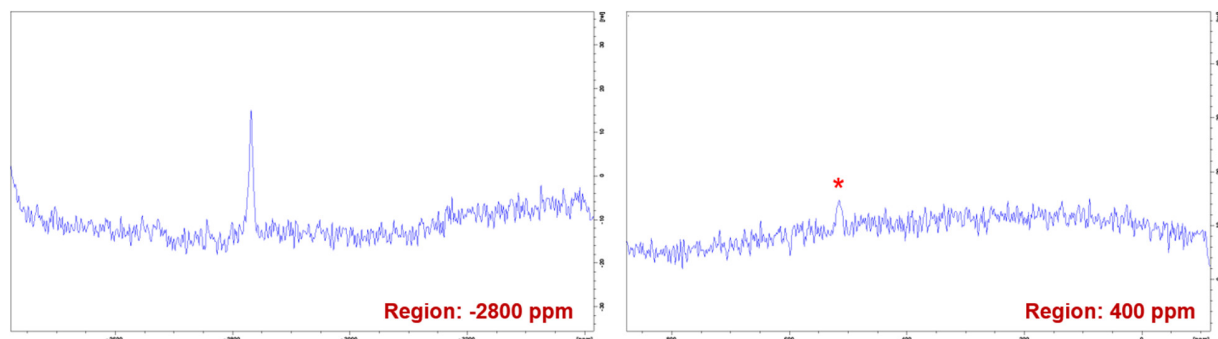

**Figure S86:** 1D- $^{195}\text{Pt}$ -NMR spectra of **4** with 10 mM PBS ( $\sim 7.4$  pH) and AsA in  $\text{D}_2\text{O}$ , within the regions of -2800 and 400 ppm at 310.15 K, highlighting its partial reduction after 1 h from the final  $^1\text{H}$ -NMR experiment as indicated by \*.

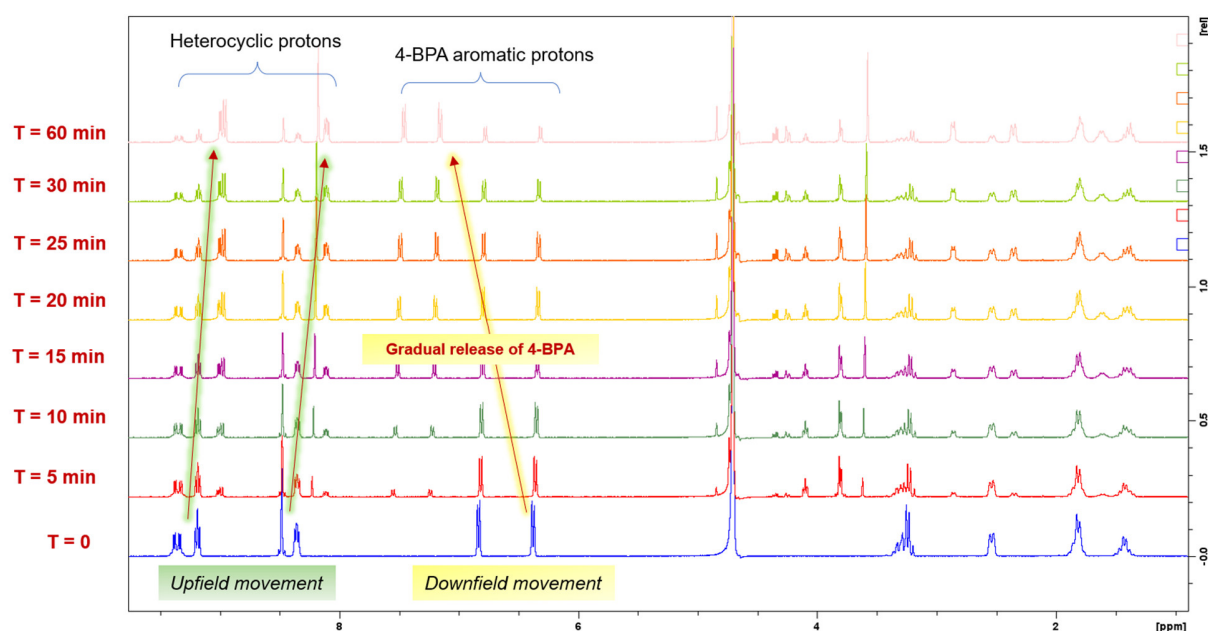

**Figure S87:**  $^1\text{H}$ -NMR spectra of **5** with 10 mM PBS ( $\sim 7.4$  pH) and AsA in  $\text{D}_2\text{O}$  at 310.15 K, in different time intervals, highlighting the movement of resonances from the phenanthroline protons and the aromatic protons of the 4-FPA ligand as indicated by the red arrows. **T** represents time in min.

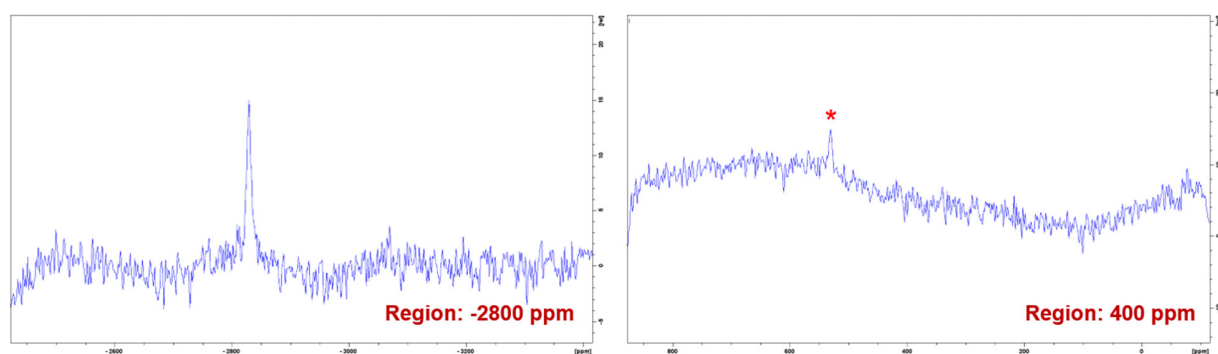

**Figure S88:** 1D- $^{195}\text{Pt}$ -NMR spectra of **5** with 10 mM PBS ( $\sim 7.4$  pH) and AsA in  $\text{D}_2\text{O}$ , within the regions of -2800 and 400 ppm at 310.15 K, highlighting its partial reduction after 1 h from the final  $^1\text{H}$ -NMR experiment as indicated by \*.

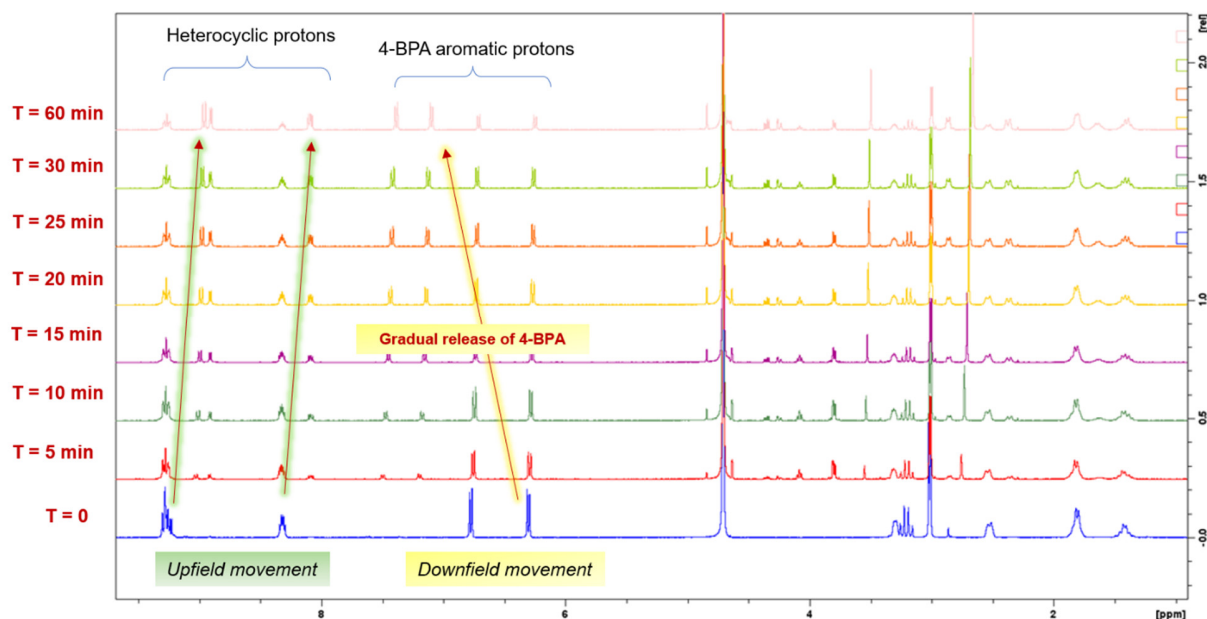

**Figure S89:**  $^1\text{H}$ -NMR spectra of **6** with 10 mM PBS ( $\sim 7.4$  pH) and AsA in  $\text{D}_2\text{O}$  at 310.15 K, in different time intervals, highlighting the movement of resonances from the phenanthroline protons and the aromatic protons of the 4-FPA ligand as indicated by the red arrows. **T** represents time in min.

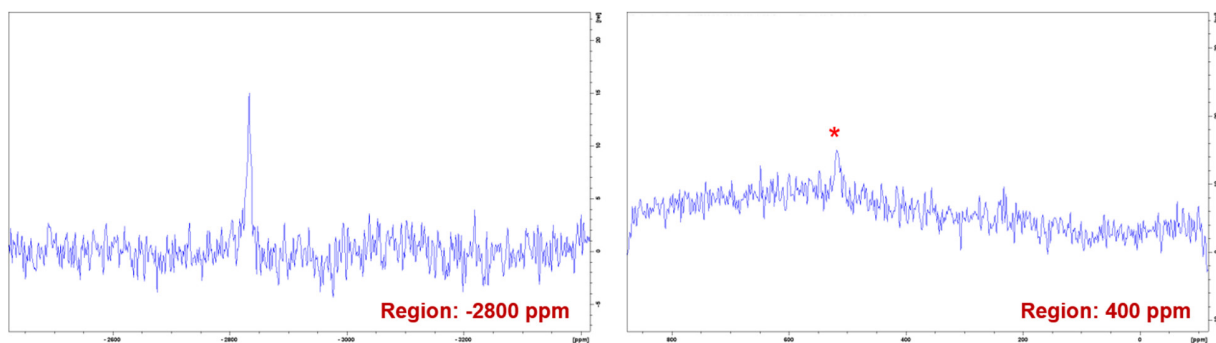

**Figure S90:**  $1\text{D-}^{195}\text{Pt}$ -NMR spectra of **6** with 10 mM PBS ( $\sim 7.4$  pH) and AsA in  $\text{D}_2\text{O}$ , within the regions of -2800 and 400 ppm at 310.15 K, highlighting its partial reduction after 1 h from the final  $^1\text{H}$ -NMR experiment as indicated by \*.

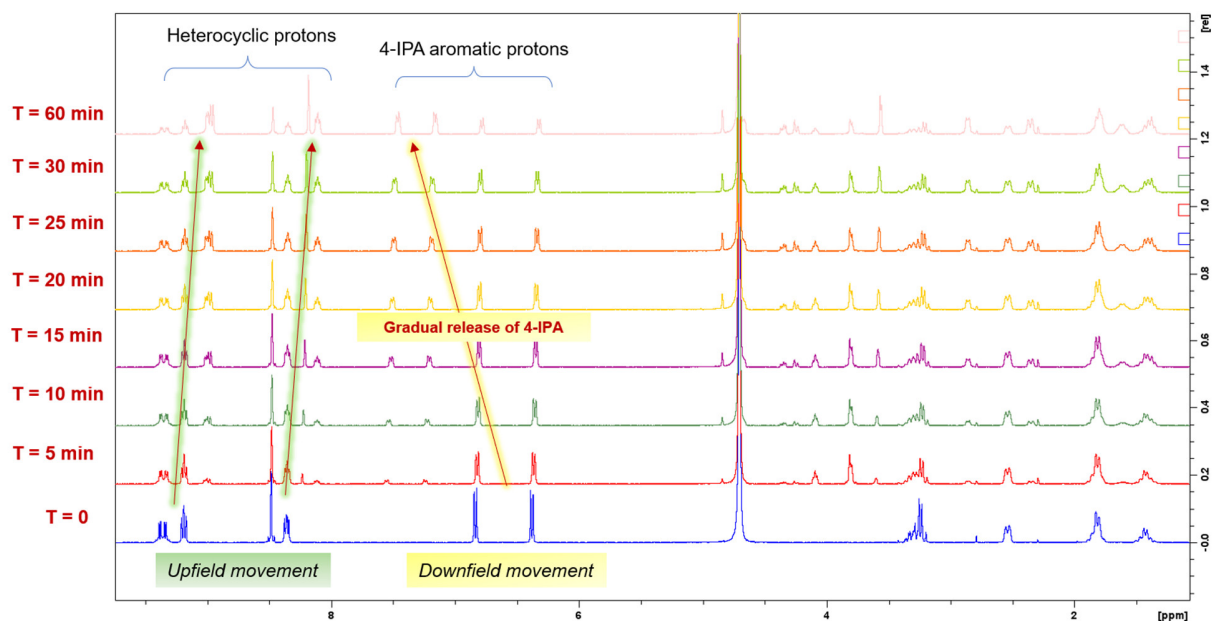

**Figure S91:**  $^1\text{H}$ -NMR spectra of **7** with 10 mM PBS ( $\sim 7.4$  pH) and AsA in  $\text{D}_2\text{O}$  at 310.15 K, in different time intervals, highlighting the movement of resonances from the phenanthroline protons and the aromatic protons of the 4-FPA ligand as indicated by the red arrows. **T** represents time in min.

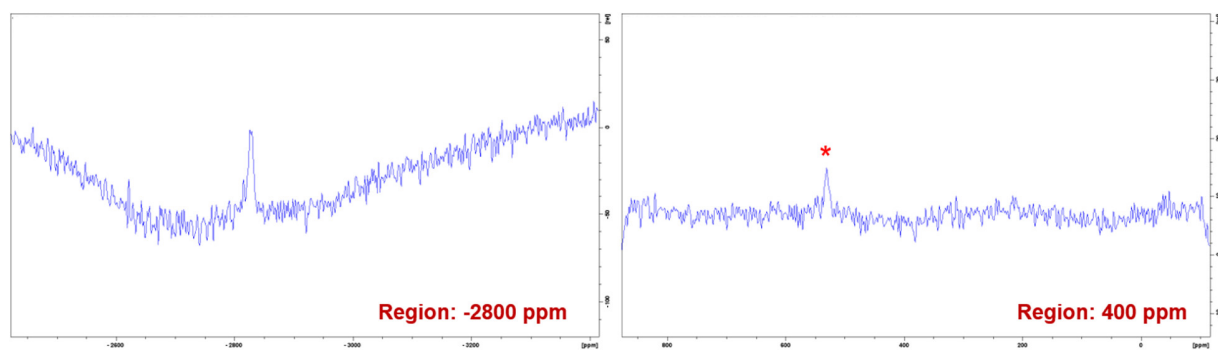

**Figure S92:** 1D- $^{195}\text{Pt}$ -NMR spectra of **7** with 10 mM PBS ( $\sim 7.4$  pH) and AsA in  $\text{D}_2\text{O}$ , within the regions of -2800 and 400 ppm at 310.15 K, highlighting its partial reduction after 1 h from the final  $^1\text{H}$ -NMR experiment as indicated by \*.

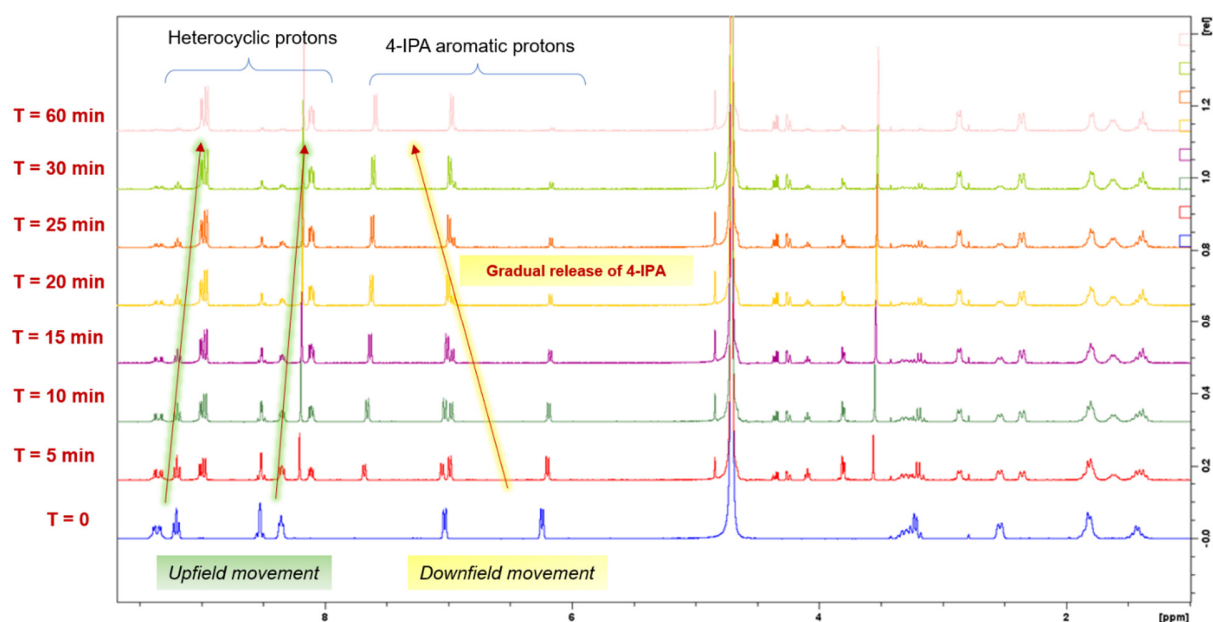

**Figure S93:**  $^1\text{H}$ -NMR spectra of **8** with 10 mM PBS ( $\sim 7.4$  pH) and AsA in  $\text{D}_2\text{O}$  at 310.15 K, in different time intervals, highlighting the movement of resonances from the phenanthroline protons and the aromatic protons of the 4-FPA ligand as indicated by the red arrows. **T** represents time in min.

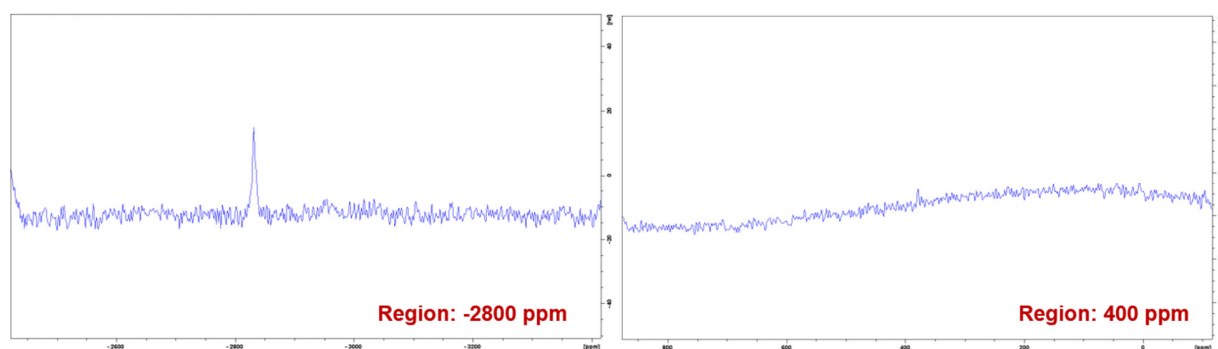

**Figure S94:** 1D- $^{195}\text{Pt}$ -NMR spectra of **8** with 10 mM PBS ( $\sim 7.4$  pH) and AsA in  $\text{D}_2\text{O}$ , within the regions of -2800 and 400 ppm at 310.15 K, highlighting its complete reduction after 1 h from the final  $^1\text{H}$ -NMR experiment.

## ROS experiments

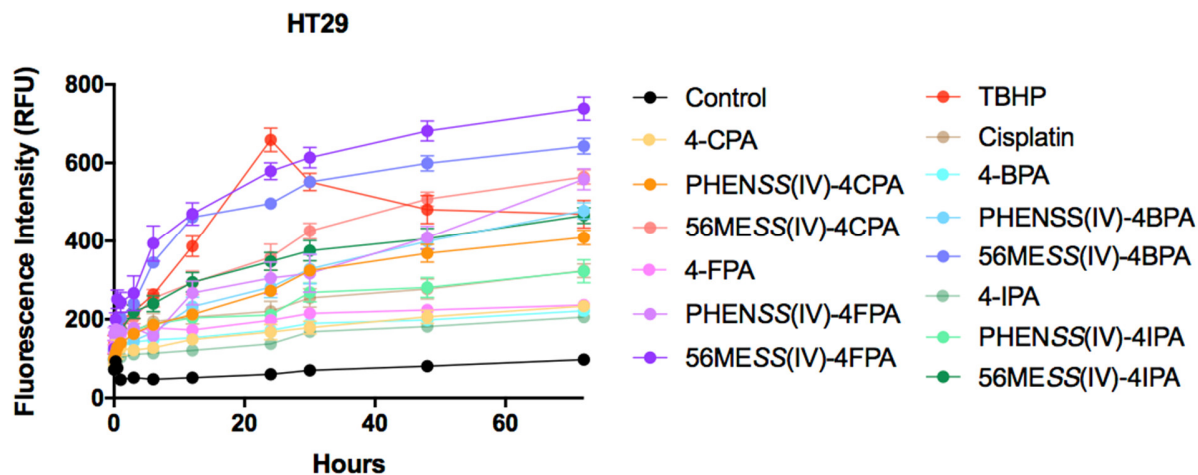

**Figure S95:** ROS production upon treatment with **1–8**, 4-CPA, 4-FPA, 4-BPA, 4-IPA and cisplatin in HT29 colon cells at 0, 0.25, 0.5, 1, 3, 6, 12, 24, 48 and 72 h. **PHENSS(IV)-4CPA** (1), **56MESS(IV)-4CPA** (2), **PHENSS(IV)-4FPA** (3), **56MESS(IV)-4FPA** (4), **PHENSS(IV)-4BPA** (5), **56MESS(IV)-4BPA** (6), **PHENSS(IV)-4IPA** (7), **56MESS(IV)-4IPA** (8). TBHP: t-butyl hydroperoxide. Data points denote mean  $\pm$  SEM.  $n = 3$  from three independent experiments where samples were run in triplicates.
